# Supplementary material for: Understanding decision making about major surgery: protocol for a qualitative study of shared decision making by high-risk patients and their clinical teams
Source: PubMed Central journal article supplement — BMJ Open. 2020 May 5;10(5):e033703. doi: 10.1136/bmjopen-2019-033703 (PMC7223149; doi:10.1136/bmjopen-2019-033703), 2020-05-05
Supplement: bmjopen-2019-033703.draft_revisions.pdf [file bmjopen-2019-033703.draft_revisions.pdf]

# BMJ Open

BMJ Open is committed to open peer review. As part of this commitment we make the peer review history of every article we publish publicly available.

When an article is published we post the peer reviewers' comments and the authors' responses online. We also post the versions of the paper that were used during peer review. These are the versions that the peer review comments apply to.

The versions of the paper that follow are the versions that were submitted during the peer review process. They are not the versions of record or the final published versions. They should not be cited or distributed as the published version of this manuscript.

BMJ Open is an open access journal and the full, final, typeset and author-corrected version of record of the manuscript is available on our site with no access controls, subscription charges or pay-per-view fees (<http://bmjopen.bmj.com>).

If you have any questions on BMJ Open's open peer review process please email [info.bmjopen@bmj.com](mailto:info.bmjopen@bmj.com)

# BMJ Open

## Understanding decision making about major surgery: a qualitative study of shared decision making by high-risk patients and their clinical teams

|                               |                                                                                                                                                                                                                                                                                                                                                                                                                                                                                                                                                                                                                                                                                                                                                                                                      |
|-------------------------------|------------------------------------------------------------------------------------------------------------------------------------------------------------------------------------------------------------------------------------------------------------------------------------------------------------------------------------------------------------------------------------------------------------------------------------------------------------------------------------------------------------------------------------------------------------------------------------------------------------------------------------------------------------------------------------------------------------------------------------------------------------------------------------------------------|
| Journal:                      | <i>BMJ Open</i>                                                                                                                                                                                                                                                                                                                                                                                                                                                                                                                                                                                                                                                                                                                                                                                      |
| Manuscript ID                 | bmjopen-2019-033703                                                                                                                                                                                                                                                                                                                                                                                                                                                                                                                                                                                                                                                                                                                                                                                  |
| Article Type:                 | Protocol                                                                                                                                                                                                                                                                                                                                                                                                                                                                                                                                                                                                                                                                                                                                                                                             |
| Date Submitted by the Author: | 17-Aug-2019                                                                                                                                                                                                                                                                                                                                                                                                                                                                                                                                                                                                                                                                                                                                                                                          |
| Complete List of Authors:     | Shaw, Sara; University of Oxford, Nuffield Department of Primary Care Health Sciences<br>Hughes, Gemma; University of Oxford, Nuffield Department of Primary Care Health Sciences<br>Stephens, Tim; Queen Mary University of London<br>Pearse, Rupert; Queen Mary University of London, Barts and the London School of Medicine & Dentistry<br>Prowle, John; Queen Mary University of London, Barts and the London School of Medicine & Dentistry<br>Ashcroft, Richard; Queen Mary, University of London, School of Law<br>Avagliano, Ester; St. George's University Hospitals Foundation Trust<br>Day, James; John Radcliffe Hospital<br>Edsell, Mark; St. George's University Hospitals Foundation Trust<br>Edwards, Jennifer; Royal Alexandra Hospital<br>Everest, Leslie; Patient representative |
| Keywords:                     | shared decision making, Adult surgery < SURGERY, high risk, QUALITATIVE RESEARCH, communication                                                                                                                                                                                                                                                                                                                                                                                                                                                                                                                                                                                                                                                                                                      |
|                               |                                                                                                                                                                                                                                                                                                                                                                                                                                                                                                                                                                                                                                                                                                                                                                                                      |

SCHOLARONE™  
Manuscripts

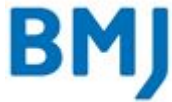

I, the Submitting Author has the right to grant and does grant on behalf of all authors of the Work (as defined in the below author licence), an exclusive licence and/or a non-exclusive licence for contributions from authors who are: i) UK Crown employees; ii) where BMJ has agreed a CC-BY licence shall apply, and/or iii) in accordance with the terms applicable for US Federal Government officers or employees acting as part of their official duties; on a worldwide, perpetual, irrevocable, royalty-free basis to BMJ Publishing Group Ltd ("BMJ") its licensees and where the relevant Journal is co-owned by BMJ to the co-owners of the Journal, to publish the Work in this journal and any other BMJ products and to exploit all rights, as set out in our [licence](#).

The Submitting Author accepts and understands that any supply made under these terms is made by BMJ to the Submitting Author unless you are acting as an employee on behalf of your employer or a postgraduate student of an affiliated institution which is paying any applicable article publishing charge ("APC") for Open Access articles. Where the Submitting Author wishes to make the Work available on an Open Access basis (and intends to pay the relevant APC), the terms of reuse of such Open Access shall be governed by a Creative Commons licence – details of these licences and which [Creative Commons](#) licence will apply to this Work are set out in our licence referred to above.

Other than as permitted in any relevant BMJ Author's Self Archiving Policies, I confirm this Work has not been accepted for publication elsewhere, is not being considered for publication elsewhere and does not duplicate material already published. I confirm all authors consent to publication of this Work and authorise the granting of this licence.

1  
2  
3 **Protocol paper for BMJ Open**  
4  
5  
6  
7  
8  
9

10 **Understanding decision making about major surgery: a**  
11 **qualitative study of shared decision making by high-risk**  
12 **patients and their clinical teams**  
13  
14  
15  
16  
17  
18  
19  
20

---

21  
22  
23 Sara E Shaw (*Associate Professor*)<sup>1</sup>  
24

25 Gemma Hughes (*Postdoctoral researcher*)<sup>1</sup>  
26

27 Tim Stephens (*Doctoral researcher*)<sup>2</sup>  
28

29 Rupert Pearse (*Professor*)<sup>2</sup>  
30

31 John Prowle (*Senior Clinical Lecturer*)<sup>2</sup>  
32

33 Richard Ashcroft (*Professor*)<sup>3</sup>  
34

35 Ester Avagliano (*Consultant Anaesthetist*)<sup>5</sup>  
36

37 James Day (*Consultant in Intensive Care/Anaesthetics*)<sup>4</sup>  
38

39 Mark Edsell (*Consultant in Anaesthesia & Critical Care*)<sup>5</sup>  
40

41 Jennifer Edwards (*Consultant Anaesthetist*)<sup>6</sup>  
42

43 Leslie Everest (*Patient representative*)  
44

45 OSIRIS Programme Group<sup>7</sup>  
46  
47  
48

49  
50  
51  
52 **Affiliations**  
53

54  
55 1 Nuffield Department of Primary Care Health Sciences, University of Oxford, Oxford  
56 OX2 6GG, UK  
57

58  
59 2 William Harvey Research Institute, Queen Mary University of London, UK  
60

- 1
- 2
- 3       3       School of Law, Queen Mary University of London, UK
- 4
- 5       4       John Radcliffe Hospital, Headley Way, Headington, Oxford OX3 9DU
- 6
- 7       5       St. George's University Hospitals Foundation Trust, Blackshaw Road, Tooting, London
- 8       SW17 0QT
- 9
- 10
- 11       6       Royal Alexandra Hospital, Corsebar Road, Paisley, PA2 9PN
- 12
- 13       7       See appendix
- 14
- 15
- 16
- 17
- 18
- 19
- 20
- 21
- 22
- 23
- 24
- 25
- 26
- 27
- 28
- 29
- 30
- 31
- 32
- 33
- 34
- 35
- 36
- 37
- 38
- 39
- 40
- 41
- 42
- 43
- 44
- 45
- 46
- 47
- 48
- 49
- 50
- 51
- 52
- 53
- 54
- 55
- 56
- 57
- 58
- 59
- 60

Corresponding author: [sara.shaw@phc.ox.ac.uk](mailto:sara.shaw@phc.ox.ac.uk)

For peer review only

## ABSTRACT (293/300)

### Introduction

Surgical treatments are being offered to more patients than ever before, and increasingly to high-risk patients (typically over 75, with multi-morbidity). Shared decision making is seen as essential practice. However, little is currently known about what 'good' shared decision making involves nor how it applies in the context of surgery for high-risk patients (typically older patients with multi-morbidity). This new study aims to identify how high-risk patients, their families and clinical teams negotiate decision making for major surgery.

### Methods and analysis

Focusing on major joint replacement, colo-rectal and cardiac surgery, we use qualitative methods to explore how patients, their families and clinicians negotiate decision making (including interactional, communicative and informational aspects and the extent to which these are perceived as shared) and reflect back on the decisions they made. Phase 1 involves video-recording 15 decision making encounters about major surgery between patients, their carers/families and clinicians; followed by up to 90 interviews (with the same patient, carer and clinician participants) immediately after a decision has been made and again 3-6 months later. Phase 2 involves focus groups with a wider group of (up to 90) patients and (up to 30) clinicians to test out emerging findings and inform development of shared decision making scenarios.

### Ethics and dissemination

The study forms the first part in a six-year programme of research, *Optimising Shared decision-making for high Risk Surgery* (OSIRIS). Ethical challenges around involving patients at a challenging time in their lives will be overseen by the programme steering committee, which includes strong patient representation and a lay chair. In addition to academic outputs, we will produce a typology of decision making scenarios for major surgery to feed back to patients, professionals and service providers and inform subsequent work in the OSIRIS programme.

1  
2  
3 Key words: shared decision making, distributed decision making, high risk, adult surgery,  
4 communication, qualitative research,  
5  
6  
7  
8  
9

## 10 ARTICLE SUMMARY

11  
12  
13

### 14 Strengths and limitations of this study

15

- 16 • New study focused on decision making about major surgery with high-risk patients.
- 17 • Novel qualitative design, combining video-recording of decision making encounters, with  
18 individual and group interviews.
- 19 • Guided by theory, which recognises that decisions about surgery rarely occur at neat  
20 'decision points', involve various stages of deliberation, and are shaped by interaction  
21 with many (clinical and non-clinical) individuals.
- 22 • Informs a programme of work, *Optimising Shared decision-making for high Risk Surgery*,  
23 including development of a decision support intervention to improve shared decision  
24 making about elective major surgery.  
25  
26  
27  
28  
29  
30  
31  
32  
33  
34  
35  
36  
37  
38  
39  
40  
41  
42

43 Word count (exc title page, abstract, references, figures and tables): 3999 (4000 is max)  
44  
45  
46  
47  
48  
49  
50  
51  
52  
53  
54  
55  
56  
57  
58  
59  
60

## INTRODUCTION

Shared decision making aims to bring patient values and preferences together with clinician expertise to determine the best care package for the individual concerned. It is not new, building on influential work published since the 1980s (eg, [1-3]). The recent prominence given to shared decision making has accompanied a broader shift towards 'patient-centred care', along with a rise in patient advocacy and increased involvement of patients and the public in the distribution of health care resources [4-9]. In the UK, following a landmark legal case (*Montgomery vs Lanarkshire Health Board*) [10], standards in respect of the consent process have shifted away from what a body of professionals deem relevant (paternalism) to what a reasonable patient would want or need to know (shared decision making) [11-13].

In surgery, shared decision making is espoused as an essential practice on the basis that it can improve patient satisfaction, moderate use of surgery and reduce costs. It is considered crucial at a time when surgical treatments are offered to more patients than ever before, and increasingly offered to older patients who are likely at higher risk of poor postoperative outcomes. Around 1.5 million major surgical procedures are now performed each year in the UK [14], with 250,000 at high risk of post-operative complications [15]. Even when surgery and anaesthesia are straightforward, one in three high-risk patients develops serious medical complications such as pneumonia or myocardial infarction in the days following surgery [16]. These complications delay recovery, with prolonged hospital stays and a decline in functional independence once patients return home. Critically, many high-risk patients never recover from these adverse effects, suffering significant reductions in long-term quality of life and survival [16, 17]. For some, surgery is not the successful treatment they hoped for, with feelings of guilt or regret over the decision to undergo surgery commonplace [18]. Doctors recognise the need to help improve decision making for this patient group but often feel ill-equipped to do so [19], with surgeons and anaesthetists currently lacking the expertise to make informed judgements about the risks such patients face and so concerned about shared decision making. The problem is becoming more frequent as more patients living with severe chronic disease are offered surgical treatments. In sum, many older people are having high-risk surgery (ie, major surgery with high-risk patients) and are sometimes regretting doing so, with this problem likely to increase in the future.



1  
2  
3 Shared decision making is perceived as a potential means of addressing this but the impact of  
4 shared decision making is currently unclear. Three systematic reviews [20-22] have shown  
5 that patients and clinicians generally value it and that it has potential to both improve the  
6 quality of decisions (largely via improved information sharing and increased knowledge [21]),  
7 and lessen conflict in decision making about preference-sensitive surgery (ie, where there is  
8 no one best available treatment, but two or more available options). Overall reviews suggest  
9 that it is the quality of the decision making process, over the decision itself, that is key to  
10 improving outcomes. However, studies have tended to focus on a small number of clinical  
11 areas (eg, breast cancer, osteoarthritis); orient to decision making between the patient and  
12 physician alone; and assess outcomes allied to decision making rather than the process or  
13 experience *per se* (eg, of the 24 studies identified by Boss et al [21], 17 measured outcomes  
14 on the effectiveness of the decision aid without directly assessing doctor-patient  
15 interactions). Few studies have linked surgical outcomes and decision making processes,  
16 considered potentially relevant demographic characteristics (eg, age, socioeconomic status,  
17 ethnicity), or conducted follow up to consider what decisions mean in the context of peoples'  
18 lives after having made their decision to undergo surgery or not. Recently, some authors have  
19 called for a more multi-faceted approach that further considers organisational and system-  
20 level, as well as social and temporal aspects, of shared decision making; including, for  
21 instance: relevant guidelines, workflows and interactions across the clinical team (eg,  
22 involving anaesthetists), the extended care pathway (eg, from pre-operative assessment  
23 through to postoperative de/prescribing), and the influence of wider social relations (eg,  
24 families) [4, 23] [24-26].

25  
26  
27  
28  
29  
30  
31  
32  
33  
34  
35  
36  
37  
38  
39  
40  
41  
42  
43  
44 Interactions between clinicians and patients prior to making a decision about surgery are  
45 important (eg, we know that good communication is associated with increased professional  
46 and patient satisfaction [27]), but rarely the focus of research. To date there has been limited  
47 research on communication between clinicians and patients in the context of shared decision  
48 making for surgery. What little there is has shown that communication practices often  
49 inadequately support preoperative shared decision making about surgery. Most (but not all)  
50 patients prefer to share in decision making but do not always have the chance to do so [8].  
51 Surgeons rarely employ a fully collaborative decision-making process [28, 29], instead  
52 disclosing procedural risks and helping patients make choices by relying on standard practices  
53  
54  
55  
56  
57  
58  
59  
60

1  
2  
3 (eg, informed consent) or communication practices such as the 'fix-it' model, describing the  
4 patient's disease as an isolated abnormality linked directly with a surgical solution [30].  
5  
6

7  
8 Of the literature on shared decision making for surgery, only a small number of North  
9 American studies focus on high-risk patients [31-34]. Two have focussed on how surgeons  
10 and patients discuss options in the event that post-operative complications are severe or life  
11 threatening. Analysis of audio-recorded shared decision making encounters for high-risk  
12 surgery identified significant communication gaps regarding potentially severe post-operative  
13 complications [31, 33]. Follow up interviews revealed assumptions (on the part of patients  
14 and clinicians) that surgeons shared patients' values and expectations and would advise them  
15 accordingly, and that surgeons often regarded decisions about surgery as needing to be  
16 guided by their expertise and experience, over individual and preference-sensitive choice.  
17  
18

19  
20 One study underscored the challenge for patients of incorporating their values and beliefs  
21 into shared decision making for high-risk surgery [32]. Most patients agreed that surgery  
22 should only be considered when it could improve quality of life. However, when faced with a  
23 decision in a life-saving surgery scenario the majority chose surgery with likely subsequent  
24 functional impairment over palliation, citing lack of belief in the surgeons prognosis ('there  
25 must be a better outcome available') and a feeling that 'choosing death' was unacceptable.  
26 Surgeons discussed the challenge of 'surgical momentum', ie, once a patient is on a pathway  
27 toward surgery the expectations of the patient and their family makes it hard to divert them  
28 away from a surgical intervention, even when they recognise the potential risk of severe post-  
29 operative complications. The language used, particularly the focus on 'fixing' a problem, was  
30 found to close down discussions about the value of surgery and how it may fit with patients'  
31 overall values and goals [35]. Other research on the information needs of patients found a  
32 mis-match between what surgeons discussed in consultations and what patients wanted to  
33 know [27]. In particular, patients wanted less technical information and more discussion of  
34 long-term effects on their quality of life and survival. This resonates with recent legal  
35 judgments emphasising that, "*The doctor's duty is not fulfilled by bombarding the patient with*  
36 *technical information*" [10].  
37  
38  
39  
40  
41  
42  
43  
44  
45  
46  
47  
48  
49  
50  
51  
52  
53  
54

55  
56 In sum, the literature on shared decision making for surgery is in its infancy, tends to focus on  
57 information giving as the key component of shared decision making, and employs  
58 quantitative assessments of the outcomes of decision making over qualitative understanding  
59  
60

1  
2  
3 of processes and experiences. Studies relevant to surgery for high-risk patients are limited in  
4 number and suggest that high-risk patients often do not realise that they have a choice about  
5 whether to have surgery or not and have mismatched expectations about what may happen  
6 after surgery.  
7  
8  
9

10  
11 Research that enables understanding of shared decision making for high-risk patients is  
12 therefore timely and necessary. In this new study we seek to identify the key influences on  
13 the shared decision making process for high-risk patients who are offered surgery asking:  
14  
15

- 16  
17 1. How do patients, their families and clinical teams approach and negotiate decision making  
18 for major surgery?  
19
- 20  
21 2. Having had (or declined) major surgery, how do patients, their families and clinical teams  
22 reflect on the decisions they made?  
23  
24  
25  
26  
27

## 28 METHODS AND ANALYSIS

### 29 30 31 32 Origins, design and governance of the study

33  
34 The study forms part of a six-year programme of work, *Optimising Shared decision-making*  
35 *for high Risk Surgery* (OSIRIS, <https://osiris-programme.org/>) funded by the National Institute  
36 for Health Research in England. OSIRIS comprises four interlinked projects leading to the  
37 development and testing of a decision support intervention, to improve shared decision  
38 making about elective major surgery between doctors and patients at high-risk of adverse  
39 long-term outcomes. The OSIRIS programme has significant governance oversight including a  
40 shadow steering committee, with patient and public membership and a lay chair, which meets  
41 six-monthly and feeds into the main programme steering committee. An OSIRIS collaborators  
42 group includes a wide range of stakeholders from NHS, professional bodies, academia, policy  
43 and patients.  
44  
45  
46  
47  
48  
49  
50  
51  
52

53  
54 In this study we use qualitative methods to explore in-depth how patients, their families and  
55 clinicians negotiate decision making and reflect back on the decisions they made. The study  
56 has two phases. Phase 1 involves video-recording decision making encounters about major  
57 surgery, between patients, their carers/families and clinicians to understand the content and  
58  
59  
60

1  
2  
3 flow of decision making about surgery; followed by interviews (immediately after and 3-6  
4 months later) to understand reasoning for and reflections on those decisions. Phase 2 involves  
5 focus groups with a wider group of patients and clinicians to test out emerging findings and  
6 inform development of shared decision making scenarios.  
7  
8  
9

## 10 11 12 13 **Theoretical and conceptual framework**

14  
15  
16 Our research is framed by practice theory, recognising that decisions about surgery are  
17 distributed over time and space (ie, they rarely occur at neat 'decision points' or in single  
18 consultations) [36], involve varied stages of (potentially collaborative) deliberation [37], and  
19 are shaped by interaction with a range of actors and artefacts [38]. This guided us to focus on  
20 decision-making-in-action, seeing the process of decision making and the activities and events  
21 allied to it (eg, consultations, clinics, letters, family discussions), as something that happens  
22 through an on-going process of communication and collaborative articulation of what major  
23 surgery might mean for all those involved. We draw on ethnography of communication (an  
24 approach that aims to produce systematic and richly contextualised descriptions of the  
25 communicative genres, events and practices that are observed in a particular culture [39]) to  
26 understand how meanings about surgery are constructed, the influence of moral and ethical  
27 dimensions and how communication and interaction unfold.  
28  
29

30  
31 Finally, given that healthcare is heavily institutionalised, and behaviour is often ritualised (ie,  
32 we know, and play out, the roles expected of us as clinicians, patients and so on), we draw on  
33 the notion of 'organisational routines' [40], defined as 'recognizable, repetitive patterns of  
34 interdependent action carried out by multiple actors' [41]. Routines are how organisational  
35 life is patterned, hence studying these can provide key insights into how shared decision  
36 making may (or may not) be integrated in to the three surgical areas of interest.  
37  
38  
39

## 40 41 42 43 **Sampling and data collection**

### 44 45 46 **Surgical areas**

47  
48 The OSIRIS programme focuses on three different surgical procedures: major joint, intra-  
49 abdominal and cardiac surgery. We plan to examine how the context of the differing  
50  
51  
52  
53  
54  
55  
56  
57  
58  
59  
60

1  
2  
3 conditions influences the decisions that patients and doctors make, how these decisions are  
4 made in the light of different ways of organising treatments and resources, and the multiple  
5 and varied points at which patients and clinicians come together to consider and make  
6 decisions about surgery.  
7  
8  
9

10  
11 Major joint replacement for osteoarthritis is a symptomatic treatment which will not prolong  
12 life but can improve quality of life for those with significant pain and reduced mobility. It is  
13 likely to be considered and discussed within primary care, as well as specialist musculoskeletal  
14 services, as part of a potentially long-term process of considering surgery with an orthopaedic  
15 team. Coronary artery bypass grafting may prolong life at a population level, but for the  
16 individual patient this benefit is not guaranteed, especially for frailer or multi-morbid  
17 patients. Increasingly, less invasive, percutaneous coronary interventions have created a  
18 range of options for patients with ischaemic heart disease. There are however a range of  
19 short and long term risks associated with both choices (eg, percutaneous options offer fewer  
20 short term risks to patients but have inferior long term outcomes compared to surgery for  
21 more severe ischaemic heart disease). Colorectal surgery for bowel cancer is essential and  
22 requires relatively rapid decisions about treatment. Following diagnosis patients, relatives  
23 and clinicians are faced with choices about the nature of the procedure (including a potential  
24 for palliative surgery) and the need for adjunct radio- or chemotherapy.  
25  
26  
27  
28  
29  
30  
31  
32  
33  
34  
35  
36

37 Preliminary work with clinicians to map out the decision making processes across  
38 conditions/sites (Figures 1-3) has highlighted variation in how services are organised (eg,  
39 variation in the anaesthetic pre-operative assessment offered) and the distributed nature of  
40 decision making (ie, taking place over time, in multiple settings, involving multiple discussions  
41 with, potentially, many people [36, 37]). This means that the process of decision making about  
42 surgery is likely to be different across the three surgical specialties of interest (see Figures 1-  
43 3) and also across settings. Our focus on high-risk patients due to age, chronic disease, or  
44 frailty means that decision making is also likely to be influenced by past experiences (eg, prior  
45 surgery and/or serious illness) and have a more complex combination of long-term outcomes  
46 to consider.  
47  
48  
49  
50  
51  
52  
53  
54

55  
56  
57  
58 FIGURES 1-3 ABOUT HERE  
59  
60

### Phase 1 –video-recording of decision making encounters, plus follow-up interviews

In phase 1 we will purposively select three NHS hospitals that are undertaking at least two of the three surgical procedures of interest. Working with clinical teams we will recruit a maximum variation, purposive-sample of 15 high-risk patients aged  $\geq 60$  years with an age-adjusted Charlson co-morbidity score [42] of  $\geq 4$ , who are contemplating surgery (anticipating five from each surgical group including, where feasible, one patient who has declined surgery), with adequate variation in age, gender and social circumstances and including travel time to the hospital.

We will video-record up to 15 consultations that involve decision making about major surgery for all those who agree to participate, seeking to capture verbal and non-verbal interaction, and enabling detailed insight into the decision making process in terms of the content of consultations (eg, information exchanged) and the interaction (eg, between clinician and patient). This will involve the researcher placing one or two video cameras in the consultation room and recording the consultation. Where the patient agrees, the researcher will remain in the room. This is usual in qualitative studies, enabling appreciation of each consultation as it unfolds in real time.

Pathways for major surgery vary (Figures 1-3). We will not know how decision making processes unfold – and hence exactly which consultation we will record - until we have gained access to each site and clinical team. For some participants the consultation that we record will be with their surgeon and will follow a series of contacts with the health service. For others, the consultation we record may be with another member of the clinical team (eg, anaesthetist) who has had a critical role in the decision-making process.

We will subsequently conduct narrative interviews with patients and clinicians (and carers where relevant) at two points (Table 1). The first will be as soon as practically possible after their consultation (and wherever possible before their surgery), the second 3-6 months later. We will adopt a narrative approach [43], encouraging interviewees to recount the details of their experiences (eg, of their condition, or decision making about surgery) in their own way and in their own time. Interviews will last up to one hour and be audio-recorded.

1  
2  
3 Interview data across multiple perspectives will enable a detailed understanding of the  
4 relevant condition, how it has unfolded, experiences of decision making and the context  
5 within which decisions were made, and thoughts and expectations about surgery (if this is the  
6 option chosen); as well as experiences since having or declining surgery, and reflections back  
7 on the decision made.  
8  
9  
10  
11  
12  
13  
14

15 TABLE 1 ABOUT HERE  
16  
17  
18  
19

## 20 **Phase 2 – focus groups**

21  
22 We will purposively select up to 3 NHS hospitals undertaking major joint surgery, intra-  
23 abdominal surgery and cardiac surgery, using the same criteria as phase 1. We will recruit a  
24 purposive maximum variation sample of up to 90 high-risk patients (up to 9 focus groups),  
25 excluding any patients recruited in phase 1, who have undergone or declined surgery in one  
26 of these areas in the past 12 months and ensuring a mix of age, gender, social circumstances  
27 and surgical outcomes. Where patients with severe complications are unable to participate,  
28 we will invite them to nominate someone who can represent their views and/or have a carer  
29 attend with them.  
30  
31  
32  
33  
34  
35  
36

37 Working with Royal Colleges, we will also recruit a purposive sample of up to 30 surgeons,  
38 doctors, anaesthetists and clinical nurse specialists (up to 3 focus groups) caring for patients  
39 having these types of surgery, ensuring a mix of age, gender, clinical position and experience,  
40 role and location.  
41  
42  
43  
44

45 Focus groups with patients and carers will be held at or close by (eg, local community centre)  
46 to participating sites, involve 8-10 patients or carers in each. Those involving clinicians will be  
47 held at central locations (eg, one of the Royal Colleges). The same topic guide will be used  
48 across groups, guiding participants to introduce themselves and say what their experience is  
49 of making decisions (or supporting others in decision making) about major surgery, before  
50 reviewing draft decision making scenarios developed from phase 1. We plan to ask patients,  
51 carers and clinicians to share thoughts on the draft scenarios, relate them to their own  
52 experiences and use them to reflect on the process of shared decision making more broadly.  
53  
54  
55  
56  
57  
58  
59  
60 Focus groups will be audio-recorded and transcribed.

## Analysis and synthesis

Table 1 summarises different data sources and how these will be analysed and synthesised to provide detailed decision making scenarios and inform the wider OSIRIS programme.

In phase 1 we will develop summaries for each case (ie, patient, family/carers and clinicians), detailing how their condition developed and led them to access services, the process of gaining a diagnosis and discussing possible surgery, the exchange of information about surgery and expectations allied to that, reflections on risk, the involvement of others in decision making about surgery, the experience of surgery and post-operative care or of living with the condition having declined surgery; as well as post-hoc reflections on decision making in light of outcomes following surgery or the decision to decline.

We will supplement this with detailed analysis of decision making encounters. Video-recordings provide a powerful dataset for analysis, allowing us to zoom in and slow down the decision making process to examine interactions, judgements and interpretations [44], the bodily conduct of participants, and the ways in which objects (eg, consent forms) come to gain significance at particular moments [45]. Recordings will be transcribed (eg, using ELAN, a specialist programme used by linguists) to allow us to capture granular (verbal and non-verbal) detail of interaction, repeatedly view and tag data digitally (ensuring immersion in the full video and audio at the level of a sentence, comment or other linguistic feature, which is often key to analysis [45]), and produce a textual transcript meaning that we can engage indirectly with the data via transcripts of each decision making encounter.

We will then examine video data in depth to: identify key features of shared decision making encounters, examine the way 'communicative competence' [46] shapes shared decision making (ie, how participants deploy their tacit understanding of a particular communicative event, and competencies needed to maximise the benefits of the encounter), and attend to the contextual factors (eg, clinic space, presence of carers, preceding exchange of information) that shape decision making. Analysis of interaction will be informed by ethnography of communication (see above) and guided by established techniques developed for the micro-analysis of face-to-face interaction. The issues that are likely to repay close analysis include (but are not limited to): openings (how participants initially frame the



1  
2  
3 consultation) interruptions and repair (how participants deal with interactional problems);  
4 the use of questions (eg, whether and how patients as well as clinicians use them) and, the  
5 expression of affect (particularly when clinicians need to communicate complicated or  
6 sensitive information).  
7  
8  
9

10  
11 We will synthesize data from phase 1 into vignettes, drawing on video-recordings to  
12 understand communication and interaction, and on interviews and field notes to understand  
13 the clinical, organisational, material and cultural context in which shared decision making  
14 takes place. Guided by existing theory (see above) we will compare and contrast across  
15 vignettes to examine similarities and differences in decision making, paying particular  
16 attention to the ways in which participants seek to achieve constructive interpersonal  
17 engagement, recognition of alternative actions, comparative learning, preference  
18 construction and elicitation, and preference integration (ie, the key components of  
19 Collaborative Deliberation [37]). Finally we will develop 3-5 draft decision making scenarios,  
20 emerging from identification of patterns in our emerging analysis about how decision making  
21 variably unfolds amongst different groups, in different settings and for different kinds of  
22 surgery; as well as the extent to which this might be regarded as 'shared'.  
23  
24  
25  
26  
27  
28  
29  
30  
31  
32

33  
34 We will use thematic and comparative analysis to analyse focus group data, generating a  
35 detailed understanding of the choices that patients, families/carers and clinicians make about  
36 surgery, and the factors that shape decision making. We will revise decision making scenarios  
37 in light of wider consensus (or challenge) about the importance placed on short- medium-  
38 and long term outcomes after different types of surgery (or no surgery). Finally we will  
39 synthesise analyses across our datasets, seeking to extend current theory on decision making  
40 for high-risk patients offered surgery (Table 1).  
41  
42  
43  
44  
45  
46  
47  
48  
49

## 50 Patient and public involvement

51  
52 We are committed to patient and public involvement in all stages of the research. Patients  
53 with lived experience of major surgery are included in the OSIRIS programme leadership and  
54 steering committee. A patient panel has already been established, providing patients with the  
55 space to discuss the research, and feed directly into the main steering committee. Patients  
56 will be invited to participate in workshops early in the programme to refine our research  
57  
58  
59  
60

1  
2  
3 design, guide the team on how best to approach sensitive topics with patients, and help to  
4 refine research tools (eg, topic guides). Later in the OSIRIS programme these patient networks  
5 will help to co-design a decision support intervention. Patient co-applicants will act as co-  
6 authors for scientific and lay reports.  
7  
8  
9

## 10 11 12 13 ETHICS AND DISSEMINATION 14 15

16  
17 The research has received ethical approval from South Central Oxford C Research Ethics  
18 Committee (19/SC/0043). At the time of writing we have recruited all three sites and gained  
19 local governance approval.  
20  
21

22  
23 An important ethical issue relates to the involvement of patients (and by extension  
24 family/carers) at a time when they might be feeling emotionally and physically vulnerable and  
25 needing to make potentially life-changing decisions. We have sought to address this by  
26 ensuring that recruitment/consent is as straightforward as possible, framing questions about  
27 care and experiences of surgery sensitively, and inviting patients (should they wish) to involve  
28 family members or other carers in interviews. Working closely with clinical teams, we will be  
29 sensitive to the different clinical pathways and the ways in which information and diagnoses  
30 are shared with patients, and have planned an observation period with each site in phase 1  
31 to appreciate the referral and decision making process about major surgery before recruiting  
32 patients.  
33  
34  
35  
36  
37  
38  
39  
40

41 We plan dissemination within and outside of the OSIRIS programme. For the former we will  
42 produce a typology of decision making scenarios for major surgery. Combined with research  
43 to determine what happens to patients during the years after surgery, this will inform the co-  
44 design, with patients and doctors, of a decision support intervention to be tested in a clinical  
45 trial with a view to providing an accurate forecast of the long-term outcomes that matter  
46 most to patients. For the latter, we will produce research publications and conference  
47 presentations for academics, including a refined theory of shared decision making relevant to  
48 high-risk patients in the context of surgery. For service providers, policymakers and  
49 regulators, we propose succinct and accessible summaries of key findings including  
50 summaries of decision making scenarios and provisional operational guidance. For patients  
51  
52  
53  
54  
55  
56  
57  
58  
59  
60

1  
2  
3 and families/carers, we will produce a leaflet and web download summarising findings and  
4 setting out what to expect when making a decision about major surgery.  
5  
6  
7  
8  
9  
10  
11  
12  
13  
14  
15  
16  
17  
18  
19  
20  
21  
22  
23  
24  
25  
26  
27  
28  
29  
30  
31  
32  
33  
34  
35  
36  
37  
38  
39  
40  
41  
42  
43  
44  
45  
46  
47  
48  
49  
50  
51  
52  
53  
54  
55  
56  
57  
58  
59  
60

For peer review only

## Author contributions:

SS conceptualised the study and wrote the first draft of the paper. GH and TS contributed to study design and will be collecting and analysing data across the study. JD, JE, EA and ME have contributed to understanding surgical pathways, developing decision making maps and approaches to recruitment. RP and JP are co-directors of the OSIRIS programme, of which this study is part. LE is lay chair of the OSIRIS shadow steering group and, as such, has fed into the design and conduct of the study. All authors had input to revisions of the paper and approved the final manuscript.

## Funding statement:

The OSIRIS Programme is supported by the National Institute of Health Research [grant number RP-PG-0218-20001]. SS is also supported via the National Institute for Health Research Biomedical Research Centre, Oxford [grant number BRC-1215-20008] to the Oxford University Hospitals NHS Foundation Trust and the University of Oxford. The views expressed are those of the author(s) and not necessarily those of the NIHR or the Department of Health and Social Care.

## Competing interests statement:

We have read and understood the BMJ Group policy on declaration of interests and declare the following interests: SES, GH, TS, JP, EA, JD, ME, JE, LE declare no interests. RP has received research grants and/or honoraria from Edwards Lifesciences, Intersurgical, BBraun and GlaxoSmithkline.

## REFERENCES

1. Katz J: **The silent world of doctor and patient**. Baltimore, MD: John Hopkins University Press; 1984.
2. Charles C, Gafni A, Whelan T: **Decision-making in the physician–patient encounter: revisiting the shared treatment decision-making model**. *Social Science & Medicine* 1999, **49**(5):651-661.
3. Coulter A, Collins A: **Making shared decision making a reality: no decision about me without me**. In. London: King's Fund; 2011.
4. Sturgess J, Clapp JT, Fleisher LA: **Shared decision-making in peri-operative medicine: a narrative review**. *Anaesthesia* 2019, **74** Suppl 1:13-19.
5. Mongan D, Long J, Farragher L: **Models of Patient Advocacy: Evidence Brief**. In. Dublin: Health Research Board; 2016.
6. Epstein RM, Street RL, Jr.: **The values and value of patient-centered care**. *Annals of family medicine* 2011, **9**(2):100-103.
7. Committee on Quality of Health Care in America. Institute of Medicine: **Crossing the Quality Chasm: A New Health System for the 21st Century**. In. Washington, DC: National Academy Press; 2001.
8. Institute of Medicine: **Dying in America: Improving Quality and Honoring Individual Preferences Near the End of Life**. Washington, DC: The National Academies Press; 2015.
9. **Choosing Wisely** [<https://www.choosingwisely.org/>]
10. **Montgomery (Appellant) v Lanarkshire Health Board (Respondent) [2015] UKSC11 on appeal from [2013] CSIH 3**. In.
11. General Medical Council: **Good medical practice**. In. London: GMC; 2013, updated 2014.
12. Department of Health: **NHS Constitution: the NHS belongs to us all**. In. London: DH; 2009, updated 2015.
13. Key W, Stewart M: **Guidelines for the Provision of Anaesthesia Services**. In. London: Royal College of Anaesthetists; 2016.

14. Abbott TEF, Fowler AJ, Dobbs TD, Harrison EM, Gillies MA, Pearse RM: **Frequency of surgical treatment and related hospital procedures in the UK: a national ecological study using hospital episode statistics.** *Br J Anaesth* 2017, **119**(2):249-257.
15. Pearse RM, Moreno RP, Bauer P, Pelosi P, Metnitz P, Spies C, Vallet B, Vincent J-L, Hoeft A, Rhodes A: **Mortality after surgery in Europe: a 7 day cohort study.** *The Lancet* 2012, **380**(9847):1059-1065.
16. International Surgical Outcomes Study Group: **Global patient outcomes after elective surgery: prospective cohort study in 27 low-, middle- and high-income countries.** *British Journal of Anaesthesia* 2016, **117**(5):601-609.
17. Khuri SF, Daley J, Henderson W, Hur K, Demakis J, Aust JB, Chong V, Fabri PJ, Gibbs JO, Grover F *et al*: **The Department of Veterans Affairs' NSQIP: the first national, validated, outcome-based, risk-adjusted, and peer-controlled program for the measurement and enhancement of the quality of surgical care. National VA Surgical Quality Improvement Program.** *Annals of Surgery* 1998, **228**(4):491-507.
18. Doherty C, Saunders MNK: **Elective surgical patients' narratives of hospitalization: The co-construction of safety.** *Social Science & Medicine* 2013, **98**:29-36.
19. Bougeard A-M, Brent A, Swart M, Snowden C: **A survey of UK peri-operative medicine: pre-operative care.** *Anaesthesia* 2017, **72**(8):1010-1015.
20. de Mik SML, Stubenrouch FE, Balm R, Ubbink DT: **Systematic review of shared decision-making in surgery.** *BJS* 2018, **105**(13):1721-1730.
21. Boss EF, Mehta N, Nagarajan N, Links A, Benke JR, Berger Z, Espinel A, Meier J, Lipstein EA: **Shared Decision Making and Choice for Elective Surgical Care:A Systematic Review.** *Otolaryngology–Head and Neck Surgery* 2016, **154**(3):405-420.
22. Joseph-Williams N, Elwyn G, Edwards A: **Knowledge is not power for patients: A systematic review and thematic synthesis of patient-reported barriers and facilitators to shared decision making.** *Patient Education and Counseling* 2014, **94**(3):291-309.
23. Clapp JT, Arriaga AF, Murthy S, Raper SE, Schwartz JS, Barg FK, Fleisher LA: **Surgical Consultation as Social Process: Implications for Shared Decision Making.** *Ann Surg* 2019, **269**(3):446-452.

- 1
  - 2
  - 3
  - 4
  - 5
  - 6
  - 7
  - 8
  - 9
  - 10
  - 11
  - 12
  - 13
  - 14
  - 15
  - 16
  - 17
  - 18
  - 19
  - 20
  - 21
  - 22
  - 23
  - 24
  - 25
  - 26
  - 27
  - 28
  - 29
  - 30
  - 31
  - 32
  - 33
  - 34
  - 35
  - 36
  - 37
  - 38
  - 39
  - 40
  - 41
  - 42
  - 43
  - 44
  - 45
  - 46
  - 47
  - 48
  - 49
  - 50
  - 51
  - 52
  - 53
  - 54
  - 55
  - 56
  - 57
  - 58
  - 59
  - 60
24. Scholl I, LaRussa A, Hahlweg P, Kobrin S, Elwyn G: **Organizational- and system-level characteristics that influence implementation of shared decision-making and strategies to address them - a scoping review.** *Implement Sci* 2018, **13**(1):40.
25. Müller E, Hahlweg P, Scholl I: **What do stakeholders need to implement shared decision making in routine cancer care? A qualitative needs assessment.** *Acta Oncologica* 2016, **55**(12):1484-1491.
26. King E, Taylor J, Williams R, Vanson: **The MAGIC programme: evaluation. An independent evaluation of the MAGIC (Making good decisions in collaboration) improvement programme.** In. London: Health Foundation; 2013.
27. McNair AGK, MacKichan F, Donovan JL, Brookes ST, Avery KNL, Griffin SM, Crosby T, Blazeby JM: **What surgeons tell patients and what patients want to know before major cancer surgery: a qualitative study.** *BMC Cancer* 2016, **16**:258.
28. Braddock CI, Hudak PL, Feldman JJ, Berecknyi S, Frankel RM, Levinson W: **“Surgery Is Certainly One Good Option”: Quality and Time-Efficiency of Informed Decision-Making in Surgery.** *JBJS* 2008, **90**(9):1830-1838.
29. Kruser JM, Pecanac KE, Brasel KJ, Cooper Z, Steffens N, McKneally M, Schwarze ML: **“And I think that we can fix it”: Mental Models used in High-Risk Surgical Decision Making.** *Annals of surgery* 2015, **261**(4):678-684.
30. Taylor LJ, Rathouz PJ, Berlin A, Brasel KJ, Mosenthal AC, Finlayson E, Cooper Z, Steffens NM, Jacobson N, Buffington A *et al*: **Navigating high-risk surgery: protocol for a multisite, stepped wedge, cluster-randomised trial of a question prompt list intervention to empower older adults to ask questions that inform treatment decisions.** *BMJ Open* 2017, **7**(5).
31. Pecanac KE, Kehler JM, Brasel KJ, Cooper Z, Steffens NM, McKneally MF, Schwarze ML: **It's big surgery: preoperative expressions of risk, responsibility, and commitment to treatment after high-risk operations.** *Ann Surg* 2014, **259**(3):458-463.
32. Nabozny MJ, Kruser JM, Steffens NM, Brasel KJ, Campbell TC, Gaines ME, Schwarze ML: **Constructing High-stakes Surgical Decisions: It's Better to Die Trying.** *Ann Surg* 2016, **263**(1):64-70.
33. Nabozny MJ, Kruser JM, Steffens NM, Pecanac KE, Brasel KJ, Chittenden EH, Cooper Z, McKneally MF, Schwarze ML: **Patient-reported Limitations to Surgical Buy-in: A Qualitative Study of Patients Facing High-risk Surgery.** *Ann Surg* 2017, **265**(1):97-102.

- 1  
2  
3  
4  
5  
6  
7  
8  
9  
10  
11  
12  
13  
14  
15  
16  
17  
18  
19  
20  
21  
22  
23  
24  
25  
26  
27  
28  
29  
30  
31  
32  
33  
34  
35  
36  
37  
38  
39  
40  
41  
42  
43  
44  
45  
46  
47  
48  
49  
50  
51  
52  
53  
54  
55  
56  
57  
58  
59  
60
34. Steffens NM, Tucholka JL, Nabozny MJ, Schmick AE, Brasel KJ, Schwarze ML: **Engaging patients, health care professionals, and community members to improve preoperative decision making for older adults facing high-risk surgery.** *JAMA Surgery* 2016, **151**(10):938-945.
  35. Fovargue S, Miola J: **One step forward, two steps back? The GMC, the common law and 'informed' consent.** *Journal of Medical Ethics* 2010, **36**(8):494-497.
  36. Rapley T: **Distributed decision making: the anatomy of decisions-in-action.** *Sociol Health Illn* 2008, **30**(3):429-444.
  37. Elwyn G, Lloyd A, May C, van der Weijden T, Stiggelbout A, Edwards A, Frosch DL, Rapley T, Barr P, Walsh T *et al*: **Collaborative deliberation: a model for patient care.** *Patient Educ Couns* 2014, **97**(2):158-164.
  38. Feldman MS, Orlikowski WJ: **Theorizing Practice and Practicing Theory.** *Organization Science* 2011, **22**(5):1240-1253.
  39. Gumperz J, Hymes D: **Directions in Sociolinguistics: The Ethnography of Communication.** New York: Basil Blackwell; 1972.
  40. Feldman MS, Pentland BT: **Reconceptualizing Organizational Routines as a Source of Flexibility and Change.** *Administrative Science Quarterly* 2003, **48**(1):94-118.
  41. Feldman MS, Pentland BT, D'Adderio L, Lazaric N: **Beyond Routines as Things: Introduction to the Special Issue on Routine Dynamics.** *Organization Science* 2016, **27**(3):505-513.
  42. Charlson M, Szatrowski TP, Peterson J, Gold J: **Validation of a combined comorbidity index.** *Journal of Clinical Epidemiology* 1994, **47**:1245-1251.
  43. Greenhalgh T, Russell J, Swinglehurst D: **Narrative methods in quality improvement research.** *Quality and Safety in Health Care* 2005, **14**(6):443.
  44. Bezemer J, Cope A, Korkiakangas T, Kress G, Murtagh G, Weldon SM, Kneebone R: **Microanalysis of video from the operating room: an underused approach to patient safety research.** *BMJ Qual Saf* 2017, **26**(7):583-587.
  45. Pearce C: **Doctors, Patients and Computers, the New Consultation (PhD thesis).** . Melbourne, Australia: Department of General Practice, The University of Melbourne; 2007.
  46. Hymes D: **On communicative competence.** In: *Sociolinguistics: Selected Readings.* edn. Edited by Pride JB, Holmes J. Harmondsworth: Penguin; 1972: 269-293.



Figure 1 - Example decision making map for colorectal surgery

For peer review only

*Clinical processes*                      *Clinician-patient encounters*                      *Surgical options*

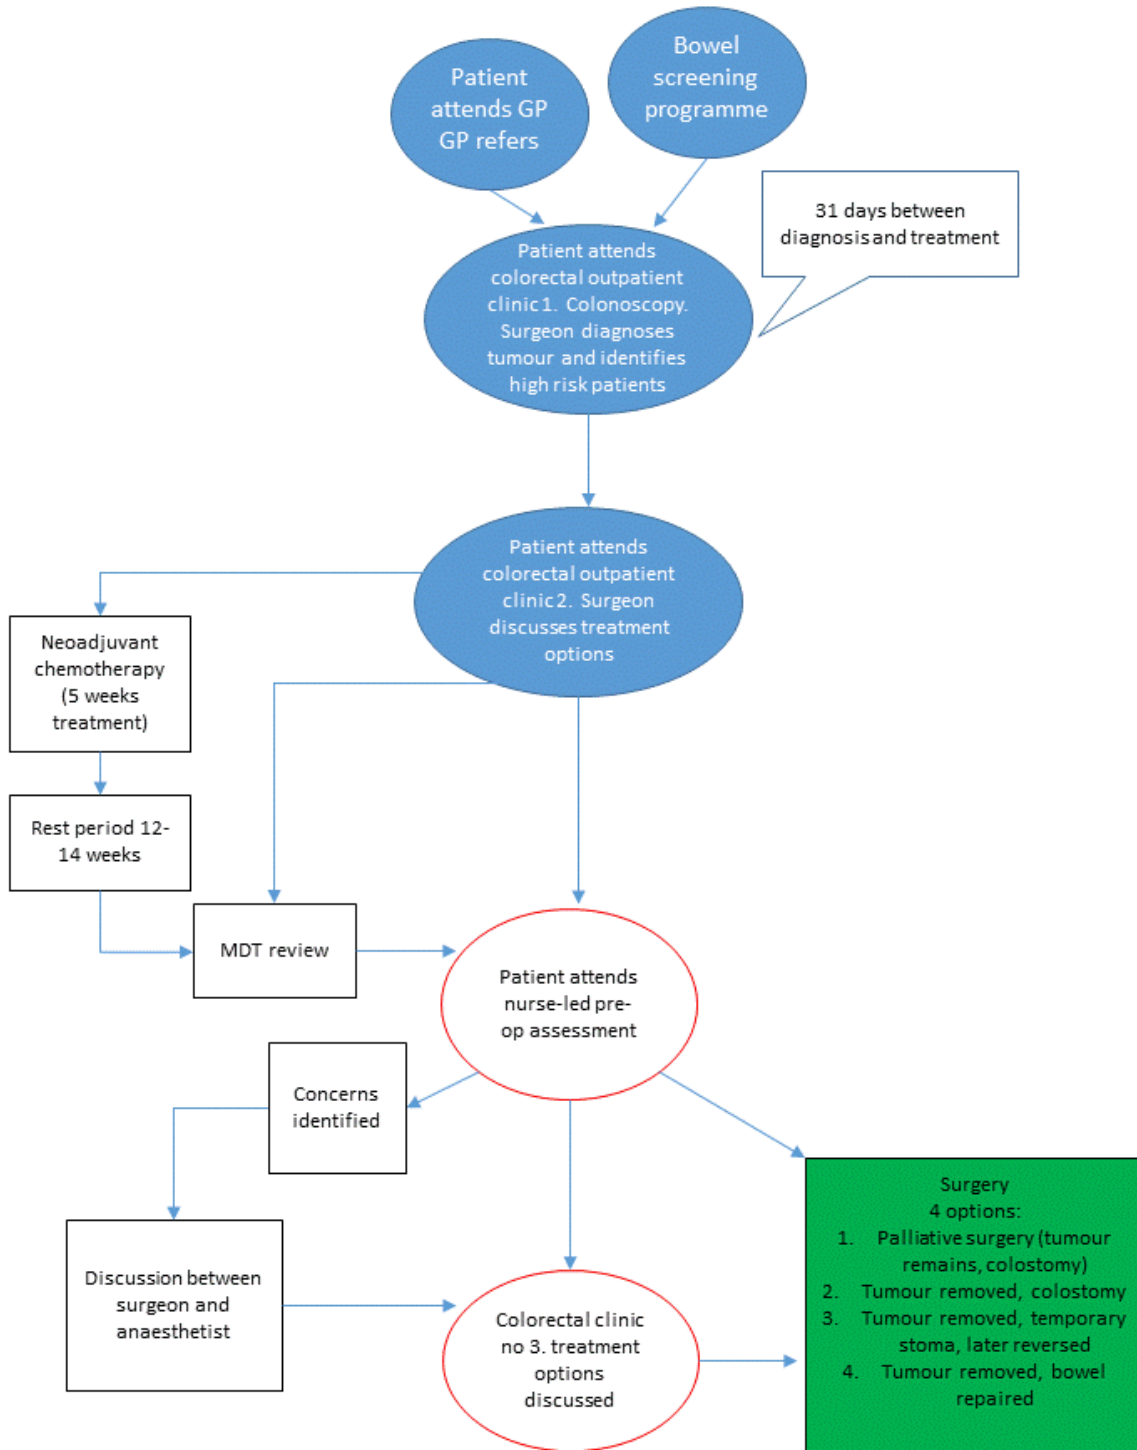

Figure 2 - Example decision-making map for orthopaedic surgery

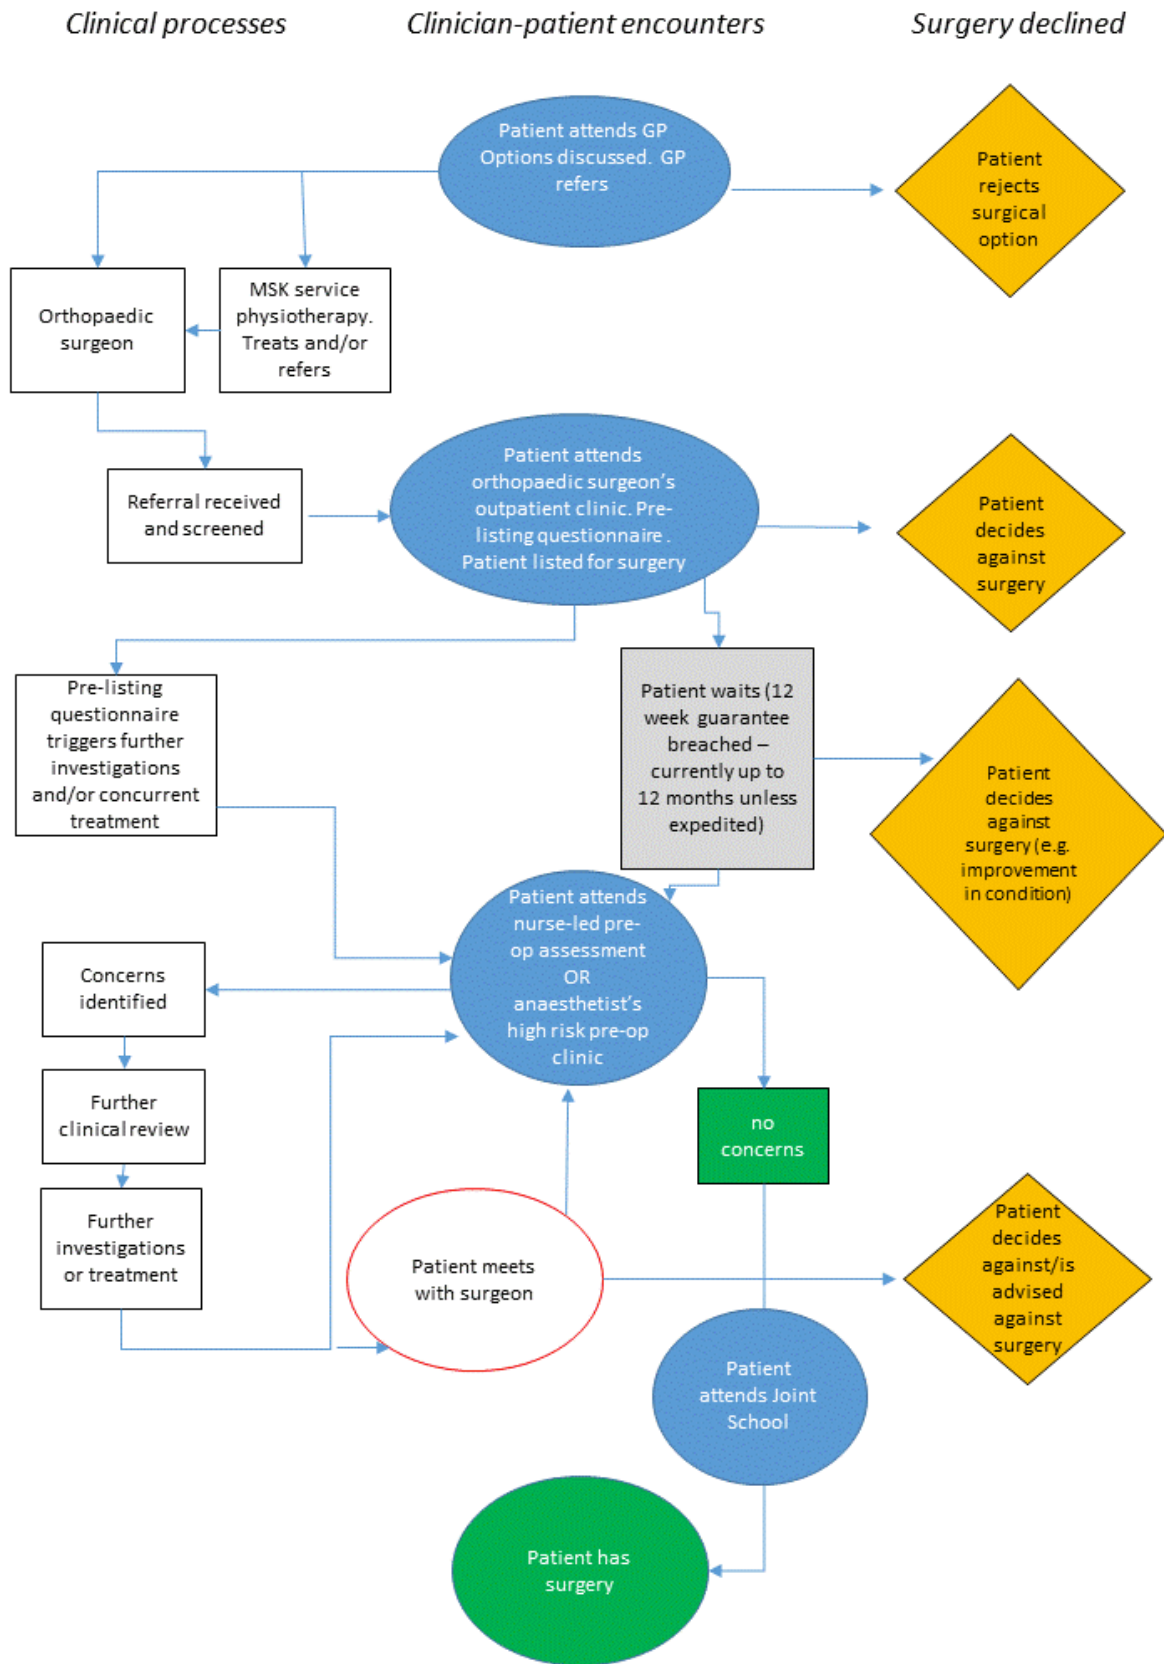

Figure 3 - Example decision-making map for cardiac bypass surgery

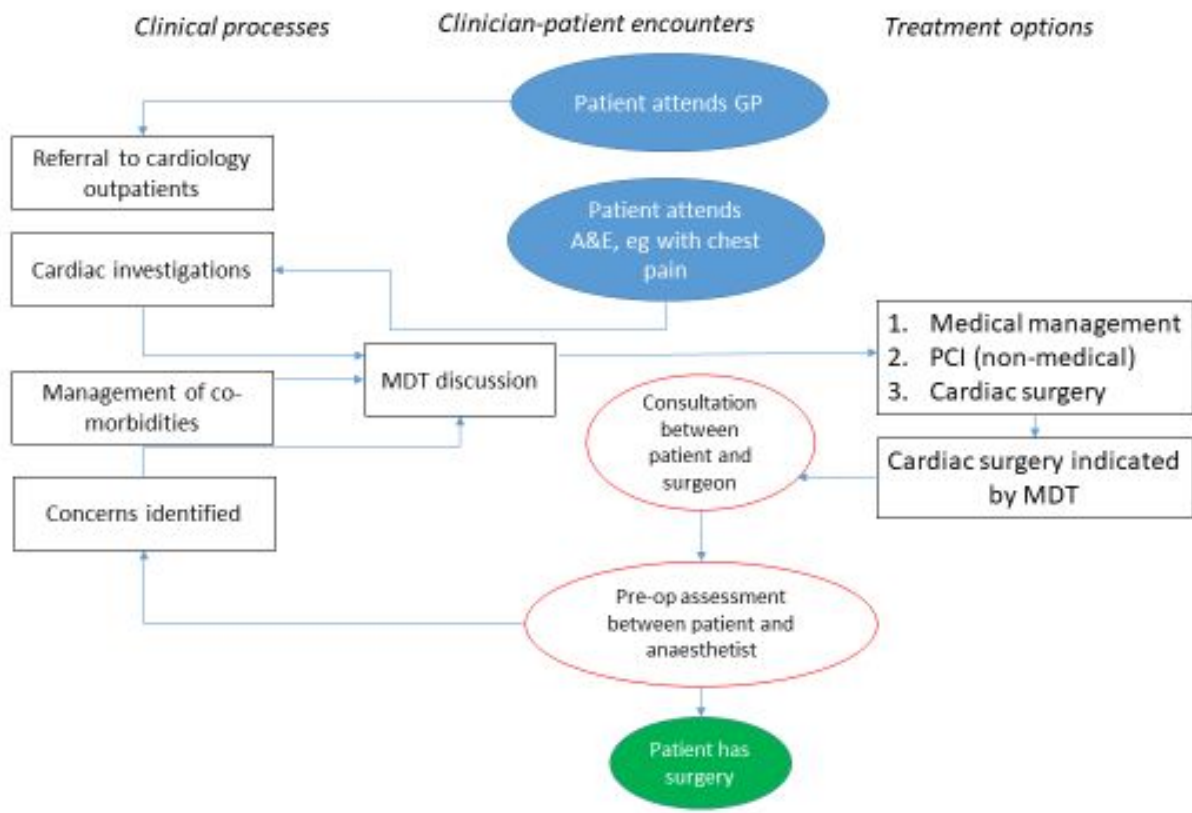

view only

Table 1: Overview of data structure and planned analysis

| Data source                                                  | Data collected                                                                                                                                                                                                                                                                                                             | First order interpretations                                                                                                                                                                                                                                                                                                         | Higher-order interpretations                                                                                                                                                                                                                                                                                                                                                                                                                                                                                              |
|--------------------------------------------------------------|----------------------------------------------------------------------------------------------------------------------------------------------------------------------------------------------------------------------------------------------------------------------------------------------------------------------------|-------------------------------------------------------------------------------------------------------------------------------------------------------------------------------------------------------------------------------------------------------------------------------------------------------------------------------------|---------------------------------------------------------------------------------------------------------------------------------------------------------------------------------------------------------------------------------------------------------------------------------------------------------------------------------------------------------------------------------------------------------------------------------------------------------------------------------------------------------------------------|
| Case studies of decision making for surgery                  | <ul style="list-style-type: none"> <li>Video-recordings of 15 consultations across three different surgical areas</li> <li>Researcher field notes, including clinical pathways</li> </ul>                                                                                                                                  | <ul style="list-style-type: none"> <li>Key exchanges shaping decision making about surgery between clinicians, patients (and potentially carers/family members)</li> <li>Unfolding interaction, and use of decision making aids/tools</li> <li>Clinic workflows, ‘decision points’ for surgery and key interdependencies</li> </ul> | <ul style="list-style-type: none"> <li>How patients, clinicians and carers relate; and how/when they come together to discuss – and make decisions about – surgery</li> <li>‘Scripts’ held by patients/clinicians about how they should behave and interact</li> <li>When a meaningful decision about surgery is made, by whom and how</li> <li>Organisational and clinic context to decision making</li> </ul>                                                                                                           |
| Pre-operative narratives about decision making about surgery | <p>Follow-up interviews (up to 45) with</p> <ul style="list-style-type: none"> <li>the same 15 consulting patients and their clinicians and, where relevant, carer/family member</li> <li>other members of the clinical team (eg, anaesthetists, specialist nurses) involved in shaping decisions about surgery</li> </ul> | <ul style="list-style-type: none"> <li>Reflections on decisions made about surgery</li> <li>Perceptions on the decision making process over time, including strategies for communication and sharing information</li> <li>Experiences of decision making, and expectations going forward</li> </ul>                                 | <ul style="list-style-type: none"> <li>Internal social structures (what actors ‘know’, how they understand and interpret about surgery, including what ‘a decision’ about surgery means to actors</li> <li>‘Scripts’ held about decision making and how they change over time, including assumptions about: <ul style="list-style-type: none"> <li>- capability of users</li> <li>- how people interact</li> <li>- consent</li> <li>- clinical work and routines</li> <li>- how these all interact</li> </ul> </li> </ul> |
| Post-hoc reflections on decision making about surgery        | <ul style="list-style-type: none"> <li>Follow-up interviews (up to 45) with the same 15 consulting patients and their clinicians and, where relevant, carer/family member</li> <li>Focus group interviews with (up to 90) patients/carers and (up to 30) clinicians</li> </ul>                                             | <ul style="list-style-type: none"> <li>Key organisational and clinic strategies, and how these change over time</li> <li>How participants felt</li> </ul>                                                                                                                                                                           |                                                                                                                                                                                                                                                                                                                                                                                                                                                                                                                           |

1  
2  
3  
4  
5  
6  
7  
8  
9  
10  
11  
12  
13  
14  
15  
16  
17  
18  
19  
20  
21  
22  
23  
24  
25  
26  
27  
28  
29  
30  
31  
32  
33  
34  
35  
36  
37  
38  
39  
40  
41  
42  
43  
44  
45  
46

For peer review only

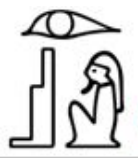

**OSIRIS**

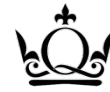

**Queen Mary**  
University of London

1  
2  
3  
4  
5  
6  
7  
8  
9  
10  
11  
12  
13  
14  
15  
16  
17  
18  
19  
20  
21  
22  
23  
24  
25  
26  
27  
28  
29  
30  
31  
32  
33  
34  
35  
36  
37  
38  
39  
40  
41  
42  
43  
44  
45  
46  
47  
48  
49  
50  
51  
52  
53  
54  
55  
56  
57  
58  
59  
60

# OSIRIS

## Programme group list

8<sup>th</sup> Aug 2019

**Programme Directors:**

| First Name | Last name | Role                  | Contact details     | Affiliations                                          |
|------------|-----------|-----------------------|---------------------|-------------------------------------------------------|
| Rupert     | Pearse    | Programme Director    | r.pearse@qmul.ac.uk | Queen Mary University London / Barts Health NHS Trust |
| John       | Prowle    | Programme Co-director | j.prowle@qmul.ac.uk | Queen Mary University London / Barts Health NHS Trust |

**Management group:**

| First Name | Last name  | Role                       | Contact details                                              | Affiliations                                          |
|------------|------------|----------------------------|--------------------------------------------------------------|-------------------------------------------------------|
| Rupert     | Pearse     | Programme Director         | r.pearse@qmul.ac.uk                                          | Queen Mary University London / Barts Health NHS Trust |
| John       | Prowle     | Programme Co-director      | j.prowle@qmul.ac.uk                                          | Queen Mary University London / Barts Health NHS Trust |
| Tim        | Stephens   | Investigator               | t.t.stephens@qmul.ac.uk                                      | Queen Mary University London / Barts Health NHS Trust |
| Alex       | Fowler     | Investigator               | a.fowler@qmul.ac.uk                                          | Queen Mary University London / Barts Health NHS Trust |
| Ruzena     | Uddin      | Senior trials co-ordinator | ruzena.uddin@qmul.ac.uk                                      | Queen Mary University London                          |
| Bethan     | O'Connor   | Trials co-ordinator        | b.griffiths@qmul.ac.uk                                       | Queen Mary University London                          |
| Mari-Liis  | Pakats     | Research co-ordinator      | <a href="mailto:m.pakats@qmul.ac.uk">m.pakats@qmul.ac.uk</a> | Queen Mary University London                          |
| Alastair   | Somerville | Trials co-ordinator        | alastair.somerville@qmul.ac.uk                               | Queen Mary University London                          |

**Project 1: Phase 1: Interviews and video recordings of shared decision making encounters between doctors and patients considering major surgery, & Phase 2: Qualitative focus group discussions with patients and doctors after surgery:**

| First Name | Last name      | Role                       | Contact details                       | Affiliations                                          |
|------------|----------------|----------------------------|---------------------------------------|-------------------------------------------------------|
| Rupert     | Pearse         | Programme Director         | r.pearse@qmul.ac.uk                   | Queen Mary University London / Barts Health NHS Trust |
| John       | Prowle         | Programme Co-director      | j.prowle@qmul.ac.uk                   | Queen Mary University London / Barts Health NHS Trust |
| Sara       | Shaw           | Project Chief Investigator | sara.shaw@phc.ox.ac.uk                | Oxford University                                     |
| Tim        | Stephens       | Investigator               | t.t.stephens@qmul.ac.uk               | Queen Mary University London / Barts Health NHS Trust |
| Gemma      | Hughes         | Investigator               | gemma.hughes@phc.ox.ac.uk             | Oxford University                                     |
| Charlotte  | Thompson-Grant | Administrator              | charlotte.thompson-grant@phc.ox.ac.uk | Oxford University                                     |
| James      | Day            | Local Investigator         | James.Day@ouh.nhs.uk                  | Oxford University Hospital                            |



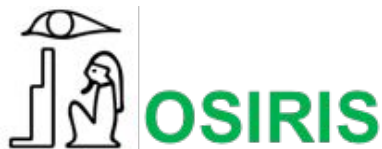

|          |           |                                       |                                   |                          |
|----------|-----------|---------------------------------------|-----------------------------------|--------------------------|
| Jennifer | Edwards   | Local Investigator                    | j.edwards10@nhs.net               | Royal Alexandra Hospital |
| Mark     | Edsel     | Local Investigator (until 20/06/2019) | Mark.Edsell@stgeorges.nhs.uk      | St George's Hospital     |
| Ester    | Avagliano | Local Investigator (from 11/07/2019)  | Esther.Avagliano@stgeorges.nhs.uk | St George's Hospital     |
| Joseph   | Wherton   | Senior Co-Investigator                | joseph.wherton@phc.ox.ac.uk       | Oxford University        |

### **Project 1.3: Comparison of patient and doctor decision making frameworks**

| First Name | Last name  | Role                       | Contact details                      | Affiliations                                          |
|------------|------------|----------------------------|--------------------------------------|-------------------------------------------------------|
| Rupert     | Pearse     | Programme Director         | r.pearse@qmul.ac.uk                  | Queen Mary University London / Barts Health NHS Trust |
| John       | Prowle     | Programme Co-director      | j.prowle@qmul.ac.uk                  | Queen Mary University London / Barts Health NHS Trust |
| Magda      | Osman      | Project Chief Investigator | m.osman@qmul.ac.uk                   | Queen Mary University London                          |
| Tim        | Stephens   | Investigator               | t.t.stephens@qmul.ac.uk              | Queen Mary University London / Barts Health NHS Trust |
| Agata      | Ryterska   | Post-doc researcher        | a.ryterska@qmul.ac.uk                | Queen Mary University London                          |
| Joseph     | Wherton    | Senior Co-Investigator     | joseph.wherton@phc.ox.ac.uk          | Oxford University                                     |
| Steven     | Millington | Clinical advisor           | Steven.Millington@bartshealth.nhs.uk | Barts Health NHS Trust                                |
| Sammy      | Hanna      | Clinical advisor           | Sammy.Hanna@bartshealth.nhs.uk       | Barts Health NHS Trust                                |

### **Project 1.4: Discrete choice surgical decision making experiments**

| First Name | Last name  | Role                       | Contact details                      | Affiliations                                          |
|------------|------------|----------------------------|--------------------------------------|-------------------------------------------------------|
| Rupert     | Pearse     | Programme Director         | r.pearse@qmul.ac.uk                  | Queen Mary University London / Barts Health NHS Trust |
| John       | Prowle     | Programme Co-director      | j.prowle@qmul.ac.uk                  | Queen Mary University London / Barts Health NHS Trust |
| Francesca  | Cornaglia  | Project Chief Investigator | f.cornaglia@qmul.ac.uk               | Queen Mary University London                          |
| Tim        | Stephens   | Investigator               | t.t.stephens@qmul.ac.uk              | Queen Mary University London / Barts Health NHS Trust |
| Joseph     | Wherton    | Senior Co-Investigator     | joseph.wherton@phc.ox.ac.uk          | Oxford University                                     |
| Steven     | Millington | Clinical advisor           | Steven.Millington@bartshealth.nhs.uk | Barts Health NHS Trust                                |
| Sammy      | Hanna      | Clinical advisor           | Sammy.Hanna@bartshealth.nhs.uk       | Barts Health NHS Trust                                |
| Alessandro | Iaria      | Collaborator               | alessandro.iaria@bristol.ac.uk       | Bristol University                                    |
| Eugenio    | Merlano    | Collaborator               | e.f.merlanolombana@hss18.qmul.ac.uk  | Queen Mary University London                          |

**Project 2.1: Long-term surgical outcomes in the UK population**

| First Name | Last name | Role                  | Contact details          | Affiliations                                          |
|------------|-----------|-----------------------|--------------------------|-------------------------------------------------------|
| Rupert     | Pearse    | Programme Director    | r.pearse@qmul.ac.uk      | Queen Mary University London / Barts Health NHS Trust |
| John       | Prowle    | Programme Co-director | j.prowle@qmul.ac.uk      | Queen Mary University London / Barts Health NHS Trust |
| Alex       | Fowler    | Lead Investigator     | a.fowler@qmul.ac.uk      | Queen Mary University London / Barts Health NHS Trust |
| David      | Cromwell  | Senior Investigator   | dcromwell@rcseng.ac.uk   | Royal College of Surgeons                             |
| Kambiz     | Boomla    | Senior Investigator   | k.boomla@qmul.ac.uk      | Queen Mary University London                          |
| Michael    | Gillies   | Collaborator          | michael.gillies@ed.ac.uk | Royal Infirmary Edinburgh                             |
| Ewen       | Harrison  | Collaborator          | ewen.harrison@gmail.com  | University of Edinburgh                               |

**Project 2.2: Burden of primary and secondary care for high-risk patients before and after major**

| First Name | Last name | Role                  | Contact details                  | Affiliations                                          |
|------------|-----------|-----------------------|----------------------------------|-------------------------------------------------------|
| Rupert     | Pearse    | Programme Director    | r.pearse@qmul.ac.uk              | Queen Mary University London / Barts Health NHS Trust |
| John       | Prowle    | Programme Co-director | j.prowle@qmul.ac.uk              | Barts Health NHS Trust                                |
| Alex       | Fowler    | Lead Investigator     | a.fowler@qmul.ac.uk              | Queen Mary University London / Barts Health NHS Trust |
| David      | Cromwell  | Senior Investigator   | dcromwell@rcseng.ac.uk           | Royal College of Surgeons                             |
| Kambiz     | Boomla    | Senior Investigator   | k.boomla@qmul.ac.uk              | Queen Mary University London                          |
| Adam       | Brayne    | Collaborator          | abrayne@doctors.org.uk           | Barts Health NHS Trust                                |
| Bhavi      | Trivedi   | Collaborator          | Bhavi.Trivedi@bartshealth.nhs.uk | Barts Health NHS Trust                                |

**Project 2.3: Collation of quality of life dataset**

| First Name | Last name | Role                  | Contact details        | Affiliations                                          |
|------------|-----------|-----------------------|------------------------|-------------------------------------------------------|
| Rupert     | Pearse    | Programme Director    | r.pearse@qmul.ac.uk    | Queen Mary University London / Barts Health NHS Trust |
| John       | Prowle    | Programme Co-director | j.prowle@qmul.ac.uk    | Queen Mary University London / Barts Health NHS Trust |
| Alex       | Fowler    | Lead Investigator     | a.fowler@qmul.ac.uk    | Queen Mary University London / Barts Health NHS Trust |
| David      | Cromwell  | Senior Investigator   | dcromwell@rcseng.ac.uk | Royal College of Surgeons                             |
| Kambiz     | Boomla    | Senior Investigator   | k.boomla@qmul.ac.uk    | Queen Mary University London                          |

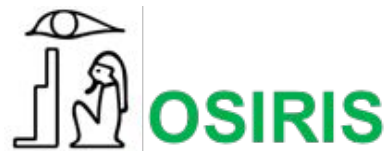

### **Project 3.1: Modelling outcomes for high-risk patients contemplating major surgery**

| <b>First Name</b> | <b>Last name</b> | <b>Role</b>            | <b>Contact details</b>            | <b>Affiliations</b>                                   |
|-------------------|------------------|------------------------|-----------------------------------|-------------------------------------------------------|
| Rupert            | Pearse           | Programme Director     | r.pearse@qmul.ac.uk               | Queen Mary University London / Barts Health NHS Trust |
| John              | Prowle           | Programme Co-director  | j.prowle@qmul.ac.uk               | Queen Mary University London / Barts Health NHS Trust |
| William           | Marsh            | Lead Investigator      | d.w.r.marsh@qmul.ac.uk            | Queen Mary University London                          |
| Charles           | Knowles          | Clinical Advisor       | c.h.knowles@qmul.ac.uk            | Barts Health NHS Trust                                |
| Joseph            | Wherton          | Senior Co-Investigator | joseph.wherton@phc.ox.ac.uk       | Oxford University                                     |
| Neil              | MacDonald        | Clinical Advisor       | Neil.Macdonald@bartshealth.nhs.uk | Barts Health NHS Trust                                |
| Sara              | Shaw             | Senior Co-Investigator | sara.shaw@phc.ox.ac.uk            | Oxford University                                     |

### **Project 3.2: Co-design of the decision support intervention and implementation planning**

| <b>First Name</b> | <b>Last name</b> | <b>Role</b>            | <b>Contact details</b>            | <b>Affiliations</b>                                   |
|-------------------|------------------|------------------------|-----------------------------------|-------------------------------------------------------|
| Rupert            | Pearse           | Programme Director     | r.pearse@qmul.ac.uk               | Queen Mary University London / Barts Health NHS Trust |
| John              | Prowle           | Programme Co-director  | j.prowle@qmul.ac.uk               | Queen Mary University London / Barts Health NHS Trust |
| William           | Marsh            | Lead Investigator      | d.w.r.marsh@qmul.ac.uk            | Queen Mary University London                          |
| Charles           | Knowles          | Clinical Advisor       | c.h.knowles@qmul.ac.uk            | Barts Health NHS Trust                                |
| Joseph            | Wherton          | Senior Co-Investigator | joseph.wherton@phc.ox.ac.uk       | Oxford University                                     |
| Neil              | MacDonald        | Clinical Advisor       | Neil.Macdonald@bartshealth.nhs.uk | Barts Health NHS Trust                                |
| Sara              | Shaw             | Senior Co-Investigator | sara.shaw@phc.ox.ac.uk            | Oxford University                                     |

### **Project 4.1: Testing the feasibility of the decision support intervention**

| <b>First Name</b> | <b>Last name</b> | <b>Role</b>                | <b>Contact details</b>            | <b>Affiliations</b>                                   |
|-------------------|------------------|----------------------------|-----------------------------------|-------------------------------------------------------|
| Rupert            | Pearse           | Programme Director         | r.pearse@qmul.ac.uk               | Queen Mary University London / Barts Health NHS Trust |
| John              | Prowle           | Programme Co-director      | j.prowle@qmul.ac.uk               | Queen Mary University London / Barts Health NHS Trust |
| Tim               | Stephens         | Investigator               | t.t.stephens@qmul.ac.uk           | Queen Mary University London / Barts Health NHS Trust |
| Ann               | Thomson          | Senior trials co-ordinator | ann.thomson@qmul.ac.uk            | Queen Mary University London                          |
| Mel               | Smuk             | Statistician               | m.smuk@qmul.ac.uk                 | Queen Mary University London                          |
| Charles           | Knowles          | Clinical Advisor           | c.h.knowles@qmul.ac.uk            | Barts Health NHS Trust                                |
| Neil              | MacDonald        | Clinical Advisor           | Neil.Macdonald@bartshealth.nhs.uk | Barts Health NHS Trust                                |
| Sandra            | Eldridge         | Senior Co-Investigator     | s.eldridge@qmul.ac.uk             | Queen Mary University                                 |

|      |      |                        |                        |                   |
|------|------|------------------------|------------------------|-------------------|
|      |      |                        |                        | London            |
| Sara | Shaw | Senior Co-Investigator | sara.shaw@phc.ox.ac.uk | Oxford University |

#### **Project 4.2: Cluster randomised trial**

| First Name | Surname   | Role                       | Contact details                   | Affiliations                                          |
|------------|-----------|----------------------------|-----------------------------------|-------------------------------------------------------|
| Rupert     | Pearse    | Programme Director         | r.pearse@qmul.ac.uk               | Queen Mary University London / Barts Health NHS Trust |
| John       | Prowle    | Programme Co-director      | j.prowle@qmul.ac.uk               | Queen Mary University London / Barts Health NHS Trust |
| Tim        | Stephens  | Investigator               | t.t.stephens@qmul.ac.uk           | Queen Mary University London / Barts Health NHS Trust |
| Ann        | Thomson   | Senior trials co-ordinator | ann.thomson@qmul.ac.uk            | Queen Mary University London                          |
| Mel        | Smuk      | Statistician               | m.smuk@qmul.ac.uk                 | Queen Mary University London                          |
| Charles    | Knowles   | Clinical Advisor           | c.h.knowles@qmul.ac.uk            | Barts Health NHS Trust                                |
| Neil       | MacDonald | Clinical Advisor           | Neil.Macdonald@bartshealth.nhs.uk | Barts Health NHS Trust                                |
| Sandra     | Eldridge  | Senior Co-Investigator     | s.eldridge@qmul.ac.uk             | Queen Mary University London                          |
| Sara       | Shaw      | Senior Co-Investigator     | sara.shaw@phc.ox.ac.uk            | Oxford University                                     |

#### **Project 4.3: Mixed method process evaluation of the OSIRIS cluster trial**

| First Name | Surname   | Role                       | Contact details                   | Affiliations                                          |
|------------|-----------|----------------------------|-----------------------------------|-------------------------------------------------------|
| Rupert     | Pearse    | Programme Director         | r.pearse@qmul.ac.uk               | Queen Mary University London / Barts Health NHS Trust |
| John       | Prowle    | Programme Co-director      | j.prowle@qmul.ac.uk               | Queen Mary University London / Barts Health NHS Trust |
| Tim        | Stephens  | Investigator               | t.t.stephens@qmul.ac.uk           | Queen Mary University London / Barts Health NHS Trust |
| Ann        | Thomson   | Senior trials co-ordinator | ann.thomson@qmul.ac.uk            | Queen Mary University London                          |
| Mel        | Smuk      | Statistician               | m.smuk@qmul.ac.uk                 | Queen Mary University London                          |
| Charles    | Knowles   | Clinical Advisor           | c.h.knowles@qmul.ac.uk            | Barts Health NHS Trust                                |
| Neil       | MacDonald | Clinical Advisor           | Neil.Macdonald@bartshealth.nhs.uk | Barts Health NHS Trust                                |
| Sandra     | Eldridge  | Senior Co-Investigator     | s.eldridge@qmul.ac.uk             | Queen Mary University London                          |
| Sara       | Shaw      | Senior Co-Investigator     | sara.shaw@phc.ox.ac.uk            | Oxford University                                     |

#### **Project 4.4: Health economic analyses**

| First Name | Surname | Role                  | Contact details     | Affiliations                                          |
|------------|---------|-----------------------|---------------------|-------------------------------------------------------|
| Rupert     | Pearse  | Programme Director    | r.pearse@qmul.ac.uk | Queen Mary University London / Barts Health NHS Trust |
| John       | Prowle  | Programme Co-director | j.prowle@qmul.ac.uk | Queen Mary University London / Barts Health NHS Trust |

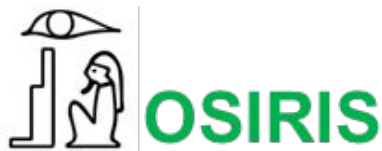

|           |           |                         |                        |                              |
|-----------|-----------|-------------------------|------------------------|------------------------------|
| Borislava | Mihaylova | Senior health economist | b.mihaylova@qmul.ac.uk | Queen Mary University London |
| Vladimir  | Gordeev   | Health economist        | v.gordeev@qmul.ac.uk   | Queen Mary University London |
| Sandra    | Eldridge  | Senior Co-Investigator  | s.eldridge@qmul.ac.uk  | Queen Mary University London |

**Programme Steering Committee (PSC) members:**

| First Name | Surname       | Role                            | Contact details            | Affiliations                                          |
|------------|---------------|---------------------------------|----------------------------|-------------------------------------------------------|
| Rupert     | Pearse        | Programme Director              | r.pearse@qmul.ac.uk        | Queen Mary University London / Barts Health NHS Trust |
| John       | Prowle        | Programme Co-director           | j.prowle@qmul.ac.uk        | Queen Mary University London / Barts Health NHS Trust |
| Julian     | Bion          | Chair                           | J.F.BION@bham.ac.uk        | University of Birmingham                              |
| Obi        | Ukoumunn<br>e | Independent Statistician member | o.c.ukoumunne@exeter.ac.uk | University of Exeter                                  |
| Michael    | Swart         | Independent member              | michael.swart@nhs.net      | Torbay and South Devon NHS Foundation Trust           |
| John       | Hitchman      | Lay member                      | jmhitchman@aol.com         | N/A                                                   |

**Patient and public involvement group (PPI) members:**

| First Name | Surname  | Role          | Contact details                     |
|------------|----------|---------------|-------------------------------------|
| Lesley     | Booth    | PPI organiser | lesley@bowelcancerresearch.org      |
| Tim        | Stephens | PPI organiser | t.t.stephens@qmul.ac.uk             |
| Leslie     | Everest  | PPI           | everelm@aol.com                     |
| Nigel      | Horwood  | PPI           | nigelhorwood@btinternet.com         |
| Len        | Evans    | PPI           | lenevans1@btinternet.com            |
| Gael       | Ramsey   | PPI           | gaelramsey@msn.com                  |
| Eve        | Smyth    | PPI           | fairlady@adrianjs.free-online.co.uk |
| Brian      | Morris   | PPI           | bmazing@yahoo.co.uk                 |

# BMJ Open

## Understanding decision making about major surgery: protocol for a qualitative study of shared decision making by high-risk patients and their clinical teams

|                                 |                                                                                                                                                                                                                                                                                                                                                                                                                                                                                                                                                                                                                                                                                                                                                                                                      |
|---------------------------------|------------------------------------------------------------------------------------------------------------------------------------------------------------------------------------------------------------------------------------------------------------------------------------------------------------------------------------------------------------------------------------------------------------------------------------------------------------------------------------------------------------------------------------------------------------------------------------------------------------------------------------------------------------------------------------------------------------------------------------------------------------------------------------------------------|
| Journal:                        | <i>BMJ Open</i>                                                                                                                                                                                                                                                                                                                                                                                                                                                                                                                                                                                                                                                                                                                                                                                      |
| Manuscript ID                   | bmjopen-2019-033703.R1                                                                                                                                                                                                                                                                                                                                                                                                                                                                                                                                                                                                                                                                                                                                                                               |
| Article Type:                   | Protocol                                                                                                                                                                                                                                                                                                                                                                                                                                                                                                                                                                                                                                                                                                                                                                                             |
| Date Submitted by the Author:   | 07-Feb-2020                                                                                                                                                                                                                                                                                                                                                                                                                                                                                                                                                                                                                                                                                                                                                                                          |
| Complete List of Authors:       | Shaw, Sara; University of Oxford, Nuffield Department of Primary Care Health Sciences<br>Hughes, Gemma; University of Oxford, Nuffield Department of Primary Care Health Sciences<br>Stephens, Tim; Queen Mary University of London<br>Pearse, Rupert; Queen Mary University of London, Barts and the London School of Medicine & Dentistry<br>Prowle, John; Queen Mary University of London, Barts and the London School of Medicine & Dentistry<br>Ashcroft, Richard; Queen Mary, University of London, School of Law<br>Avagliano, Ester; St. George's University Hospitals Foundation Trust<br>Day, James; John Radcliffe Hospital<br>Edsell, Mark; St. George's University Hospitals Foundation Trust<br>Edwards, Jennifer; Royal Alexandra Hospital<br>Everest, Leslie; Patient representative |
| <b>Primary Subject Heading</b>: | Surgery                                                                                                                                                                                                                                                                                                                                                                                                                                                                                                                                                                                                                                                                                                                                                                                              |
| Secondary Subject Heading:      | Health services research, Qualitative research, Sociology                                                                                                                                                                                                                                                                                                                                                                                                                                                                                                                                                                                                                                                                                                                                            |
| Keywords:                       | shared decision making, Adult surgery < SURGERY, high risk, QUALITATIVE RESEARCH, communication                                                                                                                                                                                                                                                                                                                                                                                                                                                                                                                                                                                                                                                                                                      |
|                                 |                                                                                                                                                                                                                                                                                                                                                                                                                                                                                                                                                                                                                                                                                                                                                                                                      |

SCHOLARONE™  
Manuscripts



I, the Submitting Author has the right to grant and does grant on behalf of all authors of the Work (as defined in the below author licence), an exclusive licence and/or a non-exclusive licence for contributions from authors who are: i) UK Crown employees; ii) where BMJ has agreed a CC-BY licence shall apply, and/or iii) in accordance with the terms applicable for US Federal Government officers or employees acting as part of their official duties; on a worldwide, perpetual, irrevocable, royalty-free basis to BMJ Publishing Group Ltd ("BMJ") its licensees and where the relevant Journal is co-owned by BMJ to the co-owners of the Journal, to publish the Work in this journal and any other BMJ products and to exploit all rights, as set out in our [licence](#).

The Submitting Author accepts and understands that any supply made under these terms is made by BMJ to the Submitting Author unless you are acting as an employee on behalf of your employer or a postgraduate student of an affiliated institution which is paying any applicable article publishing charge ("APC") for Open Access articles. Where the Submitting Author wishes to make the Work available on an Open Access basis (and intends to pay the relevant APC), the terms of reuse of such Open Access shall be governed by a Creative Commons licence – details of these licences and which [Creative Commons](#) licence will apply to this Work are set out in our licence referred to above.

Other than as permitted in any relevant BMJ Author's Self Archiving Policies, I confirm this Work has not been accepted for publication elsewhere, is not being considered for publication elsewhere and does not duplicate material already published. I confirm all authors consent to publication of this Work and authorise the granting of this licence.

## Protocol paper for BMJ Open

# Understanding decision making about major surgery: protocol for a qualitative study of shared decision making by high-risk patients and their clinical teams

---

Sara E Shaw (*Associate Professor*)<sup>1</sup>

Gemma Hughes (*Postdoctoral researcher*)<sup>1</sup>

Tim Stephens (*Doctoral researcher*)<sup>2</sup>

Rupert Pearse (*Professor*)<sup>2</sup>

John Prowle (*Senior Clinical Lecturer*)<sup>2</sup>

Richard Ashcroft (*Professor*)<sup>3</sup>

Ester Avagliano (*Consultant Anaesthetist*)<sup>5</sup>

James Day (*Consultant in Intensive Care/Anaesthetics*)<sup>4</sup>

Mark Edsell (*Consultant in Anaesthesia & Critical Care*)<sup>5</sup>

Jennifer Edwards (*Consultant Anaesthetist*)<sup>6</sup>

Leslie Everest (*Patient representative*)

OSIRIS Programme Group<sup>7</sup>

### Affiliations

1 Nuffield Department of Primary Care Health Sciences, University of Oxford, Oxford  
OX2 6GG, UK

2 William Harvey Research Institute, Queen Mary University of London, EC1M 6BQ, UK



- 1
- 2
- 3       3       School of Law, City University, London, UK
- 4
- 5       4       John Radcliffe Hospital, Headley Way, Headington, Oxford OX3 9DU
- 6
- 7       5       St. George's University Hospitals Foundation Trust, Blackshaw Road, Tooting, London
- 8       SW17 0QT
- 9
- 10
- 11       6       Royal Alexandra Hospital, Corsebar Road, Paisley, PA2 9PN
- 12
- 13       7       See appendix
- 14
- 15
- 16
- 17
- 18
- 19
- 20
- 21
- 22
- 23
- 24
- 25
- 26
- 27
- 28
- 29
- 30
- 31
- 32
- 33
- 34
- 35
- 36
- 37
- 38
- 39
- 40
- 41
- 42
- 43
- 44
- 45
- 46
- 47
- 48
- 49
- 50
- 51
- 52
- 53
- 54
- 55
- 56
- 57
- 58
- 59
- 60

Corresponding author: [sara.shaw@phc.ox.ac.uk](mailto:sara.shaw@phc.ox.ac.uk)

For peer review only

## ABSTRACT (299/300)

### Introduction

Surgical treatments are being offered to more patients than ever before, and increasingly to high-risk patients (typically multi-morbid and over 75). Shared decision making is seen as essential practice. However, little is currently known about what 'good' shared decision making involves nor how it applies in the context of surgery for high-risk patients (typically older patients with multi-morbidity). This new study aims to identify how high-risk patients, their families and clinical teams negotiate decision making for major surgery.

### Methods and analysis

Focusing on major joint replacement, colo-rectal and cardiac surgery, we use qualitative methods to explore how patients, their families and clinicians negotiate decision making (including interactional, communicative and informational aspects and the extent to which these are perceived as shared) and reflect back on the decisions they made. Phase 1 involves video-recording 15 decision making encounters about major surgery between patients, their carers/families and clinicians; followed by up to 90 interviews (with the same patient, carer and clinician participants) immediately after a decision has been made and again 3-6 months later. Phase 2 involves focus groups with a wider group of (up to 90) patients and (up to 30) clinicians to test out emerging findings and inform development of shared decision making scenarios (3-5 summary descriptions of how decisions are made).

### Ethics and dissemination

The study forms the first part in a six-year programme of research, *Optimising Shared decision-making for high Risk Surgery* (OSIRIS). Ethical challenges around involving patients at a challenging time in their lives will be overseen by the programme steering committee, which includes strong patient representation and a lay chair. In addition to academic outputs, we will produce a typology of decision making scenarios for major surgery to feed back to patients, professionals and service providers and inform subsequent work in the OSIRIS programme.

1  
2  
3 Key words: shared decision making, distributed decision making, high risk, adult surgery,  
4 communication, qualitative research,  
5  
6  
7  
8  
9

## 10 ARTICLE SUMMARY

11  
12  
13

### 14 Strengths and limitations of this study

15

- 16 • New study focused on decision making about major surgery with high-risk patients.
- 17 • Novel qualitative design, combining video-recording of decision making encounters, with  
18 individual and group interviews.
- 19 • Guided by theory, which recognises that decisions about surgery rarely occur at neat  
20 'decision points', involve various stages of deliberation, and are shaped by interaction  
21 with many (clinical and non-clinical) individuals.
- 22 • Informs a programme of work, *Optimising Shared decision-making for high Risk Surgery*,  
23 including development of a decision support intervention to improve shared decision  
24 making about elective major surgery.  
25  
26  
27  
28  
29  
30  
31  
32  
33  
34  
35  
36  
37  
38  
39  
40  
41  
42

43 Word count (exc title page, abstract, references, figures and tables): 3998  
44  
45  
46  
47  
48  
49  
50  
51  
52  
53  
54  
55  
56  
57  
58  
59  
60

## INTRODUCTION

Shared decision making aims to bring patient values and preferences together with clinician expertise to determine the best care package for the individual concerned. It is not new, building on influential work published since the 1980s (eg, [1-3]). The recent prominence given to shared decision making has accompanied a broader shift towards 'patient-centred care', along with a rise in patient advocacy and increased involvement in resource allocation [4-9]. In the UK, following a landmark legal case [10], standards in respect of the consent process have shifted away from what a body of professionals deem relevant (paternalism) to what a reasonable patient would want or need to know (shared decision making) [11-13].

In surgery, shared decision making is espoused as an essential practice on the basis that it can improve patient satisfaction, moderate use of surgery and reduce costs. It is increasingly offered to older patients who are often (but not always) at higher risk of poor postoperative outcomes. Around 1.5 million major surgical procedures are now performed each year in the UK [14], with 250,000 at high risk of post-operative complications [15]. Even when surgery and anaesthesia are straightforward, one in three high-risk patients develops serious medical complications in the days following surgery [16]. These complications delay recovery, with prolonged hospital stays and a decline in functional independence once patients return home. Critically, many high-risk patients never recover from these adverse effects, suffering significant reductions in long-term quality of life and survival [16, 17]. For some, surgery is not the successful treatment they hoped for, with feelings of guilt or regret commonplace [18]. Doctors recognise the need to help improve decision making for this patient group but often feel ill-equipped to do so [19], with surgeons and anaesthetists currently lacking the expertise to make informed judgements about the risks such patients face. The problem is becoming more frequent as more patients living with severe chronic disease are offered surgical treatments. In sum, many people are having high-risk surgery (ie, major surgery with high-risk patients) and are sometimes regretting doing so, with this problem likely to increase.

Shared decision making is perceived as a potential means of addressing this but the impact of shared decision making is currently unclear. Three systematic reviews [20-22] have shown that patients and clinicians generally value it and that it has potential to both improve the quality of decisions (largely via improved information sharing and increased knowledge [21]),

1  
2  
3 and lessen conflict in decision making about preference-sensitive surgery (ie, where there is  
4 no one best available treatment). Overall reviews suggest that it is the quality of the decision  
5 making process, over the decision itself, that is key to improving outcomes. However, studies  
6 have tended to focus on a small number of clinical areas (eg, breast cancer, osteoarthritis);  
7 orient to decision making between the patient and physician alone; and assess outcomes  
8 allied to decision making rather than the process or experience *per se* (eg, of the 24 studies  
9 identified by Boss et al [21], 17 measured outcomes on the effectiveness of the decision aid  
10 without directly assessing doctor-patient interactions). Few studies have linked surgical  
11 outcomes and decision making processes, considered potentially relevant demographic  
12 characteristics (eg, age, socioeconomic status, ethnicity), or conducted follow up to consider  
13 what decisions about surgery mean in the context of peoples' lives. Recently, some authors  
14 have called for a more multi-faceted approach that further considers organisational and  
15 system-level, as well as social and temporal aspects, of shared decision making including:  
16 relevant guidelines, workflows across the clinical team (eg, involving anaesthetists), the  
17 extended care pathway (eg, from pre-operative assessment through to postoperative  
18 de/prescribing), and the influence of families [4, 23-26].

19  
20  
21  
22  
23  
24  
25  
26  
27  
28  
29  
30  
31  
32  
33 Interactions between clinicians and patients prior to making a decision about surgery are  
34 important (eg, we know that good communication is associated with increased professional  
35 and patient satisfaction [27]), but rarely the focus of research. To date there has been limited  
36 research on communication between clinicians and patients in the context of shared decision  
37 making for surgery. What little there is has shown that communication practices often  
38 inadequately support preoperative shared decision making about surgery. Most (but not all)  
39 patients prefer to share in decision making but do not always have the chance to do so [8].  
40 Surgeons rarely employ a fully collaborative decision-making process [28, 29], instead  
41 disclosing procedural risks and helping patients make choices by relying on standard practices  
42 (eg, informed consent) or communication practices such as the 'fix-it' model, describing the  
43 patient's disease as an isolated abnormality linked directly with a surgical solution [30].

44  
45  
46  
47  
48  
49  
50  
51  
52  
53  
54 Of the literature on shared decision making for surgery, only a small number of North  
55 American studies focus on high-risk patients [31-34]. Two have focussed on how surgeons  
56 and patients discuss options in the event that post-operative complications are severe or life  
57 threatening. Analysis of audio-recorded shared decision making encounters for high-risk  
58  
59  
60

1  
2  
3 surgery identified significant communication gaps regarding potentially severe post-operative  
4 complications [31, 33]. Follow up interviews revealed assumptions (on the part of patients  
5 and clinicians) that surgeons shared patients' values and expectations and would advise them  
6 accordingly, and that surgeons often regarded decisions about surgery as needing to be  
7 guided by their expertise and experience, over individual and preference-sensitive choice.  
8  
9

10  
11  
12 One study underscored the challenge for patients of incorporating their values and beliefs  
13 into shared decision making for high-risk surgery [32]. Most patients agreed that surgery  
14 should only be considered when it could improve quality of life. However, when faced with a  
15 decision in a life-saving surgery scenario the majority chose surgery with likely subsequent  
16 functional impairment over palliation, citing lack of belief in the surgeons prognosis ('there  
17 must be a better outcome available') and a feeling that 'choosing death' was unacceptable.  
18 Surgeons discussed the challenge of 'surgical momentum', ie, once a patient is on a pathway  
19 toward surgery the expectations of the patient and their family makes it hard to divert them  
20 away from a surgical intervention, even when they recognise the potential risk of severe post-  
21 operative complications. The language used, particularly the focus on 'fixing' a problem, was  
22 found to close down discussions about the value of surgery and how it may fit with patients'  
23 overall values and goals [35]. To our knowledge, there are no published studies focused  
24 specifically on clinicians' perceptions of decision making for high-risk surgery, and why it may  
25 (or may not) be 'shared'. Research on the information needs of patients found a mis-match  
26 between what surgeons discussed in consultations and what patients wanted to know [27].  
27 In particular, patients wanted less technical information and more discussion of long-term  
28 effects. This resonates with recent legal judgments emphasising that, "*The doctor's duty is*  
29 *not fulfilled by bombarding the patient with technical information*" [10].  
30  
31  
32  
33  
34  
35  
36  
37  
38  
39  
40  
41  
42  
43  
44  
45

46 In sum, the literature on shared decision making for surgery is in its infancy, tends to focus on  
47 information giving , and employs quantitative assessments of the outcomes of decision  
48 making over qualitative understanding of processes and experiences. Studies relevant to  
49 surgery for high-risk patients are limited in number and suggest that high-risk patients often  
50 do not realise that they have a choice about surgery and have mismatched expectations about  
51 what may happen after surgery.  
52  
53  
54  
55  
56

57 Research that enables understanding of shared decision making for high-risk patients is  
58 therefore timely and necessary. In this new study we seek to identify perspectives on, and  
59  
60

1  
2  
3 communicative features of, the shared decision making process for high-risk patients who are  
4 offered surgery asking:

- 5  
6  
7 1. How do patients, their families and clinical teams approach and negotiate decision making  
8 for major surgery?  
9  
10  
11 2. Having had (or declined) major surgery, how do patients, their families and clinical teams  
12 reflect on the decisions they made?  
13  
14  
15  
16  
17

## 18 METHODS AND ANALYSIS

### 19 Origins, design and governance of the study

20  
21  
22 The study forms part of a six-year programme of work, *Optimising Shared decision-making*  
23 *for high Risk Surgery* (OSIRIS, <https://osiris-programme.org/>) funded by the National Institute  
24 for Health Research in England. OSIRIS comprises four interlinked projects leading to the  
25 development and testing of a decision support intervention, to improve shared decision  
26 making about elective major surgery between doctors and patients at high-risk of adverse  
27 long-term outcomes. The OSIRIS programme has significant governance oversight including a  
28 management group (see supplementary file), a shadow steering committee, with patient and  
29 public membership and a lay chair, which meets six-monthly and feeds into the main  
30 programme steering committee. An OSIRIS collaborators group includes stakeholders from  
31 NHS, professional bodies, academia, policy and patients.  
32  
33  
34  
35  
36  
37  
38  
39  
40  
41  
42

43 In this study we use qualitative methods to explore in-depth how patients, their families and  
44 clinicians negotiate decision making and reflect back on the decisions they made. The study  
45 involves a multidisciplinary team with representation from medicine/nursing, sociology,  
46 social policy and bioethics. Phase 1 involves video-recording decision making encounters  
47 about major surgery, between patients, their carers/families and clinicians to understand the  
48 content and flow of decision making about surgery; followed by interviews (immediately after  
49 and 3-6 months later). Phase 2 involves focus groups with a wider group of patients and  
50 clinicians to test out emerging findings.  
51  
52  
53  
54  
55  
56  
57  
58  
59  
60

## Theoretical and conceptual framework

Our research is framed by practice theory, recognising that decisions about surgery are distributed over time and space (ie, they rarely occur at single 'decision points') [36], involve varied stages of (potentially collaborative) deliberation [37], and are shaped by interaction with a range of actors and artefacts [38]. This guided us to focus on decision-making-in-action, seeing the process of decision making and the activities and events allied to it (eg, consultations, clinics, letters, family discussions), as something that happens through an on-going process of communication and collaborative articulation of what major surgery might mean for those involved. We draw on ethnography of communication (an approach that aims to produce systematic and richly contextualised descriptions of communicative genres, events and practices [39]) to understand how meanings about surgery are constructed, the influence of moral and ethical dimensions and how communication and interaction unfold.

Finally, given that healthcare is heavily institutionalised, and behaviour often ritualised (ie, we know, and play out, the roles expected of us as clinicians, patients and so on), we draw on the notion of 'organisational routines' [40], defined as 'recognizable, repetitive patterns of interdependent action carried out by multiple actors' [41]. Routines are how organisational life is patterned, hence studying these can provide key insights into how shared decision making may (or may not) be integrated in to the three surgical areas of interest.

## Sampling and data collection

### Surgical areas

The OSIRIS programme focuses on three different (elective) surgical procedures: major joint, intra-abdominal and cardiac surgery. We plan to examine how the context of the differing conditions influences the decisions that patients and doctors make, how these decisions are made in the light of different ways of organising treatments and resources, and the multiple points at which patients and clinicians come together to consider and make decisions about surgery.

Major joint replacement for osteoarthritis is a symptomatic treatment which will not prolong life but can improve quality of life for those with significant pain and reduced mobility. It is



1  
2  
3 likely to be considered and discussed within primary care, as well as specialist musculoskeletal  
4 services, as part of a potentially long-term process of considering surgery with an orthopaedic  
5 team. Colorectal surgery for bowel cancer is essential and requires relatively rapid decisions  
6 about treatment. Following diagnosis patients, relatives and clinicians are faced with choices  
7 about the nature of the procedure (including a potential for palliative surgery) and the need  
8 for adjunct radio- or chemotherapy. Coronary artery bypass grafting may prolong life at a  
9 population level, but for the individual patient this benefit is not guaranteed, especially for  
10 frailer or multi-morbid patients. Increasingly, less invasive, percutaneous coronary  
11 interventions have created a range of options for patients with ischaemic heart disease.  
12 There are however a range of short and long term risks associated with both choices (eg,  
13 percutaneous options offer fewer short term risks to patients but have inferior long term  
14 outcomes compared to surgery for more severe ischaemic heart disease).

15 Preliminary work with clinicians to map out the decision making processes across  
16 conditions/sites (Figures 1-3) has highlighted variation in how services are organised (eg,  
17 variation in the anaesthetic pre-operative assessment offered) and the distributed nature of  
18 decision making (ie, taking place over time, in multiple settings, involving multiple discussions  
19 with, potentially, many people [36, 37]). This means that the process of decision making about  
20 elective surgery is likely to be different across the three surgical specialties of interest (see  
21 Figures 1-3) and across settings. Our focus on high-risk patients due to age, chronic disease,  
22 or frailty means that decision making is also likely to be influenced by past experiences (eg,  
23 prior surgery) and have a more complex combination of long-term outcomes to consider.

24  
25  
26  
27  
28  
29  
30  
31  
32  
33  
34  
35  
36  
37  
38  
39  
40  
41  
42  
43  
44  
45 FIGURES 1-3 ABOUT HERE

#### 46 47 48 49 **Phase 1 –video-recording of decision making encounters, plus follow-up interviews**

50  
51 In phase 1 we will purposively select three NHS hospitals that are undertaking at least two of  
52 the three surgical procedures of interest. Working with clinical teams (who will receive study  
53 basic information) we will recruit a maximum variation, purposive-sample of 15 high-risk  
54 patients aged  $\geq 60$  years (to capture a range of high-risk patients, not simply those who are  
55 older) with an age-adjusted Charlson co-morbidity score [42] of  $\geq 4$ , who are contemplating  
56  
57  
58  
59  
60

1  
2  
3 elective surgery (anticipating five from each surgical group including, where feasible, one  
4 patient who has declined surgery), with adequate variation in age, gender and social  
5 circumstances and including travel time to the hospital.  
6  
7

8  
9 We will video-record up to 15 consultations that involve decision making about major surgery  
10 for those who agree to participate, seeking to capture verbal and non-verbal interaction, and  
11 enabling detailed insight into the decision making process in terms of the content of  
12 consultations (eg, information exchanged) and the interaction (eg, between clinician and  
13 patient). This will involve the researcher placing one or two video cameras in the consultation  
14 room and recording the consultation. Where the patient agrees, the researcher will remain  
15 in the room. This is usual in qualitative studies, with the researcher's presence enabling  
16 appreciation of each consultation as it unfolds in real time and the video recording facilitating  
17 detailed analysis of interaction that is not feasible through observation alone).  
18  
19

20  
21 Pathways for major surgery vary (Figures 1-3). We will not know how decision making  
22 processes unfold – and hence exactly which consultation we will record - until we have gained  
23 access to each site and clinical team. For some participants the consultation that we record  
24 will be with their surgeon and will follow a series of contacts with the health service. For  
25 others, the consultation we record may be with another member of the clinical team (eg,  
26 anaesthetist) who has had a critical role in the decision-making process. Where decision  
27 making clearly spans several encounters we will endeavour to record (or at the very least  
28 observe) more than one consultation.  
29  
30

31  
32 We will subsequently conduct narrative interviews with patients and clinicians (and carers  
33 where relevant) at two points (Table 1): as soon as practically possibly after their consultation,  
34 and 3-6 months later. We will adopt a narrative approach [43], encouraging interviewees to  
35 recount the details of their experiences (eg, their condition, decision making about surgery).  
36 Interviews will last up to one hour, be face-to-face (wherever possible, by phone when not)  
37 and be audio-recorded. Reimbursement will be offered for basic expenses (e.g. car parking)  
38 incurred.  
39  
40

41  
42 Interview data will enable a detailed understanding of the relevant condition, how it has  
43 unfolded, experiences of decision making and the context within which decisions were made,  
44 and thoughts and expectations about surgery (if this is the option chosen); as well as  
45 experiences since having or declining surgery, and reflections back on the decision made.  
46  
47  
48  
49  
50  
51  
52  
53  
54  
55  
56  
57  
58  
59  
60

1  
2  
3  
4  
5  
6  
7  
8  
9  
10  
11  
12  
13  
14  
15  
16  
17  
18  
19  
20  
21  
22  
23  
24  
25  
26  
27  
28  
29  
30  
31  
32  
33  
34  
35  
36  
37  
38  
39  
40  
41  
42  
43  
44  
45  
46  
47  
48  
49  
50  
51  
52  
53  
54  
55  
56  
57  
58  
59  
60

TABLE 1 ABOUT HERE

### **Phase 2 – focus groups**

Focus groups will allow us to test out emerging findings with a broader group of participants. We will purposively select up to 3 NHS hospitals (at least one of which will be different from phase 1) undertaking major joint surgery, intra-abdominal surgery and cardiac surgery, using the same criteria as phase 1. We will recruit a purposive maximum variation sample of up to 90 high-risk patients (up to 9 focus groups), excluding any patients recruited in phase 1, who have undergone or declined surgery in one of these areas in the past 12 months and ensuring a mix of age, gender, social circumstances and surgical outcomes. Where patients with severe complications are unable to participate, we will invite them to nominate someone who can represent their views and/or have a carer attend with them.

Working with Royal Colleges, we will also recruit a purposive sample of up to 30 surgeons, doctors, anaesthetists and clinical nurse specialists (up to 3 focus groups) caring for patients having these types of surgery, ensuring a mix of age, gender, clinical position and experience, role and location. We will hold at least one focus group involving a mix of professional groups.

Focus groups with patients and carers will be held at or close by (eg, local community centre) to participating sites, involve 8-10 participants in each. Those involving clinicians will be held at central locations (eg, one of the Royal Colleges). The same topic guide will be used across groups, guiding participants to introduce themselves and say what their experience is of making decisions (or supporting others) about major surgery. We plan to ask patients, carers and clinicians to share thoughts on the draft scenarios (i.e. 3-5 summary descriptions of decision making) developed from phase 1,. Focus groups will be audio-recorded and transcribed.

### **Analysis and synthesis**

Table 1 summarises different data sources and how these will be analysed and synthesised to provide detailed decision making scenarios and inform the wider OSIRIS programme.

1  
2  
3 In phase 1 we will develop summaries for each case (ie, patient, family/carers and clinicians),  
4 detailing how their condition developed and led them to access services, the process of  
5 gaining a diagnosis and discussing possible surgery, the exchange of information about  
6 surgery (including relevant national and international guidelines) and expectations allied to  
7 that, reflections on risk, the involvement of others in decision making about surgery, the  
8 experience of surgery and post-operative care or of living with the condition having declined  
9 surgery; as well as post-hoc reflections on decision making in light of outcomes following  
10 surgery or the decision to decline.  
11  
12

13  
14 We will supplement this with detailed analysis of decision making encounters. Video-  
15 recordings provide a powerful dataset for analysis, allowing us to zoom in and slow down the  
16 decision making process to examine interactions, judgements and interpretations [44], the  
17 bodily conduct of participants, and the ways in which objects (eg, consent forms) come to  
18 gain significance at particular moments [45]. Recordings will be transcribed (eg, using ELAN,  
19 a specialist programme used by linguists) to allow us to capture granular (verbal and non-  
20 verbal) detail of interaction, repeatedly view and tag data digitally (ensuring immersion in the  
21 full video and audio at the level of a sentence, comment or other linguistic feature, which is  
22 often key to analysis [45]), and produce a textual transcript meaning that we can engage  
23 indirectly with the data via transcripts of each decision making encounter.  
24  
25

26  
27 We will then examine video data in depth to: identify key features of shared decision making  
28 encounters, examine the way 'communicative competence' [46] shapes shared decision  
29 making (ie, how participants deploy their tacit understanding of a particular communicative  
30 event, and competencies needed to maximise the benefits of the encounter), and attend to  
31 the contextual factors (eg, presence of carers, preceding exchange of information) that shape  
32 decision making. Analysis of interaction will be informed by ethnography of communication  
33 (see above) and guided by established techniques developed for the micro-analysis of face-  
34 to-face interaction. The issues that are likely to repay close analysis include: openings (how  
35 participants initially frame the consultation); the use of questions (eg, whether and how  
36 patients as well as clinicians use them) and, the expression of affect (particularly when  
37 clinicians need to communicate complicated or sensitive information).  
38  
39

40  
41 We will synthesize data from phase 1 into vignettes, drawing on video-recordings to  
42 understand communication and interaction, and on interviews and field notes to understand  
43  
44  
45  
46  
47  
48  
49  
50  
51  
52  
53  
54  
55  
56  
57  
58  
59  
60

1  
2  
3 the clinical, organisational, material and cultural context in which shared decision making  
4 takes place. Guided by existing theory (see above) we will compare and contrast across  
5 vignettes to examine similarities and differences in decision making, paying particular  
6 attention to the ways in which participants seek to achieve constructive interpersonal  
7 engagement, recognition of alternative actions, comparative learning, preference  
8 construction and elicitation, and preference integration (ie, the key components of  
9 Collaborative Deliberation [37]). Finally we will develop 3-5 draft decision making scenarios,  
10 emerging from identification of patterns in our emerging analysis about how decision making  
11 variably unfolds amongst different groups, in different settings and for different kinds of  
12 surgery; as well as the extent to which this might be regarded as 'shared'.  
13  
14  
15  
16  
17  
18  
19  
20  
21

22 We will use thematic and comparative analysis [47] to analyse focus group data, generating a  
23 detailed understanding of the choices that patients, families/carers and clinicians make about  
24 surgery, and the factors that shape decision making. We will revise decision making scenarios  
25 in light of wider consensus (or challenge) about the importance placed on short- medium-  
26 and long term outcomes after different types of surgery (or no surgery). Finally we will  
27 synthesise analyses across our datasets, seeking to extend current theory on decision making  
28 for high-risk patients offered surgery (Table 1).  
29  
30  
31  
32  
33  
34  
35  
36  
37  
38  
39

## 40 Patient and public involvement

41 We are committed to patient and public involvement in all stages of the research. Patients  
42 with lived experience of major surgery are included in the OSIRIS programme leadership and  
43 steering committee. A patient panel has already been established, providing patients with the  
44 space to discuss the research, and feed directly into the main steering committee. Patients  
45 will be invited to participate in workshops early in the programme to refine our research  
46 design, guide the team on how best to approach sensitive topics with patients, and help to  
47 refine research tools (eg, topic guides). Later in the OSIRIS programme these patient networks  
48 will help to co-design a decision support intervention. Patient co-applicants will act as co-  
49 authors for scientific and lay reports.  
50  
51  
52  
53  
54  
55  
56  
57  
58  
59  
60

## ETHICS AND DISSEMINATION

The research has received ethical approval from South Central Oxford C Research Ethics Committee (19/SC/0043). At the time of writing we have recruited all three sites and gained local governance approval.

An important ethical issue relates to the involvement of patients (and by extension family/carers) at a time when they might be feeling emotionally and physically vulnerable and needing to make potentially life-changing decisions. We have sought to address this by ensuring that recruitment/consent is as straightforward as possible, framing questions about care and experiences of surgery sensitively, and inviting patients (should they wish) to involve family members or other carers in interviews. Working closely with clinical teams, we will be sensitive to the different clinical pathways and the ways in which information and diagnoses are shared with patients, and have planned an observation period with each site in phase 1 to appreciate the referral and decision making process about major surgery before recruiting patients.

We plan dissemination within and outside of the OSIRIS programme (Table 2). For the former we will produce a typology of decision making scenarios for major surgery. Combined with research to determine what happens to patients during the years after surgery, this will inform the co-design of a decision support intervention to be tested in a clinical trial. For the latter, we will produce research publications and presentations for academics, including a refined theory of shared decision making relevant to high-risk patients in the context of surgery. For service providers, policymakers and regulators, we propose succinct and accessible summaries of key findings including summaries of decision making scenarios and provisional operational guidance. For patients and families/carers, we will produce a leaflet and web download summarising findings and setting out what to expect when making a decision about major surgery.

TABLE 2 ABOUT HERE

1  
2  
3 Availability of video data holds potential for further research and training about shared  
4 decision making (Table 2). In future we plan to work with colleagues in the OSIRIS programme  
5 and more widely to provide rich and detailed accounts of shared decision making in practice,  
6 and inform practice.  
7  
8  
9  
10  
11  
12  
13  
14  
15  
16  
17  
18  
19  
20  
21  
22  
23  
24  
25  
26  
27  
28  
29  
30  
31  
32  
33  
34  
35  
36  
37  
38  
39  
40  
41  
42  
43  
44  
45  
46  
47  
48  
49  
50  
51  
52  
53  
54  
55  
56  
57  
58  
59  
60

For peer review only

## Author contributions:

SS conceptualised the study and wrote the first draft of the paper. GH and TS contributed to study design and will be collecting and analysing data across the study. JD, JE, EA and ME have contributed to understanding surgical pathways, developing decision making maps and approaches to recruitment. RA has contributed to theoretical approach, particularly on decision making. RP and JP are co-directors of the OSIRIS programme, of which this study is part. LE is lay chair of the OSIRIS shadow steering group and, as such, has fed into the design and conduct of the study. All authors had input to revisions of the paper and approved the final manuscript.

## Funding statement:

The OSIRIS Programme is supported by the National Institute of Health Research [grant number RP-PG-0218-20001]. SS is also supported via the National Institute for Health Research Biomedical Research Centre, Oxford [grant number BRC-1215-20008] to the Oxford University Hospitals NHS Foundation Trust and the University of Oxford. The views expressed are those of the author(s) and not necessarily those of the NIHR or the Department of Health and Social Care.

## Competing interests statement:

We have read and understood the BMJ Group policy on declaration of interests and declare the following interests: SES, GH, TS, JP, EA, JD, ME, JE, LE declare no interests. RP has received research grants and/or honoraria from Edwards Lifesciences, Intersurgical, BBraun and GlaxoSmithkline.



## REFERENCES

1. Katz J: **The silent world of doctor and patient**. Baltimore, MD: John Hopkins University Press; 1984.
2. Charles C, Gafni A, Whelan T: **Decision-making in the physician–patient encounter: revisiting the shared treatment decision-making model**. *Social Science & Medicine* 1999, **49**(5):651-661.
3. Coulter A, Collins A: **Making shared decision making a reality: no decision about me without me**. In. London: King's Fund; 2011.
4. Sturgess J, Clapp JT, Fleisher LA: **Shared decision-making in peri-operative medicine: a narrative review**. *Anaesthesia* 2019, **74** Suppl 1:13-19.
5. Mongan D, Long J, Farragher L: **Models of Patient Advocacy: Evidence Brief**. In. Dublin: Health Research Board; 2016.
6. Epstein RM, Street RL, Jr.: **The values and value of patient-centered care**. *Annals of family medicine* 2011, **9**(2):100-103.
7. Committee on Quality of Health Care in America. Institute of Medicine: **Crossing the Quality Chasm: A New Health System for the 21st Century**. In. Washington, DC: National Academy Press; 2001.
8. Institute of Medicine: **Dying in America: Improving Quality and Honoring Individual Preferences Near the End of Life**. Washington, DC: The National Academies Press; 2015.
9. **Choosing Wisely** [<https://www.choosingwisely.org/>]
10. **Montgomery (Appellant) v Lanarkshire Health Board (Respondent) [2015] UKSC11 on appeal from [2013] CSIH 3**. In.
11. General Medical Council: **Good medical practice**. In. London: GMC; 2013, updated 2014.
12. Department of Health: **NHS Constitution: the NHS belongs to us all**. In. London: DH; 2009, updated 2015.
13. Key W, Stewart M: **Guidelines for the Provision of Anaesthesia Services**. In. London: Royal College of Anaesthetists; 2016.
14. Abbott TEF, Fowler AJ, Dobbs TD, Harrison EM, Gillies MA, Pearse RM: **Frequency of surgical treatment and related hospital procedures in the UK: a national ecological study using hospital episode statistics**. *Br J Anaesth* 2017, **119**(2):249-257.
15. Pearse RM, Moreno RP, Bauer P, Pelosi P, Metnitz P, Spies C, Vallet B, Vincent J-L, Hoefft A, Rhodes A: **Mortality after surgery in Europe: a 7 day cohort study**. *The Lancet* 2012, **380**(9847):1059-1065.
16. International Surgical Outcomes Study Group: **Global patient outcomes after elective surgery: prospective cohort study in 27 low-, middle- and high-income countries**. *British Journal of Anaesthesia* 2016, **117**(5):601-609.
17. Khuri SF, Daley J, Henderson W, Hur K, Demakis J, Aust JB, Chong V, Fabri PJ, Gibbs JO, Grover F *et al*: **The Department of Veterans Affairs' NSQIP: the first national, validated, outcome-based, risk-adjusted, and peer-controlled program for the measurement and enhancement of the quality of surgical care. National VA Surgical Quality Improvement Program**. *Annals of Surgery* 1998, **228**(4):491-507.
18. Doherty C, Saunders MNK: **Elective surgical patients' narratives of hospitalization: The co-construction of safety**. *Social Science & Medicine* 2013, **98**:29-36.
19. Bougeard A-M, Brent A, Swart M, Snowden C: **A survey of UK peri-operative medicine: pre-operative care**. *Anaesthesia* 2017, **72**(8):1010-1015.
20. de Mik SML, Stubenrouch FE, Balm R, Ubbink DT: **Systematic review of shared decision-making in surgery**. *BJS* 2018, **105**(13):1721-1730.

- 1
  - 2
  - 3
  - 4
  - 5
  - 6
  - 7
  - 8
  - 9
  - 10
  - 11
  - 12
  - 13
  - 14
  - 15
  - 16
  - 17
  - 18
  - 19
  - 20
  - 21
  - 22
  - 23
  - 24
  - 25
  - 26
  - 27
  - 28
  - 29
  - 30
  - 31
  - 32
  - 33
  - 34
  - 35
  - 36
  - 37
  - 38
  - 39
  - 40
  - 41
  - 42
  - 43
  - 44
  - 45
  - 46
  - 47
  - 48
  - 49
  - 50
  - 51
  - 52
  - 53
  - 54
  - 55
  - 56
  - 57
  - 58
  - 59
  - 60
21. Boss EF, Mehta N, Nagarajan N, Links A, Benke JR, Berger Z, Espinel A, Meier J, Lipstein EA: **Shared Decision Making and Choice for Elective Surgical Care:A Systematic Review.** *Otolaryngology–Head and Neck Surgery* 2016, **154**(3):405-420.
22. Joseph-Williams N, Elwyn G, Edwards A: **Knowledge is not power for patients: A systematic review and thematic synthesis of patient-reported barriers and facilitators to shared decision making.** *Patient Education and Counseling* 2014, **94**(3):291-309.
23. Clapp JT, Arriaga AF, Murthy S, Raper SE, Schwartz JS, Barg FK, Fleisher LA: **Surgical Consultation as Social Process: Implications for Shared Decision Making.** *Ann Surg* 2019, **269**(3):446-452.
24. Scholl I, LaRussa A, Hahlweg P, Kobrin S, Elwyn G: **Organizational- and system-level characteristics that influence implementation of shared decision-making and strategies to address them - a scoping review.** *Implement Sci* 2018, **13**(1):40.
25. Müller E, Hahlweg P, Scholl I: **What do stakeholders need to implement shared decision making in routine cancer care? A qualitative needs assessment.** *Acta Oncologica* 2016, **55**(12):1484-1491.
26. King E, Taylor J, Williams R, Vanson: **The MAGIC programme: evaluation. An independent evaluation of the MAGIC (Making good decisions in collaboration) improvement programme.** In. London: Health Foundation; 2013.
27. McNair AGK, MacKichan F, Donovan JL, Brookes ST, Avery KNL, Griffin SM, Crosby T, Blazeby JM: **What surgeons tell patients and what patients want to know before major cancer surgery: a qualitative study.** *BMC Cancer* 2016, **16**:258.
28. Braddock CI, Hudak PL, Feldman JJ, Berecknyei S, Frankel RM, Levinson W: **“Surgery Is Certainly One Good Option”: Quality and Time-Efficiency of Informed Decision-Making in Surgery.** *JBJS* 2008, **90**(9):1830-1838.
29. Kruser JM, Pecanac KE, Brasel KJ, Cooper Z, Steffens N, McKneally M, Schwarze ML: **“And I think that we can fix it”: Mental Models used in High-Risk Surgical Decision Making.** *Annals of surgery* 2015, **261**(4):678-684.
30. Taylor LJ, Rathouz PJ, Berlin A, Brasel KJ, Mosenthal AC, Finlayson E, Cooper Z, Steffens NM, Jacobson N, Buffington A *et al*: **Navigating high-risk surgery: protocol for a multisite, stepped wedge, cluster-randomised trial of a question prompt list intervention to empower older adults to ask questions that inform treatment decisions.** *BMJ Open* 2017, **7**(5).
31. Pecanac KE, Kehler JM, Brasel KJ, Cooper Z, Steffens NM, McKneally MF, Schwarze ML: **It's big surgery: preoperative expressions of risk, responsibility, and commitment to treatment after high-risk operations.** *Ann Surg* 2014, **259**(3):458-463.
32. Nabozny MJ, Kruser JM, Steffens NM, Brasel KJ, Campbell TC, Gaines ME, Schwarze ML: **Constructing High-stakes Surgical Decisions: It's Better to Die Trying.** *Ann Surg* 2016, **263**(1):64-70.
33. Nabozny MJ, Kruser JM, Steffens NM, Pecanac KE, Brasel KJ, Chittenden EH, Cooper Z, McKneally MF, Schwarze ML: **Patient-reported Limitations to Surgical Buy-in: A Qualitative Study of Patients Facing High-risk Surgery.** *Ann Surg* 2017, **265**(1):97-102.
34. Steffens NM, Tucholka JL, Nabozny MJ, Schmick AE, Brasel KJ, Schwarze ML: **Engaging patients, health care professionals, and community members to improve preoperative decision making for older adults facing high-risk surgery.** *JAMA Surgery* 2016, **151**(10):938-945.
35. Fovargue S, Miola J: **One step forward, two steps back? The GMC, the common law and ‘informed’ consent.** *Journal of Medical Ethics* 2010, **36**(8):494-497.
36. Rapley T: **Distributed decision making: the anatomy of decisions-in-action.** *Sociol Health Illn* 2008, **30**(3):429-444.

- 1  
2  
3  
4  
5  
6  
7  
8  
9  
10  
11  
12  
13  
14  
15  
16  
17  
18  
19  
20  
21  
22  
23  
24  
25  
26  
27  
28  
29  
30  
31  
32  
33  
34  
35  
36  
37  
38  
39  
40  
41  
42  
43  
44  
45  
46  
47  
48  
49  
50  
51  
52  
53  
54  
55  
56  
57  
58  
59  
60
37. Elwyn G, Lloyd A, May C, van der Weijden T, Stiggelbout A, Edwards A, Frosch DL, Rapley T, Barr P, Walsh T *et al*: **Collaborative deliberation: a model for patient care**. *Patient Educ Couns* 2014, **97**(2):158-164.
38. Feldman MS, Orlikowski WJ: **Theorizing Practice and Practicing Theory**. *Organization Science* 2011, **22**(5):1240-1253.
39. Gumperz J, Hymes D: **Directions in Sociolinguistics: The Ethnography of Communication**. New York: Basil Blackwell; 1972.
40. Feldman MS, Pentland BT: **Reconceptualizing Organizational Routines as a Source of Flexibility and Change**. *Administrative Science Quarterly* 2003, **48**(1):94-118.
41. Feldman MS, Pentland BT, D'Adderio L, Lazaric N: **Beyond Routines as Things: Introduction to the Special Issue on Routine Dynamics**. *Organization Science* 2016, **27**(3):505-513.
42. Charlson M, Szatrowski TP, Peterson J, Gold J: **Validation of a combined comorbidity index**. *Journal of Clinical Epidemiology* 1994, **47**:1245-1251.
43. Greenhalgh T, Russell J, Swinglehurst D: **Narrative methods in quality improvement research**. *Quality and Safety in Health Care* 2005, **14**(6):443.
44. Bezemer J, Cope A, Korikiakangas T, Kress G, Murtagh G, Weldon SM, Kneebone R: **Microanalysis of video from the operating room: an underused approach to patient safety research**. *BMJ Qual Saf* 2017, **26**(7):583-587.
45. Pearce C: **Doctors, Patients and Computers, the New Consultation (PhD thesis)**. . Melbourne, Australia: Department of General Practice, The University of Melbourne; 2007.
46. Hymes D: **On communicative competence**. In: *Sociolinguistics: Selected Readings*. edn. Edited by Pride JB, Holmes J. Harmondsworth: Penguin; 1972: 269-293.
47. Miles M, Huberman M, Saldana J: **Qualitative Data Analysis: A Methods Sourcebook**. London: Sage; 2014.

**Table 1: Overview of data structure and planned analysis**

| Data source                                                                     | Data collected                                                                                                                                                                                                                                                                                                      | First order interpretations                                                                                                                                                                                                                                                                                                         | Higher-order interpretations                                                                                                                                                                                                                                                                                                                                                                                                                                                                                                  |
|---------------------------------------------------------------------------------|---------------------------------------------------------------------------------------------------------------------------------------------------------------------------------------------------------------------------------------------------------------------------------------------------------------------|-------------------------------------------------------------------------------------------------------------------------------------------------------------------------------------------------------------------------------------------------------------------------------------------------------------------------------------|-------------------------------------------------------------------------------------------------------------------------------------------------------------------------------------------------------------------------------------------------------------------------------------------------------------------------------------------------------------------------------------------------------------------------------------------------------------------------------------------------------------------------------|
| Case studies of decision making for surgery (Jun-19 to Feb-20)                  | <ul style="list-style-type: none"> <li>Video-recordings of 15 consultations across three different surgical areas</li> <li>Researcher field notes, including clinical pathways</li> </ul>                                                                                                                           | <ul style="list-style-type: none"> <li>Key exchanges shaping decision making about surgery between clinicians, patients (and potentially carers/family members)</li> <li>Unfolding interaction, and use of decision making aids/tools</li> <li>Clinic workflows, 'decision points' for surgery and key interdependencies</li> </ul> | <ul style="list-style-type: none"> <li>How patients, clinicians and carers relate; and how/when they come together to discuss – and make decisions about – surgery</li> <li>'Scripts' held by patients/clinicians about how they should behave and interact</li> <li>When a meaningful decision about surgery is made, by whom and how</li> <li>Organisational and clinic context to decision making</li> </ul>                                                                                                               |
| Pre-operative narratives about decision making about surgery (Sep-19 to Feb-20) | Follow-up interviews (up to 45) with <ul style="list-style-type: none"> <li>the same 15 consulting patients and their clinicians and, where relevant, carer/family member</li> <li>other members of the clinical team (eg, anaesthetists, specialist nurses) involved in shaping decisions about surgery</li> </ul> | <ul style="list-style-type: none"> <li>Reflections on decisions made about surgery</li> <li>Perceptions on the decision making process over time, including strategies for communication and sharing information</li> <li>Experiences of decision making, and expectations going forward</li> </ul>                                 | <ul style="list-style-type: none"> <li>Internal social structures (what actors 'know', how they understand and interpret about surgery, including what 'a decision' about surgery means to actors</li> <li>'Scripts' held about decision making and how they change over time, including assumptions about:               <ul style="list-style-type: none"> <li>capability of users</li> <li>how people interact</li> <li>consent</li> <li>clinical work and routines</li> <li>how these all interact</li> </ul> </li> </ul> |
| Post-hoc reflections on decision making about surgery (Dec-19 to Jun-20)        | <ul style="list-style-type: none"> <li>Follow-up interviews (up to 45) with the same 15 consulting patients and their clinicians and, where relevant, carer/family member</li> <li>Focus group interviews with (up to 90) patients/carers and (up to 30) clinicians</li> </ul>                                      | <ul style="list-style-type: none"> <li>Key organisational and clinic strategies, and how these change over time</li> <li>How participants felt</li> </ul>                                                                                                                                                                           |                                                                                                                                                                                                                                                                                                                                                                                                                                                                                                                               |

1  
2  
3  
4  
5  
6  
7  
8  
9  
10  
11  
12  
13  
14  
15  
16  
17  
18  
19  
20  
21  
22  
23  
24  
25  
26  
27  
28  
29  
30  
31  
32  
33  
34  
35  
36  
37  
38  
39  
40  
41  
42  
43  
44  
45  
46

For peer review only

Table 2: Anticipated outputs and impact

|                                                                     | <b>Planned outputs</b>                                                                                                                                                                                                                                                                                       | <b>Anticipated impact</b>                                                                                                                                                                                                                                                                                                                                             |
|---------------------------------------------------------------------|--------------------------------------------------------------------------------------------------------------------------------------------------------------------------------------------------------------------------------------------------------------------------------------------------------------|-----------------------------------------------------------------------------------------------------------------------------------------------------------------------------------------------------------------------------------------------------------------------------------------------------------------------------------------------------------------------|
| <b>Phase 1</b><br>Video recording of consultations, plus interviews | 15 detailed vignettes of decision making for high risk surgery<br><br>3-5 draft decision making scenarios, summarising patient pathways and decision making                                                                                                                                                  | Increased understanding (within and beyond OSIRIS) of the process of decision making.<br><br>Identification of the long-term outcomes that matter most to patients contemplating major surgery                                                                                                                                                                        |
| <b>Phase 2</b><br>Focus groups with patients, carers and clinicians | Typology of decision making scenarios<br><br>Exemplar vignettes and videos (with consent) providing insights into decision making for high risk surgery<br><br>Research publications and presentations, plus accessible summaries of key findings<br><br>Leaflet and web download for patients and families. | Inform co-design, with patients and doctors, of a decision support intervention to be tested in a clinical trial<br><br>Refined theory of shared decision making relevant to high-risk surgical patients<br><br>Improved guidance for clinicians, patients and providers<br><br>Increased understanding of what to expect when making a decision about major surgery. |

Figure 1 - Example decision-making map for orthopaedic surgery

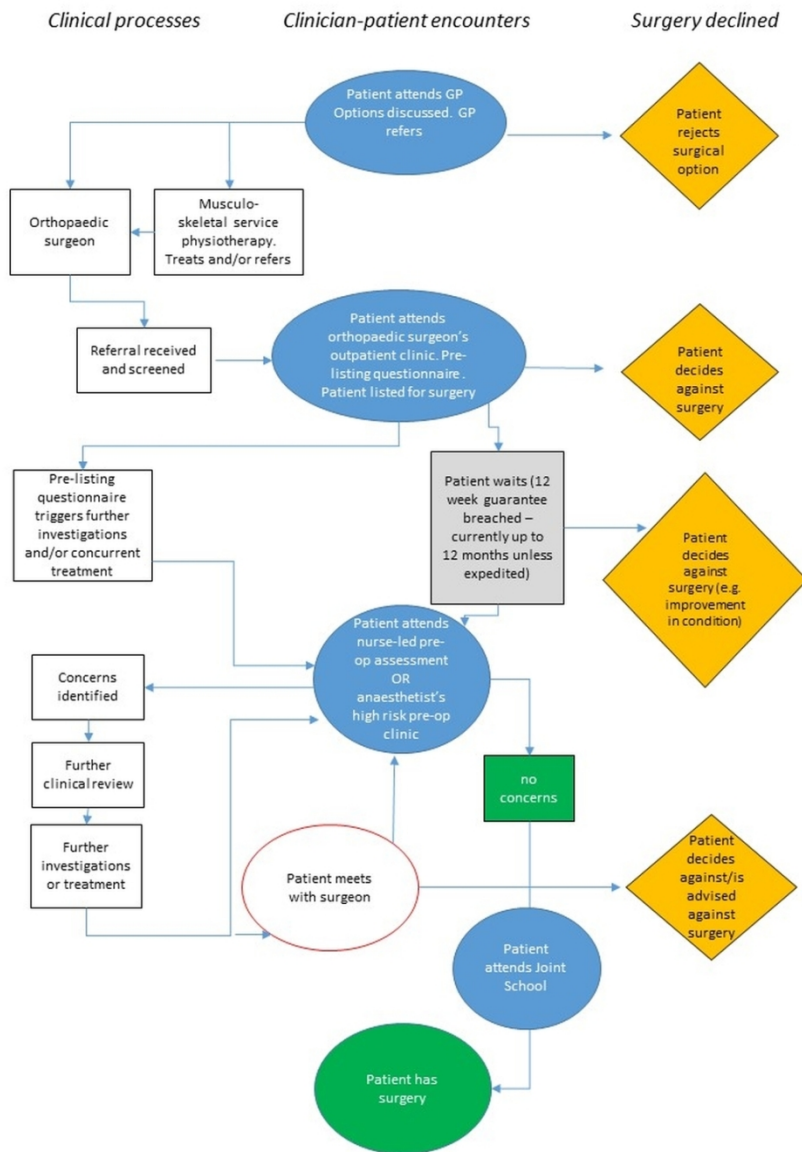

Figure 1: Example decision-making map for orthopaedic surgery

90x129mm (300 x 300 DPI)

Figure 2 – Example decision-making map for colorectal surgery

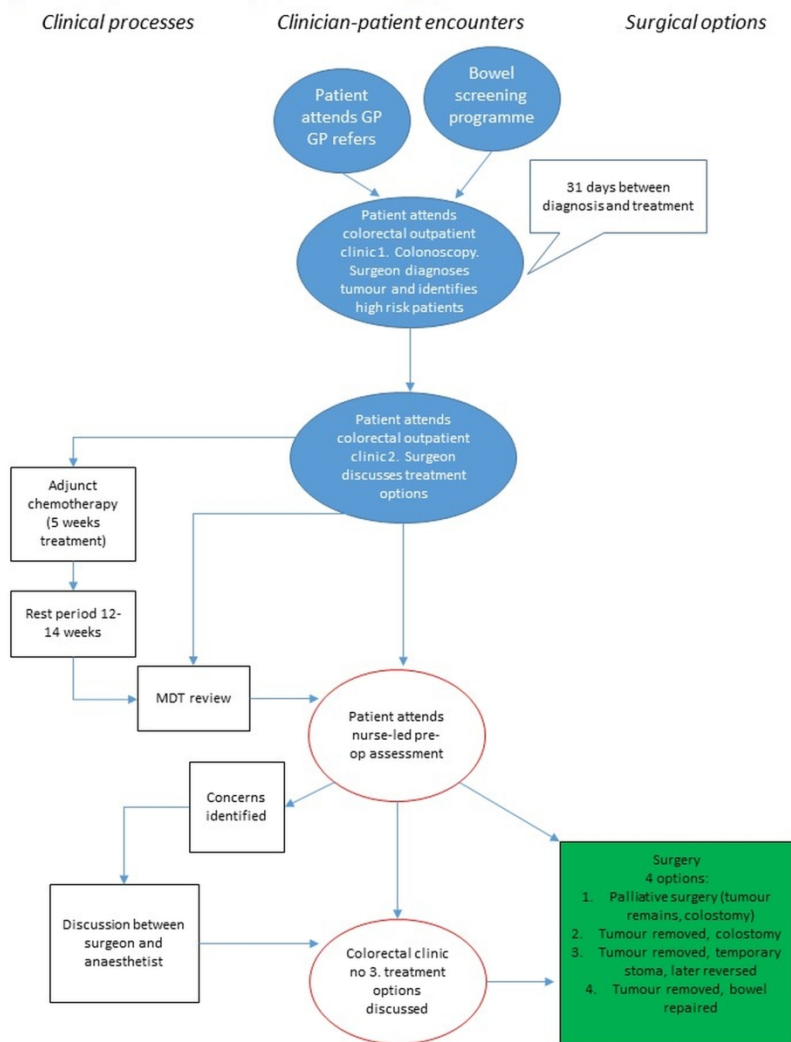

Figure 2: Example decision-making map for colorectal surgery

190x275mm (300 x 300 DPI)



Figure 3 – Example decision-making map for cardiac surgery

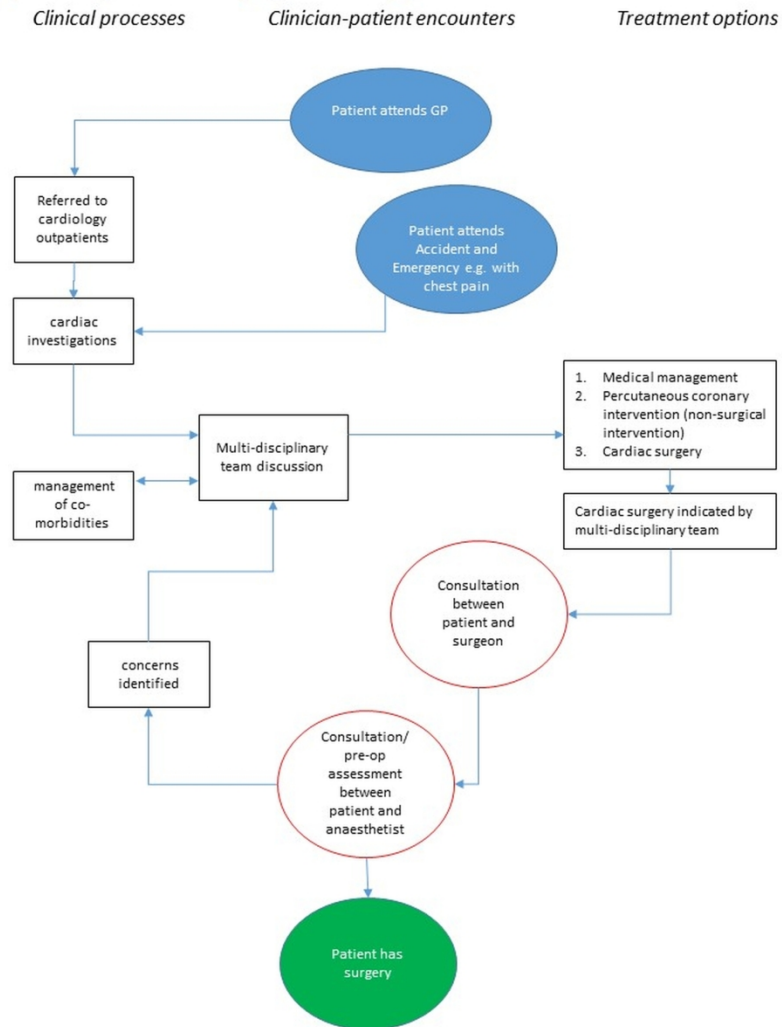

Figure 3: Example decision-making map for cardiac surgery

190x275mm (300 x 300 DPI)

# OSIRIS

## Programme group list

3<sup>rd</sup> February 2020

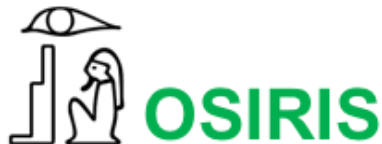

Important note: 'bartshealth.nhs.uk' are liable to change to 'nhs.net' email addresses in the near future. Update these when possible, as peoples emails might change.

**Programme Directors:**

| First Name | Last name | Role in OSIRIS        | Contact details     | Background/Affiliations                                                                                     |
|------------|-----------|-----------------------|---------------------|-------------------------------------------------------------------------------------------------------------|
| Rupert     | Pearse    | Programme Director    | r.pearse@qmul.ac.uk | Professor and consultant in Intensive Care Medicine - Queen Mary University London / Barts Health NHS Trust |
| John       | Prowle    | Programme Co-director | j.prowle@qmul.ac.uk | Senior Clinical Lecturer in Intensive Care Medicine - Queen Mary University London / Barts Health NHS Trust |

**Management group:**

| First Name | Last name  | Role in OSIRIS             | Contact details                | Background/Affiliations                                                                                                                 |
|------------|------------|----------------------------|--------------------------------|-----------------------------------------------------------------------------------------------------------------------------------------|
| Rupert     | Pearse     | Programme Director         | r.pearse@qmul.ac.uk            | Professor and consultant in Intensive Care Medicine - Queen Mary University London / Barts Health NHS Trust                             |
| John       | Prowle     | Programme Co-director      | j.prowle@qmul.ac.uk            | Senior Clinical Lecturer in Intensive Care Medicine - Queen Mary University London / Barts Health NHS Trust                             |
| Tim        | Stephens   | Investigator               | t.t.stephens@qmul.ac.uk        | Nurse Researcher with special interest critical care and perioperative medicine - Queen Mary University London / Barts Health NHS Trust |
| Alex       | Fowler     | Investigator               | a.fowler@qmul.ac.uk            | Research Fellow with special interest in data analysis and systematic reviews - Queen Mary University London / Barts Health NHS Trust   |
| Ruzena     | Uddin      | Senior trials co-ordinator | ruzena.uddin@qmul.ac.uk        | Senior Trial Co-ordinator - Queen Mary University London                                                                                |
| Bethan     | O'Connor   | Trials co-ordinator        | b.griffiths@qmul.ac.uk         | Trial Co-ordinator - Queen Mary University London                                                                                       |
| Mari-Liis  | Pakats     | Research co-ordinator      | m.pakats@qmul.ac.uk            | Senior Trial Co-ordinator - Queen Mary University London                                                                                |
| Alastair   | Somerville | Trials co-ordinator        | alastair.somerville@qmul.ac.uk | Trial Co-ordinator - Queen Mary University London                                                                                       |

**Project 1: Phase 1: Interviews and video recordings of shared decision making encounters between doctors and patients considering major surgery, & Phase 2: Qualitative focus group discussions with patients and doctors after surgery:**

| First Name | Last name      | Role in OSIRIS             | Contact details                       | Background/Affiliations                                                                                                                 |
|------------|----------------|----------------------------|---------------------------------------|-----------------------------------------------------------------------------------------------------------------------------------------|
| Rupert     | Pearse         | Programme Director         | r.pearse@qmul.ac.uk                   | Professor and consultant in Intensive Care Medicine - Queen Mary University London / Barts Health NHS Trust                             |
| John       | Prowle         | Programme Co-director      | j.prowle@qmul.ac.uk                   | Senior Clinical Lecturer in Intensive Care Medicine - Queen Mary University London / Barts Health NHS Trust                             |
| Sara       | Shaw           | Project Chief Investigator | sara.shaw@phc.ox.ac.uk                | Professor of Health & Social Policy with a background in sociology - Oxford University                                                  |
| Tim        | Stephens       | Investigator               | t.t.stephens@qmul.ac.uk               | Nurse Researcher with special interest critical care and perioperative medicine - Queen Mary University London / Barts Health NHS Trust |
| Gemma      | Hughes         | Investigator               | gemma.hughes@phc.ox.ac.uk             | Health services researcher with a background in sociology and NHS management - Oxford University                                        |
| Charlotte  | Thompson-Grant | Administrator              | charlotte.thompson-grant@phc.ox.ac.uk | Personal Assistant and administrator - Oxford University                                                                                |

|          |           |                                       |                                   |                                                                                                             |
|----------|-----------|---------------------------------------|-----------------------------------|-------------------------------------------------------------------------------------------------------------|
| James    | Day       | Local Investigator                    | James.Day@ouh.nhs.uk              | Consultant anaesthetist and intensive care specialist - <i>Oxford University Hospital</i>                   |
| Jennifer | Edwards   | Local Investigator                    | j.edwards10@nhs.net               | Consultant anaesthetist - <i>Royal Alexandra Hospital</i>                                                   |
| Mark     | Edsel     | Local Investigator (until 20/06/2019) | Mark.Edsell@stgeorges.nhs.uk      | Consultant anaesthetist with a special interest in cardiothoracic anaesthesia - <i>St George's Hospital</i> |
| Ester    | Avagliano | Local Investigator (from 11/07/2019)  | Esther.Avagliano@stgeorges.nhs.uk | Consultant anaesthetist with a special interest in cardiothoracic anaesthesia - <i>St George's Hospital</i> |
| Joseph   | Wherton   | Senior Co-Investigator                | joseph.wherton@phc.ox.ac.uk       | Senior researcher with a background in psychology and human-computer interaction - <i>Oxford University</i> |
| Andrew   | Wragg     | Consultant Cardiologist               | Andrew.wragg2@nhs.net             | Honorary Senior Lecturer in Cardiology and Consultant Cardiologist - <i>Barts Health</i>                    |

### **Project 1.3: Comparison of patient and doctor decision making frameworks**

| First Name | Last name  | Role in OSIRIS             | Contact details                      | Background/Affiliations                                                                                                                        |
|------------|------------|----------------------------|--------------------------------------|------------------------------------------------------------------------------------------------------------------------------------------------|
| Rupert     | Pearse     | Programme Director         | r.pearse@qmul.ac.uk                  | Professor and consultant in Intensive Care Medicine - <i>Queen Mary University London / Barts Health NHS Trust</i>                             |
| John       | Prowle     | Programme Co-director      | j.prowle@qmul.ac.uk                  | Senior Clinical Lecturer in Intensive Care Medicine - <i>Queen Mary University London / Barts Health NHS Trust</i>                             |
| Magda      | Osman      | Project Chief Investigator | m.osman@qmul.ac.uk                   | Reader in Experimental Psychology with special interest in decision-making and learning - <i>Queen Mary University London</i>                  |
| Tim        | Stephens   | Investigator               | t.t.stephens@qmul.ac.uk              | Nurse Researcher with special interest critical care and perioperative medicine - <i>Queen Mary University London / Barts Health NHS Trust</i> |
| Agata      | Ludwiczak  | Post-doc researcher        | a.ryterska@qmul.ac.uk                | Post-doctoral researcher with special interest in decision making - <i>Queen Mary University London</i>                                        |
| Joseph     | Wherton    | Senior Co-Investigator     | joseph.wherton@phc.ox.ac.uk          | Senior researcher with a background in psychology and human-computer interaction - <i>Oxford University</i>                                    |
| Steven     | Millington | Clinical advisor           | Steven.Millington@bartshealth.nhs.uk | Consultant Trauma and Orthopaedic Surgeon - <i>Barts Health NHS Trust</i>                                                                      |
| Sammy      | Hanna      | Clinical advisor           | Sammy.Hanna@bartshealth.nhs.uk       | Consultant orthopaedic surgeon with a specialist interest in hip and knee disorders - <i>Barts Health NHS Trust</i>                            |
| Neil       | Roberts    | Clinical advisor           |                                      | Consultant cardiac surgeon - <i>Barts Health NHS Trust</i>                                                                                     |
| Charles    | Knowles    | Clinical advisor           | c.h.knowles@qmul.ac.uk               | Professor of Surgery, Deputy Director of Research and Director of National Bowel Research Centre - <i>Barts Health NHS Trust</i>               |

### **Project 1.4: Discrete choice surgical decision making experiments**

| First Name | Last name | Role in OSIRIS             | Contact details         | Background/Affiliations                                                                                                                        |
|------------|-----------|----------------------------|-------------------------|------------------------------------------------------------------------------------------------------------------------------------------------|
| Rupert     | Pearse    | Programme Director         | r.pearse@qmul.ac.uk     | Professor and consultant in Intensive Care Medicine - <i>Queen Mary University London / Barts Health NHS Trust</i>                             |
| John       | Prowle    | Programme Co-director      | j.prowle@qmul.ac.uk     | Senior Clinical Lecturer in Intensive Care Medicine - <i>Queen Mary University London / Barts Health NHS Trust</i>                             |
| Francesca  | Cornaglia | Project Chief Investigator | f.cornaglia@qmul.ac.uk  | Reader in Economics with a special interest in health economics - <i>Queen Mary University London</i>                                          |
| Tim        | Stephens  | Investigator               | t.t.stephens@qmul.ac.uk | Nurse Researcher with special interest critical care and perioperative medicine - <i>Queen Mary University London / Barts Health NHS Trust</i> |
| Joseph     | Wherton   | Senior Co-                 | joseph.wherton@phc.     | Senior researcher with a background in psychology                                                                                              |



|            |            |                  |                                      |                                                                                                                     |
|------------|------------|------------------|--------------------------------------|---------------------------------------------------------------------------------------------------------------------|
|            |            | Investigator     | ox.ac.uk                             | and human-computer interaction - <i>Oxford University</i>                                                           |
| Steven     | Millington | Clinical advisor | Steven.Millington@bartshealth.nhs.uk | Consultant Trauma and Orthopaedic Surgeon - <i>Barts Health NHS Trust</i>                                           |
| Sammy      | Hanna      | Clinical advisor | Sammy.Hanna@bartshealth.nhs.uk       | Consultant orthopaedic surgeon with a specialist interest in hip and knee disorders - <i>Barts Health NHS Trust</i> |
| Alessandro | Iaria      | Collaborator     | alessandro.iaria@bristol.ac.uk       | Lecturer in economics with a special interest in applied econometrics - <i>Bristol University</i>                   |
| Eugenio    | Merlano    | Collaborator     | e.f.merlanolombana@qmul.ac.uk        | PhD student in the School of Economics and Finance - <i>Queen Mary University London</i>                            |

### **Project 2.1: Long-term surgical outcomes in the UK population**

| First Name | Last name | Role in OSIRIS        | Contact details          | Background/Affiliations                                                                                                                                      |
|------------|-----------|-----------------------|--------------------------|--------------------------------------------------------------------------------------------------------------------------------------------------------------|
| Rupert     | Pearse    | Programme Director    | r.pearse@qmul.ac.uk      | Professor and consultant in Intensive Care Medicine - <i>Queen Mary University London / Barts Health NHS Trust</i>                                           |
| John       | Prowle    | Programme Co-director | j.prowle@qmul.ac.uk      | Senior Clinical Lecturer in Intensive Care Medicine - <i>Queen Mary University London / Barts Health NHS Trust</i>                                           |
| Alex       | Fowler    | Lead Investigator     | a.fowler@qmul.ac.uk      | Research Fellow with special interest in data analysis and systematic reviews - <i>Queen Mary University London / Barts Health NHS Trust</i>                 |
| David      | Cromwell  | Senior Investigator   | dcromwell@rcseng.ac.uk   | Professor of Health Services Research – <i>LSHTM/Royal College of Surgeons</i>                                                                               |
| Kambiz     | Boomla    | Senior Investigator   | k.boomla@qmul.ac.uk      | Clinical Senior Lecturer and GP, Clinical Lead in the Clinical Effectiveness Group - <i>Queen Mary University London</i>                                     |
| Michael    | Gillies   | Collaborator          | michael.gillies@ed.ac.uk | Honorary Clinical Reader, Consultant and Associate Medical Director with special interest in perioperative intensive care - <i>Royal Infirmary Edinburgh</i> |
| Ewen       | Harrison  | Collaborator          | ewen.harrison@gmail.com  | Professor of Surgery and Data Science and Honorary Consultant Surgeon - <i>University of Edinburgh</i>                                                       |

### **Project 2.2: Burden of primary and secondary care for high-risk patients before and after major**

| First Name | Last name | Role in OSIRIS        | Contact details                  | Background/Affiliations                                                                                                                      |
|------------|-----------|-----------------------|----------------------------------|----------------------------------------------------------------------------------------------------------------------------------------------|
| Rupert     | Pearse    | Programme Director    | r.pearse@qmul.ac.uk              | Professor and consultant in Intensive Care Medicine - <i>Queen Mary University London / Barts Health NHS Trust</i>                           |
| John       | Prowle    | Programme Co-director | j.prowle@qmul.ac.uk              | Senior Clinical Lecturer in Intensive Care Medicine - <i>Queen Mary University London / Barts Health NHS Trust</i>                           |
| Alex       | Fowler    | Lead Investigator     | a.fowler@qmul.ac.uk              | Research Fellow with special interest in data analysis and systematic reviews - <i>Queen Mary University London / Barts Health NHS Trust</i> |
| David      | Cromwell  | Senior Investigator   | dcromwell@rcseng.ac.uk           | Professor of Health Services Research – <i>LSHTM/Royal College of Surgeons</i>                                                               |
| Kambiz     | Boomla    | Senior Investigator   | k.boomla@qmul.ac.uk              | Clinical Senior Lecturer and GP, Clinical Lead in the Clinical Effectiveness Group - <i>Queen Mary University London</i>                     |
| Adam       | Brayne    | Collaborator          | abrayne@doctors.org.uk           | Department of infection - <i>Barts Health NHS Trust</i>                                                                                      |
| Bhavi      | Trivedi   | Collaborator          | Bhavi.Trivedi@bartshealth.nhs.uk | Clinical Research Fellow - <i>Barts Health NHS Trust</i>                                                                                     |

### **Project 2.3: Collation of quality of life dataset**

| First Name | Last name | Role in OSIRIS | Contact details     | Background/Affiliations                               |
|------------|-----------|----------------|---------------------|-------------------------------------------------------|
| Rupert     | Pearse    | Programme      | r.pearse@qmul.ac.uk | Professor and consultant in Intensive Care Medicine - |

|        |          |                       |                        |                                                                                                                                              |
|--------|----------|-----------------------|------------------------|----------------------------------------------------------------------------------------------------------------------------------------------|
|        |          | Director              |                        | <i>Queen Mary University London / Barts Health NHS Trust</i>                                                                                 |
| John   | Prowle   | Programme Co-director | j.prowle@qmul.ac.uk    | Senior Clinical Lecturer in Intensive Care Medicine - <i>Queen Mary University London / Barts Health NHS Trust</i>                           |
| Alex   | Fowler   | Lead Investigator     | a.fowler@qmul.ac.uk    | Research Fellow with special interest in data analysis and systematic reviews - <i>Queen Mary University London / Barts Health NHS Trust</i> |
| David  | Cromwell | Senior Investigator   | dcromwell@rcseng.ac.uk | Professor of Health Services Research – <i>LSHTM/Royal College of Surgeons</i>                                                               |
| Kambiz | Boomla   | Senior Investigator   | k.boomla@qmul.ac.uk    | Clinical Senior Lecturer and GP, Clinical Lead in the Clinical Effectiveness Group - <i>Queen Mary University London</i>                     |

### **Project 3.1: Modelling outcomes for high-risk patients contemplating major surgery**

| First Name | Last name | Role in OSIRIS         | Contact details                   | Background/Affiliations                                                                                                          |
|------------|-----------|------------------------|-----------------------------------|----------------------------------------------------------------------------------------------------------------------------------|
| Rupert     | Pearse    | Programme Director     | r.pearse@qmul.ac.uk               | Professor and consultant in Intensive Care Medicine - <i>Queen Mary University London / Barts Health NHS Trust</i>               |
| John       | Prowle    | Programme Co-director  | j.prowle@qmul.ac.uk               | Senior Clinical Lecturer in Intensive Care Medicine - <i>Queen Mary University London / Barts Health NHS Trust</i>               |
| William    | Marsh     | Lead Investigator      | d.w.r.marsh@qmul.ac.uk            | Senior lecturer with special interest in decision support models - <i>Queen Mary University London</i>                           |
| Charles    | Knowles   | Clinical Advisor       | c.h.knowles@qmul.ac.uk            | Professor of Surgery, Deputy Director of Research and Director of National Bowel Research Centre - <i>Barts Health NHS Trust</i> |
| Joseph     | Wherton   | Senior Co-Investigator | joseph.wherton@phc.ox.ac.uk       | Senior researcher with a background in psychology and human-computer interaction - <i>Oxford University</i>                      |
| Neil       | MacDonald | Clinical Advisor       | Neil.Macdonald@bartshealth.nhs.uk | Consultant anaesthetist - <i>Barts Health NHS Trust</i>                                                                          |
| Sara       | Shaw      | Senior Co-Investigator | sara.shaw@phc.ox.ac.uk            | Professor of Health & Social Policy with a background in sociology - <i>Oxford University</i>                                    |

### **Project 3.2: Co-design of the decision support intervention and implementation planning**

| First Name | Last name | Role in OSIRIS         | Contact details                   | Background/Affiliations                                                                                                          |
|------------|-----------|------------------------|-----------------------------------|----------------------------------------------------------------------------------------------------------------------------------|
| Rupert     | Pearse    | Programme Director     | r.pearse@qmul.ac.uk               | Professor and consultant in Intensive Care Medicine - <i>Queen Mary University London / Barts Health NHS Trust</i>               |
| John       | Prowle    | Programme Co-director  | j.prowle@qmul.ac.uk               | Senior Clinical Lecturer in Intensive Care Medicine - <i>Queen Mary University London / Barts Health NHS Trust</i>               |
| William    | Marsh     | Lead Investigator      | d.w.r.marsh@qmul.ac.uk            | Senior lecturer with special interest in decision support models - <i>Queen Mary University London</i>                           |
| Charles    | Knowles   | Clinical Advisor       | c.h.knowles@qmul.ac.uk            | Professor of Surgery, Deputy Director of Research and Director of National Bowel Research Centre - <i>Barts Health NHS Trust</i> |
| Joseph     | Wherton   | Senior Co-Investigator | joseph.wherton@phc.ox.ac.uk       | Senior researcher with a background in psychology and human-computer interaction - <i>Oxford University</i>                      |
| Neil       | MacDonald | Clinical Advisor       | Neil.Macdonald@bartshealth.nhs.uk | Consultant anaesthetist - <i>Barts Health NHS Trust</i>                                                                          |
| Sara       | Shaw      | Senior Co-Investigator | sara.shaw@phc.ox.ac.uk            | Professor of Health & Social Policy with a background in sociology - <i>Oxford University</i>                                    |

### **Project 4.1: Testing the feasibility of the decision support intervention**

| First Name | Last name | Role      | Contact details     | Affiliations                                          |
|------------|-----------|-----------|---------------------|-------------------------------------------------------|
| Rupert     | Pearse    | Programme | r.pearse@qmul.ac.uk | Professor and consultant in Intensive Care Medicine - |

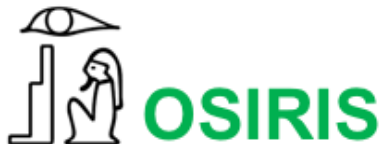

|         |           |                            |                                  |                                                                                                                                                |
|---------|-----------|----------------------------|----------------------------------|------------------------------------------------------------------------------------------------------------------------------------------------|
|         |           | Director                   |                                  | <i>Queen Mary University London / Barts Health NHS Trust</i>                                                                                   |
| John    | Prowle    | Programme Co-director      | j.prowle@qmul.ac.uk              | Senior Clinical Lecturer in Intensive Care Medicine - <i>Queen Mary University London / Barts Health NHS Trust</i>                             |
| Tim     | Stephens  | Investigator               | t.t.stephens@qmul.ac.uk          | Nurse Researcher with special interest critical care and perioperative medicine - <i>Queen Mary University London / Barts Health NHS Trust</i> |
| Ann     | Thomson   | Senior trials co-ordinator | ann.thomson@qmul.ac.uk           | Senior Trial Manager - <i>Queen Mary University London</i>                                                                                     |
| Mel     | Smuk      | Statistician               | m.smuk@qmul.ac.uk                | Senior Statistician and Lecturer in Medical Statistics - <i>Queen Mary University London</i>                                                   |
| Charles | Knowles   | Clinical Advisor           | c.h.knowles@qmul.ac.uk           | Professor of Surgery, Deputy Director of Research and Director of National Bowel Research Centre - <i>Barts Health NHS Trust</i>               |
| Neil    | MacDonald | Clinical Advisor           | Neil.Macdonald@barthealth.nhs.uk | Consultant anaesthetist - <i>Barts Health NHS Trust</i>                                                                                        |
| Sandra  | Eldridge  | Senior Co-Investigator     | s.eldridge@qmul.ac.uk            | Professor of Biostatistics and Director of the Pragmatic Clinical Trials Unit, QMUL - <i>Queen Mary University London</i>                      |
| Sara    | Shaw      | Senior Co-Investigator     | sara.shaw@phc.ox.ac.uk           | Professor of Health & Social Policy with a background in sociology - <i>Oxford University</i>                                                  |

#### **Project 4.2: Cluster randomised trial**

| First Name | Surname   | Role in OSIRIS             | Contact details                  | Background/Affiliations                                                                                                                        |
|------------|-----------|----------------------------|----------------------------------|------------------------------------------------------------------------------------------------------------------------------------------------|
| Rupert     | Pearse    | Programme Director         | r.pearse@qmul.ac.uk              | Professor and consultant in Intensive Care Medicine - <i>Queen Mary University London / Barts Health NHS Trust</i>                             |
| John       | Prowle    | Programme Co-director      | j.prowle@qmul.ac.uk              | Senior Clinical Lecturer in Intensive Care Medicine - <i>Queen Mary University London / Barts Health NHS Trust</i>                             |
| Tim        | Stephens  | Investigator               | t.t.stephens@qmul.ac.uk          | Nurse Researcher with special interest critical care and perioperative medicine - <i>Queen Mary University London / Barts Health NHS Trust</i> |
| Ann        | Thomson   | Senior trials co-ordinator | ann.thomson@qmul.ac.uk           | Senior Trial Manager - <i>Queen Mary University London</i>                                                                                     |
| Mel        | Smuk      | Statistician               | m.smuk@qmul.ac.uk                | Senior Statistician and Lecturer in Medical Statistics - <i>Queen Mary University London</i>                                                   |
| Charles    | Knowles   | Clinical Advisor           | c.h.knowles@qmul.ac.uk           | Professor of Surgery, Deputy Director of Research and Director of National Bowel Research Centre - <i>Barts Health NHS Trust</i>               |
| Neil       | MacDonald | Clinical Advisor           | Neil.Macdonald@barthealth.nhs.uk | Consultant anaesthetist - <i>Barts Health NHS Trust</i>                                                                                        |
| Sandra     | Eldridge  | Senior Co-Investigator     | s.eldridge@qmul.ac.uk            | Professor of Biostatistics and Director of the Pragmatic Clinical Trials Unit, QMUL - <i>Queen Mary University London</i>                      |
| Sara       | Shaw      | Senior Co-Investigator     | sara.shaw@phc.ox.ac.uk           | Professor of Health & Social Policy with a background in sociology - <i>Oxford University</i>                                                  |

#### **Project 4.3: Mixed method process evaluation of the OSIRIS cluster trial**

| First Name | Surname  | Role in OSIRIS        | Contact details         | Background/Affiliations                                                                                                                        |
|------------|----------|-----------------------|-------------------------|------------------------------------------------------------------------------------------------------------------------------------------------|
| Rupert     | Pearse   | Programme Director    | r.pearse@qmul.ac.uk     | Professor and consultant in Intensive Care Medicine - <i>Queen Mary University London / Barts Health NHS Trust</i>                             |
| John       | Prowle   | Programme Co-director | j.prowle@qmul.ac.uk     | Senior Clinical Lecturer in Intensive Care Medicine - <i>Queen Mary University London / Barts Health NHS Trust</i>                             |
| Tim        | Stephens | Investigator          | t.t.stephens@qmul.ac.uk | Nurse Researcher with special interest critical care and perioperative medicine - <i>Queen Mary University London / Barts Health NHS Trust</i> |

|         |           |                            |                                  |                                                                                                                                  |
|---------|-----------|----------------------------|----------------------------------|----------------------------------------------------------------------------------------------------------------------------------|
| Ann     | Thomson   | Senior trials co-ordinator | ann.thomson@qmul.ac.uk           | Senior Trial Manager - <i>Queen Mary University London</i>                                                                       |
| Mel     | Smuk      | Statistician               | m.smuk@qmul.ac.uk                | Senior Statistician and Lecturer in Medical Statistics - <i>Queen Mary University London</i>                                     |
| Charles | Knowles   | Clinical Advisor           | c.h.knowles@qmul.ac.uk           | Professor of Surgery, Deputy Director of Research and Director of National Bowel Research Centre - <i>Barts Health NHS Trust</i> |
| Neil    | MacDonald | Clinical Advisor           | Neil.Macdonald@barthealth.nhs.uk | Consultant anaesthetist - <i>Barts Health NHS Trust</i>                                                                          |
| Sandra  | Eldridge  | Senior Co-Investigator     | s.eldridge@qmul.ac.uk            | Professor of Biostatistics and Director of the Pragmatic Clinical Trials Unit, QMUL - <i>Queen Mary University London</i>        |
| Sara    | Shaw      | Senior Co-Investigator     | sara.shaw@phc.ox.ac.uk           | Professor of Health & Social Policy with a background in sociology - <i>Oxford University</i>                                    |

#### **Project 4.4: Health economic analyses**

| First Name | Surname   | Role in OSIRIS          | Contact details        | Background/Affiliations                                                                                                        |
|------------|-----------|-------------------------|------------------------|--------------------------------------------------------------------------------------------------------------------------------|
| Rupert     | Pearse    | Programme Director      | r.pearse@qmul.ac.uk    | Professor and consultant in Intensive Care Medicine - <i>Queen Mary University London / Barts Health NHS Trust</i>             |
| John       | Prowle    | Programme Co-director   | j.prowle@qmul.ac.uk    | Senior Clinical Lecturer in Intensive Care Medicine - <i>Queen Mary University London / Barts Health NHS Trust</i>             |
| Borislava  | Mihaylova | Senior health economist | b.mihaylova@qmul.ac.uk | Chair and Professor of Health Economics at the Centre for Primary Care and Public Health - <i>Queen Mary University London</i> |
| Vladimir   | Gordeev   | Health economist        | v.gordeev@qmul.ac.uk   | Senior Health Economist - <i>Queen Mary University London</i>                                                                  |
| Sandra     | Eldridge  | Senior Co-Investigator  | s.eldridge@qmul.ac.uk  | Professor of Biostatistics and Director of the Pragmatic Clinical Trials Unit, QMUL - <i>Queen Mary University London</i>      |

#### **Programme Steering Committee (PSC) members:**

| First Name | Surname   | Role in OSIRIS                  | Contact details            | Background/Affiliations                                                                                            |
|------------|-----------|---------------------------------|----------------------------|--------------------------------------------------------------------------------------------------------------------|
| Rupert     | Pearse    | Programme Director              | r.pearse@qmul.ac.uk        | Professor and consultant in Intensive Care Medicine - <i>Queen Mary University London / Barts Health NHS Trust</i> |
| John       | Prowle    | Programme Co-director           | j.prowle@qmul.ac.uk        | Senior Clinical Lecturer in Intensive Care Medicine - <i>Queen Mary University London / Barts Health NHS Trust</i> |
| Julian     | Bion      | Chair                           | J.F.BION@bham.ac.uk        | Professor Of Intensive Care Medicine - <i>University of Birmingham</i>                                             |
| Obi        | Ukoumunne | Independent Statistician member | o.c.ukoumunne@exeter.ac.uk | Associate Professor in Medical Statistics - <i>University of Exeter</i>                                            |
| Michael    | Swart     | Independent member              | michael.swart@nhs.uk       | Consultant in Anaesthesia and Critical Care Medicine - <i>Torbay and South Devon NHS Foundation Trust</i>          |
| John       | Hitchman  | Lay member                      | jmhitchman@aol.com         | N/A                                                                                                                |

#### **Patient and public involvement group (PPI) members:**

| First Name | Surname  | Role in OSIRIS | Contact details                | Background/Affiliations                                                                                                                        |
|------------|----------|----------------|--------------------------------|------------------------------------------------------------------------------------------------------------------------------------------------|
| Lesley     | Booth    | PPI organiser  | lesley@bowelcancerresearch.org | Lead in Patient and Public Involvement – <i>Bowel &amp; Cancer Research</i>                                                                    |
| Tim        | Stephens | PPI organiser  | t.t.stephens@qmul.ac.uk        | Nurse Researcher with special interest critical care and perioperative medicine - <i>Queen Mary University London / Barts Health NHS Trust</i> |
| Leslie     | Everest  | PPI Chair      | leslieeverest2017@g            | Extensive experience in decision making for high-risk                                                                                          |



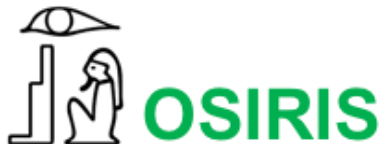

|       |         |           |                                     |                                                                |
|-------|---------|-----------|-------------------------------------|----------------------------------------------------------------|
|       |         |           | mail.com                            | surgery and sat on previous PPI committees                     |
| Nigel | Horwood | PPI Chair | nigelhorwood@btinternet.com         | Extensive experience in decision making for high-risk surgery. |
| Len   | Evans   | PPI       | lenevans1@btinternet.com            | Extensive experience in decision making for high-risk surgery. |
| Gael  | Ramsey  | PPI       | gaelramsey@msn.com                  | Extensive experience in decision making for high-risk surgery. |
| Eve   | Smyth   | PPI       | fairlady@adrianjs.free-online.co.uk | Extensive experience in decision making for high-risk surgery. |
| Brian | Morris  | PPI       | bmazing@yahoo.co.uk                 | Extensive experience in decision making for high-risk surgery. |

For peer review only

## Standards for Reporting Qualitative Research (SRQR)

O'Brien B.C., Harris, I.B., Beckman, T.J., Reed, D.A., & Cook, D.A. (2014). Standards for reporting qualitative research: a synthesis of recommendations. *Academic Medicine*, 89(9), 1245-1251.

| No. | Topic                                        | Item                                                                                                                                                                                                                                                                                                                                     | Page/Line                  |
|-----|----------------------------------------------|------------------------------------------------------------------------------------------------------------------------------------------------------------------------------------------------------------------------------------------------------------------------------------------------------------------------------------------|----------------------------|
|     | <b>Title and abstract</b>                    |                                                                                                                                                                                                                                                                                                                                          |                            |
| S1  | Title                                        | Concise description of the nature and topic of the study identifying the study as qualitative or indicating the approach (e.g., ethnography, grounded theory) or data collection methods (e.g., interview, focus group) is recommended                                                                                                   | Page 1                     |
| S2  | Abstract                                     | Summary of key elements of the study using the abstract format of the intended publication; typically includes objective, methods, results, and conclusions                                                                                                                                                                              | Page 3                     |
|     | <b>Introduction</b>                          |                                                                                                                                                                                                                                                                                                                                          |                            |
| S3  | Problem formulation                          | Description and significance of the problem/phenomenon studied; review of relevant theory and empirical work; problem statement                                                                                                                                                                                                          | Pps 5-7<br>Page 9          |
| S4  | Purpose or research question                 | Purpose of the study and specific objectives or questions                                                                                                                                                                                                                                                                                | Page 8                     |
|     | <b>Methods</b>                               |                                                                                                                                                                                                                                                                                                                                          |                            |
| S5  | Qualitative approach and research paradigm   | Qualitative approach (e.g., ethnography, grounded theory, case study, phenomenology, narrative research) and guiding theory if appropriate; identifying the research paradigm (e.g., positivist, constructivist/interpretivist) is also recommended                                                                                      | Pps 8-9                    |
| S6  | Researcher characteristics and reflexivity   | Researchers' characteristics that may influence the research, including personal attributes, qualifications/experience, relationship with participants, assumptions, or presuppositions; potential or actual interaction between researchers' characteristics and the research questions, approach, methods, results, or transferability | Page 8                     |
| S7  | Context                                      | Setting/site and salient contextual factors; rationale <sup>a</sup>                                                                                                                                                                                                                                                                      | Page 9-10                  |
| S8  | Sampling strategy                            | How and why research participants, documents, or events were selected; criteria for deciding when no further sampling was necessary (e.g., sampling saturation); rationale <sup>a</sup>                                                                                                                                                  | Pps 10-12,<br>Table 1, p21 |
| S9  | Ethical issues pertaining to human subjects  | Documentation of approval by an appropriate ethics review board and participant consent, or explanation for lack thereof; other confidentiality and data security issues                                                                                                                                                                 | Page 15                    |
| S10 | Data collection methods                      | Types of data collected; details of data collection procedures including (as appropriate) start and stop dates of data collection and analysis, iterative process, triangulation of sources/methods, and modification of procedures in response to evolving study findings; rationale <sup>a</sup>                                       | Pps 10-12                  |
| S11 | Data collection instruments and technologies | Description of instruments (e.g., interview guides, questionnaires) and devices (e.g., audio recorders) used for data collection; if/how the instrument(s) changed over the course of the study                                                                                                                                          | Pps 11-12                  |
| S12 | Units of study                               | Number and relevant characteristics of participants, documents, or events included in the study; level of participation (could be reported in results)                                                                                                                                                                                   | Table 1, p21               |

|                         |                                                                                              |                                                                                                                                                                                                                                                                                                       |                            |
|-------------------------|----------------------------------------------------------------------------------------------|-------------------------------------------------------------------------------------------------------------------------------------------------------------------------------------------------------------------------------------------------------------------------------------------------------|----------------------------|
| S13                     | Data processing                                                                              | Methods for processing data prior to and during analysis, including transcription, data entry, data management and security, verification of data integrity, data coding, and anonymization/deidentification of excerpts                                                                              | Page 13<br>Table 2, p22    |
| S14                     | Data analysis                                                                                | Process by which inferences, themes, etc., were identified and developed, including researchers involved in data analysis; usually references a specific paradigm or approach; rationale <sup>a</sup>                                                                                                 | Pps 12-14                  |
| S15                     | Techniques to enhance trustworthiness                                                        | Techniques to enhance trustworthiness and credibility of data analysis (e.g., member checking, audit trail, triangulation); rationale <sup>a</sup>                                                                                                                                                    | Page 12<br>Table 2, p22    |
| <b>Results/Findings</b> |                                                                                              |                                                                                                                                                                                                                                                                                                       |                            |
| S16                     | Synthesis and interpretation                                                                 | Main findings (e.g., interpretations, inferences, and themes); might include development of a theory or model, or integration with prior research or theory                                                                                                                                           | N/a –<br>protocol<br>paper |
| S17                     | Links to empirical data                                                                      | Evidence (e.g., quotes, field notes, text excerpts, photographs) to substantiate analytic findings                                                                                                                                                                                                    | N/a protocol<br>paper      |
| <b>Discussion</b>       |                                                                                              |                                                                                                                                                                                                                                                                                                       |                            |
| S18                     | Integration with prior work, implications, transferability, and contribution(s) to the field | Short summary of main findings; explanation of how findings and conclusions connect to, support, elaborate on, or challenge conclusions of earlier scholarship; discussion of scope of application/generalizability; identification of unique contribution(s) to scholarship in a discipline or field | N/a –<br>protocol<br>paper |
| S19                     | Limitations                                                                                  | Trustworthiness and limitations of findings                                                                                                                                                                                                                                                           | N/a –<br>protocol<br>paper |
| <b>Other</b>            |                                                                                              |                                                                                                                                                                                                                                                                                                       |                            |
| S20                     | Conflicts of interest                                                                        | Potential sources of influence or perceived influence on study conduct and conclusions; how these were managed                                                                                                                                                                                        | Page 17                    |
| S21                     | Funding                                                                                      | Sources of funding and other support; role of funders in data collection, interpretation, and reporting                                                                                                                                                                                               | Page 17                    |

<sup>a</sup>The rationale should briefly discuss the justification for choosing that theory, approach, method, or technique rather than other options available, the assumptions and limitations implicit in those choices, and how those choices influence study conclusions and transferability. As appropriate, the rationale for several items might be discussed together.

# BMJ Open

## Understanding decision making about major surgery: protocol for a qualitative study of shared decision making by high-risk patients and their clinical teams

|                                 |                                                                                                                                                                                                                                                                                                                                                                                                                                                                                                                                                                                                                                                                                                                                                                                               |
|---------------------------------|-----------------------------------------------------------------------------------------------------------------------------------------------------------------------------------------------------------------------------------------------------------------------------------------------------------------------------------------------------------------------------------------------------------------------------------------------------------------------------------------------------------------------------------------------------------------------------------------------------------------------------------------------------------------------------------------------------------------------------------------------------------------------------------------------|
| Journal:                        | <i>BMJ Open</i>                                                                                                                                                                                                                                                                                                                                                                                                                                                                                                                                                                                                                                                                                                                                                                               |
| Manuscript ID                   | bmjopen-2019-033703.R2                                                                                                                                                                                                                                                                                                                                                                                                                                                                                                                                                                                                                                                                                                                                                                        |
| Article Type:                   | Protocol                                                                                                                                                                                                                                                                                                                                                                                                                                                                                                                                                                                                                                                                                                                                                                                      |
| Date Submitted by the Author:   | 11-Mar-2020                                                                                                                                                                                                                                                                                                                                                                                                                                                                                                                                                                                                                                                                                                                                                                                   |
| Complete List of Authors:       | Shaw, Sara; University of Oxford, Nuffield Department of Primary Care Health Sciences<br>Hughes, Gemma; University of Oxford, Nuffield Department of Primary Care Health Sciences<br>Stephens, Tim; Queen Mary University of London<br>Pearse, Rupert; Queen Mary University of London, Barts and the London School of Medicine & Dentistry<br>Prowle, John; Queen Mary University of London, Barts and the London School of Medicine & Dentistry<br>Ashcroft, Richard; City University of London, School of Law<br>Avagliano, Ester; St. George's University Hospitals Foundation Trust<br>Day, James; John Radcliffe Hospital<br>Edsell, Mark; St. George's University Hospitals Foundation Trust<br>Edwards, Jennifer; Royal Alexandra Hospital<br>Everest, Leslie; Patient representative |
| <b>Primary Subject Heading</b>: | Surgery                                                                                                                                                                                                                                                                                                                                                                                                                                                                                                                                                                                                                                                                                                                                                                                       |
| Secondary Subject Heading:      | Health services research, Qualitative research, Sociology                                                                                                                                                                                                                                                                                                                                                                                                                                                                                                                                                                                                                                                                                                                                     |
| Keywords:                       | shared decision making, Adult surgery < SURGERY, high risk, QUALITATIVE RESEARCH, communication                                                                                                                                                                                                                                                                                                                                                                                                                                                                                                                                                                                                                                                                                               |
|                                 |                                                                                                                                                                                                                                                                                                                                                                                                                                                                                                                                                                                                                                                                                                                                                                                               |

SCHOLARONE™  
Manuscripts



I, the Submitting Author has the right to grant and does grant on behalf of all authors of the Work (as defined in the below author licence), an exclusive licence and/or a non-exclusive licence for contributions from authors who are: i) UK Crown employees; ii) where BMJ has agreed a CC-BY licence shall apply, and/or iii) in accordance with the terms applicable for US Federal Government officers or employees acting as part of their official duties; on a worldwide, perpetual, irrevocable, royalty-free basis to BMJ Publishing Group Ltd ("BMJ") its licensees and where the relevant Journal is co-owned by BMJ to the co-owners of the Journal, to publish the Work in this journal and any other BMJ products and to exploit all rights, as set out in our [licence](#).

The Submitting Author accepts and understands that any supply made under these terms is made by BMJ to the Submitting Author unless you are acting as an employee on behalf of your employer or a postgraduate student of an affiliated institution which is paying any applicable article publishing charge ("APC") for Open Access articles. Where the Submitting Author wishes to make the Work available on an Open Access basis (and intends to pay the relevant APC), the terms of reuse of such Open Access shall be governed by a Creative Commons licence – details of these licences and which [Creative Commons](#) licence will apply to this Work are set out in our licence referred to above.

Other than as permitted in any relevant BMJ Author's Self Archiving Policies, I confirm this Work has not been accepted for publication elsewhere, is not being considered for publication elsewhere and does not duplicate material already published. I confirm all authors consent to publication of this Work and authorise the granting of this licence.

## Protocol paper for BMJ Open

# Understanding decision making about major surgery: protocol for a qualitative study of shared decision making by high-risk patients and their clinical teams

---

Sara E Shaw (*Associate Professor*)<sup>1</sup>

Gemma Hughes (*Postdoctoral researcher*)<sup>1</sup>

Tim Stephens (*Doctoral researcher*)<sup>2</sup>

Rupert Pearse (*Professor*)<sup>2</sup>

John Prowle (*Senior Clinical Lecturer*)<sup>2</sup>

Richard Ashcroft (*Professor*)<sup>3</sup>

Ester Avagliano (*Consultant Anaesthetist*)<sup>5</sup>

James Day (*Consultant in Intensive Care/Anaesthetics*)<sup>4</sup>

Mark Edsell (*Consultant in Anaesthesia & Critical Care*)<sup>5</sup>

Jennifer Edwards (*Consultant Anaesthetist*)<sup>6</sup>

Leslie Everest (*Patient representative*)

OSIRIS Programme Group

### Affiliations

1 Nuffield Department of Primary Care Health Sciences, University of Oxford, Oxford  
OX2 6GG, UK

2 William Harvey Research Institute, Queen Mary University of London, EC1M 6BQ, UK

- 1
- 2
- 3       3       City Law School, City University, London, UK
- 4
- 5       4       John Radcliffe Hospital, Headley Way, Headington, Oxford OX3 9DU
- 6
- 7       5       St. George's University Hospitals Foundation Trust, Blackshaw Road, Tooting, London
- 8               SW17 0QT
- 9
- 10
- 11       6       Royal Alexandra Hospital, Corsebar Road, Paisley, PA2 9PN
- 12
- 13
- 14

15  
16       Corresponding author: [sara.shaw@phc.ox.ac.uk](mailto:sara.shaw@phc.ox.ac.uk)

17  
18  
19  
20  
21  
22  
23  
24  
25  
26  
27  
28  
29  
30  
31  
32  
33  
34  
35  
36  
37  
38  
39  
40  
41  
42  
43  
44  
45  
46  
47  
48  
49  
50  
51  
52  
53  
54  
55  
56  
57  
58  
59  
60

For peer review only

## ABSTRACT (299/300)

### Introduction

Surgical treatments are being offered to more patients than ever before, and increasingly to high-risk patients (typically multi-morbid and over 75). Shared decision making is seen as essential practice. However, little is currently known about what 'good' shared decision making involves nor how it applies in the context of surgery for high-risk patients (typically older patients with multi-morbidity). This new study aims to identify how high-risk patients, their families and clinical teams negotiate decision making for major surgery.

### Methods and analysis

Focusing on major joint replacement, colo-rectal and cardiac surgery, we use qualitative methods to explore how patients, their families and clinicians negotiate decision making (including interactional, communicative and informational aspects and the extent to which these are perceived as shared) and reflect back on the decisions they made. Phase 1 involves video-recording 15 decision making encounters about major surgery between patients, their carers/families and clinicians; followed by up to 90 interviews (with the same patient, carer and clinician participants) immediately after a decision has been made and again 3-6 months later. Phase 2 involves focus groups with a wider group of (up to 90) patients and (up to 30) clinicians to test out emerging findings and inform development of shared decision making scenarios (3-5 summary descriptions of how decisions are made).

### Ethics and dissemination

The study forms the first part in a six-year programme of research, *Optimising Shared decision-making for high Risk Surgery* (OSIRIS). Ethical challenges around involving patients at a challenging time in their lives will be overseen by the programme steering committee, which includes strong patient representation and a lay chair. In addition to academic outputs, we will produce a typology of decision making scenarios for major surgery to feed back to patients, professionals and service providers and inform subsequent work in the OSIRIS programme.



1  
2  
3 Key words: shared decision making, distributed decision making, high risk, adult surgery,  
4 communication, qualitative research,  
5  
6  
7  
8  
9

## 10 ARTICLE SUMMARY

11  
12  
13

### 14 Strengths and limitations of this study

15

- 16 • New study focused on decision making about major surgery with high-risk patients.
- 17 • Novel qualitative design, combining video-recording of decision making encounters, with  
18 individual and group interviews.
- 19 • Guided by theory, which recognises that decisions about surgery rarely occur at neat  
20 'decision points', involve various stages of deliberation, and are shaped by interaction  
21 with many (clinical and non-clinical) individuals.
- 22 • Informs a programme of work, *Optimising Shared decision-making for high Risk Surgery*,  
23 including development of a decision support intervention to improve shared decision  
24 making about elective major surgery.  
25  
26  
27  
28  
29  
30  
31  
32  
33  
34  
35  
36  
37  
38  
39  
40  
41  
42

43 Word count (exc title page, abstract, references, figures and tables): 3998  
44  
45  
46  
47  
48  
49  
50  
51  
52  
53  
54  
55  
56  
57  
58  
59  
60

## INTRODUCTION

Shared decision making aims to bring patient values and preferences together with clinician expertise to determine the best care package for the individual concerned. It is not new, building on influential work published since the 1980s (eg, [1-3]). The recent prominence given to shared decision making has accompanied a broader shift towards 'patient-centred care', along with a rise in patient advocacy and increased involvement in resource allocation [4-9]. In the UK, following a landmark legal case [10], standards in respect of the consent process have shifted away from what a body of professionals deem relevant (paternalism) to what a reasonable patient would want or need to know (shared decision making) [11-13].

In surgery, shared decision making is espoused as an essential practice on the basis that it can improve patient satisfaction, moderate use of surgery and reduce costs. It is increasingly offered to older patients who are often (but not always) at higher risk of poor postoperative outcomes. Around 1.5 million major surgical procedures are now performed each year in the UK [14], with 250,000 at high risk of post-operative complications [15]. Even when surgery and anaesthesia are straightforward, one in three high-risk patients develops serious medical complications in the days following surgery [16]. These complications delay recovery, with prolonged hospital stays and a decline in functional independence once patients return home. Critically, many high-risk patients never recover from these adverse effects, suffering significant reductions in long-term quality of life and survival [16, 17]. For some, surgery is not the successful treatment they hoped for, with feelings of guilt or regret commonplace [18]. Doctors recognise the need to help improve decision making for this patient group but often feel ill-equipped to do so [19], with surgeons and anaesthetists currently lacking the expertise to make informed judgements about the risks such patients face. The problem is becoming more frequent as more patients living with severe chronic disease are offered surgical treatments. In sum, many people are having high-risk surgery (ie, major surgery with high-risk patients) and are sometimes regretting doing so, with this problem likely to increase.

Shared decision making is perceived as a potential means of addressing this but the impact of shared decision making is currently unclear. Three systematic reviews [20-22] have shown that patients and clinicians generally value it and that it has potential to both improve the quality of decisions (largely via improved information sharing and increased knowledge [21]),

1  
2  
3 and lessen conflict in decision making about preference-sensitive surgery (ie, where there is  
4 no one best available treatment). Overall reviews suggest that it is the quality of the decision  
5 making process, over the decision itself, that is key to improving outcomes. However, studies  
6 have tended to focus on a small number of clinical areas (eg, breast cancer, osteoarthritis);  
7 orient to decision making between the patient and physician alone; and assess outcomes  
8 allied to decision making rather than the process or experience *per se* (eg, of the 24 studies  
9 identified by Boss et al [21], 17 measured outcomes on the effectiveness of the decision aid  
10 without directly assessing doctor-patient interactions). Few studies have linked surgical  
11 outcomes and decision making processes, considered potentially relevant demographic  
12 characteristics (eg, age, socioeconomic status, ethnicity), or conducted follow up to consider  
13 what decisions about surgery mean in the context of peoples' lives. Recently, some authors  
14 have called for a more multi-faceted approach that further considers organisational and  
15 system-level, as well as social and temporal aspects, of shared decision making including:  
16 relevant guidelines, workflows across the clinical team (eg, involving anaesthetists), the  
17 extended care pathway (eg, from pre-operative assessment through to postoperative  
18 de/prescribing), and the influence of families [4, 23-26].

19  
20  
21  
22  
23  
24  
25  
26  
27  
28  
29  
30  
31  
32  
33 Interactions between clinicians and patients prior to making a decision about surgery are  
34 important (eg, we know that good communication is associated with increased professional  
35 and patient satisfaction [27]), but rarely the focus of research. To date there has been limited  
36 research on communication between clinicians and patients in the context of shared decision  
37 making for surgery. What little there is has shown that communication practices often  
38 inadequately support preoperative shared decision making about surgery. Most (but not all)  
39 patients prefer to share in decision making but do not always have the chance to do so [8].  
40 Surgeons rarely employ a fully collaborative decision-making process [28, 29], instead  
41 disclosing procedural risks and helping patients make choices by relying on standard practices  
42 (eg, informed consent) or communication practices such as the 'fix-it' model, describing the  
43 patient's disease as an isolated abnormality linked directly with a surgical solution [30].

44  
45  
46  
47  
48  
49  
50  
51  
52  
53  
54 Of the literature on shared decision making for surgery, only a small number of North  
55 American studies focus on high-risk patients [31-34]. Two have focussed on how surgeons  
56 and patients discuss options in the event that post-operative complications are severe or life  
57 threatening. Analysis of audio-recorded shared decision making encounters for high-risk  
58  
59  
60

1  
2  
3 surgery identified significant communication gaps regarding potentially severe post-operative  
4 complications [31, 33]. Follow up interviews revealed assumptions (on the part of patients  
5 and clinicians) that surgeons shared patients' values and expectations and would advise them  
6 accordingly, and that surgeons often regarded decisions about surgery as needing to be  
7 guided by their expertise and experience, over individual and preference-sensitive choice.  
8  
9

10  
11  
12 One study underscored the challenge for patients of incorporating their values and beliefs  
13 into shared decision making for high-risk surgery [32]. Most patients agreed that surgery  
14 should only be considered when it could improve quality of life. However, when faced with a  
15 decision in a life-saving surgery scenario the majority chose surgery with likely subsequent  
16 functional impairment over palliation, citing lack of belief in the surgeons prognosis ('there  
17 must be a better outcome available') and a feeling that 'choosing death' was unacceptable.  
18 Surgeons discussed the challenge of 'surgical momentum', ie, once a patient is on a pathway  
19 toward surgery the expectations of the patient and their family makes it hard to divert them  
20 away from a surgical intervention, even when they recognise the potential risk of severe post-  
21 operative complications. The language used, particularly the focus on 'fixing' a problem, was  
22 found to close down discussions about the value of surgery and how it may fit with patients'  
23 overall values and goals [35]. To our knowledge, there are no published studies focused  
24 specifically on clinicians' perceptions of decision making for high-risk surgery, and why it may  
25 (or may not) be 'shared'. Research on the information needs of patients found a mis-match  
26 between what surgeons discussed in consultations and what patients wanted to know [27].  
27 In particular, patients wanted less technical information and more discussion of long-term  
28 effects. This resonates with recent legal judgments emphasising that, "*The doctor's duty is*  
29 *not fulfilled by bombarding the patient with technical information*" [10].  
30  
31  
32  
33  
34  
35  
36  
37  
38  
39  
40  
41  
42  
43  
44  
45

46 In sum, the literature on shared decision making for surgery is in its infancy, tends to focus on  
47 information giving , and employs quantitative assessments of the outcomes of decision  
48 making over qualitative understanding of processes and experiences. Studies relevant to  
49 surgery for high-risk patients are limited in number and suggest that high-risk patients often  
50 do not realise that they have a choice about surgery and have mismatched expectations about  
51 what may happen after surgery.  
52  
53  
54  
55  
56

57 Research that enables understanding of shared decision making for high-risk patients is  
58 therefore timely and necessary. In this new study we seek to identify perspectives on, and  
59  
60

1  
2  
3 communicative features of, the shared decision making process for high-risk patients who are  
4 offered surgery asking:

- 5  
6  
7 1. How do patients, their families and clinical teams approach and negotiate decision making  
8 for major surgery?  
9  
10  
11 2. Having had (or declined) major surgery, how do patients, their families and clinical teams  
12 reflect on the decisions they made?  
13  
14  
15  
16  
17

## 18 METHODS AND ANALYSIS

### 19 Origins, design and governance of the study

20  
21  
22 The study forms part of a six-year programme of work, *Optimising Shared decision-making*  
23 *for high Risk Surgery* (OSIRIS, <https://osiris-programme.org/>) funded by the National Institute  
24 for Health Research in England. OSIRIS comprises four interlinked projects leading to the  
25 development and testing of a decision support intervention, to improve shared decision  
26 making about elective major surgery between doctors and patients at high-risk of adverse  
27 long-term outcomes. The OSIRIS programme has significant governance oversight including a  
28 management group (see supplementary file), a shadow steering committee, with patient and  
29 public membership and a lay chair, which meets six-monthly and feeds into the main  
30 programme steering committee. An OSIRIS collaborators group includes stakeholders from  
31 NHS, professional bodies, academia, policy and patients.  
32  
33  
34  
35  
36  
37  
38  
39  
40  
41  
42

43  
44 In this study we use qualitative methods to explore in-depth how patients, their families and  
45 clinicians negotiate decision making and reflect back on the decisions they made. The study  
46 involves a multidisciplinary team with representation from medicine/nursing, sociology,  
47 social policy and bioethics. Phase 1 involves video-recording decision making encounters  
48 about major surgery, between patients, their carers/families and clinicians to understand the  
49 content and flow of decision making about surgery; followed by interviews (immediately after  
50 and 3-6 months later). Phase 2 involves focus groups with a wider group of patients and  
51 clinicians to test out emerging findings.  
52  
53  
54  
55  
56  
57  
58  
59  
60

## Theoretical and conceptual framework

Our research is framed by practice theory, recognising that decisions about surgery are distributed over time and space (ie, they rarely occur at single 'decision points') [36], involve varied stages of (potentially collaborative) deliberation [37], and are shaped by interaction with a range of actors and artefacts [38]. This guided us to focus on decision-making-in-action, seeing the process of decision making and the activities and events allied to it (eg, consultations, clinics, letters, family discussions), as something that happens through an on-going process of communication and collaborative articulation of what major surgery might mean for those involved. We draw on ethnography of communication (an approach that aims to produce systematic and richly contextualised descriptions of communicative genres, events and practices [39]) to understand how meanings about surgery are constructed, the influence of moral and ethical dimensions and how communication and interaction unfold.

Finally, given that healthcare is heavily institutionalised, and behaviour often ritualised (ie, we know, and play out, the roles expected of us as clinicians, patients and so on), we draw on the notion of 'organisational routines' [40], defined as 'recognizable, repetitive patterns of interdependent action carried out by multiple actors' [41]. Routines are how organisational life is patterned, hence studying these can provide key insights into how shared decision making may (or may not) be integrated in to the three surgical areas of interest.

## Sampling and data collection

### Surgical areas

The OSIRIS programme focuses on three different (elective) surgical procedures: major joint, intra-abdominal and cardiac surgery. We plan to examine how the context of the differing conditions influences the decisions that patients and doctors make, how these decisions are made in the light of different ways of organising treatments and resources, and the multiple points at which patients and clinicians come together to consider and make decisions about surgery.

Major joint replacement for osteoarthritis is a symptomatic treatment which will not prolong life but can improve quality of life for those with significant pain and reduced mobility. It is

likely to be considered and discussed within primary care, as well as specialist musculoskeletal services, as part of a potentially long-term process of considering surgery with an orthopaedic team. Colorectal surgery for bowel cancer is essential and requires relatively rapid decisions about treatment. Following diagnosis patients, relatives and clinicians are faced with choices about the nature of the procedure (including a potential for palliative surgery) and the need for adjunct radio- or chemotherapy. Coronary artery bypass grafting may prolong life at a population level, but for the individual patient this benefit is not guaranteed, especially for frailer or multi-morbid patients. Increasingly, less invasive, percutaneous coronary interventions have created a range of options for patients with ischaemic heart disease. There are however a range of short and long term risks associated with both choices (eg, percutaneous options offer fewer short term risks to patients but have inferior long term outcomes compared to surgery for more severe ischaemic heart disease).

Preliminary work with clinicians to map out the decision making processes across conditions/sites (Figures 1-3) has highlighted variation in how services are organised (eg, variation in the anaesthetic pre-operative assessment offered) and the distributed nature of decision making (ie, taking place over time, in multiple settings, involving multiple discussions with, potentially, many people [36, 37]). This means that the process of decision making about elective surgery is likely to be different across the three surgical specialties of interest (see Figures 1-3) and across settings. Our focus on high-risk patients due to age, chronic comorbidity, or frailty means that decision making is also likely to be influenced by past experiences (eg, prior surgery) and have a more complex combination of long-term outcomes to consider.

FIGURES 1-3 ABOUT HERE

### **Phase 1 –video-recording of decision making encounters, plus follow-up interviews**

In phase 1 we will purposively select three NHS hospitals that are undertaking at least two of the three surgical procedures of interest. Working with clinical teams (who will receive basic study information) we will recruit a maximum variation, purposive-sample of 15 high-risk patients aged  $\geq 60$  years (to capture a range of high-risk patients, not simply those who are

1  
2  
3 older) with an age-adjusted Charlson co-morbidity score [42] of  $\geq 4$ , who are contemplating  
4 elective surgery (anticipating five from each surgical group including, where feasible, one  
5 patient who has declined surgery), with adequate variation in age, gender and social  
6 circumstances and including travel time to the hospital.  
7  
8  
9

10  
11 We will video-record up to 15 consultations that involve decision making about major surgery  
12 for those who agree to participate, seeking to capture verbal and non-verbal interaction, and  
13 enabling detailed insight into the decision making process in terms of the content of  
14 consultations (eg, information exchanged) and the interaction (eg, between clinician and  
15 patient). This will involve the researcher placing one or two video cameras in the consultation  
16 room and recording the consultation. Where the patient agrees, the researcher will remain  
17 in the room. This is usual in qualitative studies, with the researcher's presence enabling  
18 appreciation of each consultation as it unfolds in real time and the video recording facilitating  
19 detailed analysis of interaction that is not feasible through observation alone).  
20  
21  
22  
23  
24  
25  
26

27  
28 Pathways for major surgery vary (Figures 1-3). We will not know how decision making  
29 processes unfold – and hence exactly which consultation we will record - until we have gained  
30 access to each site and clinical team. For some participants the consultation that we record  
31 will be with their surgeon and will follow a series of contacts with the health service. For  
32 others, the consultation we record may be with another member of the clinical team (eg,  
33 anaesthetist) who has had a critical role in the decision-making process. Where decision  
34 making clearly spans several encounters we will endeavour to record (or at the very least  
35 observe) more than one consultation.  
36  
37  
38  
39  
40  
41  
42

43 We will subsequently conduct narrative interviews with patients and clinicians (and carers  
44 where relevant) at two points (Table 1): as soon as practically possible after their consultation,  
45 and 3-6 months later. We will adopt a narrative approach [43], encouraging interviewees to  
46 recount the details of their experiences (eg, their condition, decision making about surgery).  
47 Interviews will last up to one hour, be face-to-face (wherever possible, by phone when not)  
48 and be audio-recorded. Reimbursement will be offered for basic expenses (e.g. car parking)  
49 incurred.  
50  
51  
52  
53  
54  
55

56 Interview data will enable a detailed understanding of the relevant condition, how it has  
57 unfolded, experiences of decision making and the context within which decisions were made,  
58  
59  
60



1  
2  
3 and thoughts and expectations about surgery (if this is the option chosen); as well as  
4 experiences since having or declining surgery, and reflections back on the decision made.  
5  
6  
7  
8  
9

10 TABLE 1 ABOUT HERE  
11  
12  
13

## 14 **Phase 2 – focus groups**

15  
16 Focus groups will allow us to test out emerging findings with a broader group of participants.  
17 We will purposively select up to 3 NHS hospitals (at least one of which will be different from  
18 phase 1) undertaking major joint surgery, intra-abdominal surgery and cardiac surgery, using  
19 the same criteria as phase 1. We will recruit a purposive maximum variation sample of up to  
20 90 high-risk patients (up to 9 focus groups), excluding any patients recruited in phase 1, who  
21 have undergone or declined surgery in one of these areas in the past 12 months and ensuring  
22 a mix of age, gender, social circumstances and surgical outcomes. Where patients with severe  
23 complications are unable to participate, we will invite them to nominate someone who can  
24 represent their views and/or have a carer attend with them.  
25  
26  
27  
28  
29  
30  
31  
32

33 Working with Royal Colleges, we will also recruit a purposive sample of up to 30 surgeons,  
34 doctors, anaesthetists and clinical nurse specialists (up to 3 focus groups) caring for patients  
35 having these types of surgery, ensuring a mix of age, gender, clinical position and experience,  
36 role and location. We will hold at least one focus group involving a mix of professional groups.  
37  
38  
39  
40

41 Focus groups with patients and carers will be held at or close by (eg, local community centre)  
42 to participating sites, involve 8-10 participants in each. Those involving clinicians will be held  
43 at central locations (eg, one of the Royal Colleges). The same topic guide will be used across  
44 groups, guiding participants to introduce themselves and say what their experience is of  
45 making decisions (or supporting others) about major surgery. We plan to ask patients, carers  
46 and clinicians to share thoughts on the draft scenarios (i.e. 3-5 summary descriptions of  
47 decision making) developed from phase 1,. Focus groups will be audio-recorded and  
48 transcribed.  
49  
50  
51  
52  
53  
54  
55  
56  
57  
58  
59  
60

## Analysis and synthesis

Table 1 summarises different data sources and how these will be analysed and synthesised to provide detailed decision making scenarios and inform the wider OSIRIS programme.

In phase 1 we will develop summaries for each case (ie, patient, family/carers and clinicians), detailing how their condition developed and led them to access services, the process of gaining a diagnosis and discussing possible surgery, the exchange of information about surgery (including relevant national and international guidelines) and expectations allied to that, reflections on risk, the involvement of others in decision making about surgery, the experience of surgery and post-operative care or of living with the condition having declined surgery; as well as post-hoc reflections on decision making in light of outcomes following surgery or the decision to decline.

We will supplement this with detailed analysis of decision making encounters. Video-recordings provide a powerful dataset for analysis, allowing us to zoom in and slow down the decision making process to examine interactions, judgements and interpretations [44], the bodily conduct of participants, and the ways in which objects (eg, consent forms) come to gain significance at particular moments [45]. Recordings will be transcribed (eg, using ELAN, a specialist programme used by linguists) to allow us to capture granular (verbal and non-verbal) detail of interaction, repeatedly view and tag data digitally (ensuring immersion in the full video and audio at the level of a sentence, comment or other linguistic feature, which is often key to analysis [45]), and produce a textual transcript meaning that we can engage indirectly with the data via transcripts of each decision making encounter.

We will then examine video data in depth to: identify key features of shared decision making encounters, examine the way 'communicative competence' [46] shapes shared decision making (ie, how participants deploy their tacit understanding of a particular communicative event, and competencies needed to maximise the benefits of the encounter), and attend to the contextual factors (eg, presence of carers, preceding exchange of information) that shape decision making. Analysis of interaction will be informed by ethnography of communication (see above) and guided by established techniques developed for the micro-analysis of face-to-face interaction. The issues that are likely to repay close analysis include: openings (how participants initially frame the consultation); the use of questions (eg, whether and how

1  
2  
3 patients as well as clinicians use them) and, the expression of affect (particularly when  
4 clinicians need to communicate complicated or sensitive information).  
5  
6

7 We will synthesize data from phase 1 into vignettes, drawing on video-recordings to  
8 understand communication and interaction, and on interviews and field notes to understand  
9 the clinical, organisational, material and cultural context in which shared decision making  
10 takes place. Guided by existing theory (see above) we will compare and contrast across  
11 vignettes to examine similarities and differences in decision making, paying particular  
12 attention to the ways in which participants seek to achieve constructive interpersonal  
13 engagement, recognition of alternative actions, comparative learning, preference  
14 construction and elicitation, and preference integration (ie, the key components of  
15 Collaborative Deliberation [37]). Finally we will develop 3-5 draft decision making scenarios,  
16 emerging from identification of patterns in our emerging analysis about how decision making  
17 variably unfolds amongst different groups, in different settings and for different kinds of  
18 surgery; as well as the extent to which this might be regarded as 'shared'.  
19  
20  
21  
22  
23  
24  
25  
26  
27  
28  
29

30 We will use thematic and comparative analysis [47] to analyse focus group data, generating a  
31 detailed understanding of the choices that patients, families/carers and clinicians make about  
32 surgery, and the factors that shape decision making. We will revise decision making scenarios  
33 in light of wider consensus (or challenge) about the importance placed on short- medium-  
34 and long term outcomes after different types of surgery (or no surgery). Finally we will  
35 synthesise analyses across our datasets, seeking to extend current theory on decision making  
36 for high-risk patients offered surgery (Table 1).  
37  
38  
39  
40  
41  
42  
43  
44  
45  
46  
47  
48

## 49 **Patient and public involvement**

50 We are committed to patient and public involvement in all stages of the research. Patients  
51 with lived experience of major surgery are included in the OSIRIS programme leadership and  
52 steering committee. A patient panel has already been established, providing patients with the  
53 space to discuss the research, and feed directly into the main steering committee. Patients  
54 will be invited to participate in workshops early in the programme to refine our research  
55 design, guide the team on how best to approach sensitive topics with patients, and help to  
56 refine research tools (eg, topic guides). Later in the OSIRIS programme these patient networks  
57  
58  
59  
60

1  
2  
3 will help to co-design a decision support intervention. Patient co-applicants will act as co-  
4 authors for scientific and lay reports.  
5  
6  
7  
8

## 9 10 ETHICS AND DISSEMINATION 11

12  
13 The research has received ethical approval from South Central Oxford C Research Ethics  
14 Committee (19/SC/0043). At the time of writing we have recruited all three sites and gained  
15 local governance approval.  
16  
17

18  
19 An important ethical issue relates to the involvement of patients (and by extension  
20 family/carers) at a time when they might be feeling emotionally and physically vulnerable and  
21 needing to make potentially life-changing decisions. We have sought to address this by  
22 ensuring that recruitment/consent is as straightforward as possible, framing questions about  
23 care and experiences of surgery sensitively, and inviting patients (should they wish) to involve  
24 family members or other carers in interviews. Working closely with clinical teams, we will be  
25 sensitive to the different clinical pathways and the ways in which information and diagnoses  
26 are shared with patients, and have planned an observation period with each site in phase 1  
27 to appreciate the referral and decision making process about major surgery before recruiting  
28 patients.  
29  
30

31  
32 We plan dissemination within and outside of the OSIRIS programme (Table 2). For the former  
33 we will produce a typology of decision making scenarios for major surgery. Combined with  
34 research to determine what happens to patients during the years after surgery, this will  
35 inform the co-design of a decision support intervention to be tested in a clinical trial. For the  
36 latter, we will produce research publications and presentations for academics, including a  
37 refined theory of shared decision making relevant to high-risk patients in the context of  
38 surgery. For service providers, policymakers and regulators, we propose succinct and  
39 accessible summaries of key findings including summaries of decision making scenarios and  
40 provisional operational guidance. For patients and families/carers, we will produce a leaflet  
41 and web download summarising findings and setting out what to expect when making a  
42 decision about major surgery.  
43  
44  
45  
46  
47  
48  
49  
50  
51  
52  
53  
54  
55  
56  
57  
58  
59  
60

1  
2  
3 TABLE 2 ABOUT HERE  
4  
5  
6  
7

8 Availability of video data holds potential for further research and training about shared  
9 decision making (Table 2). In future we plan to work with colleagues in the OSIRIS programme  
10 and more widely to provide rich and detailed accounts of shared decision making in practice,  
11 and inform practice.  
12  
13  
14  
15  
16  
17  
18  
19  
20  
21  
22  
23  
24  
25  
26  
27  
28  
29  
30  
31  
32  
33  
34  
35  
36  
37  
38  
39  
40  
41  
42  
43  
44  
45  
46  
47  
48  
49  
50  
51  
52  
53  
54  
55  
56  
57  
58  
59  
60

For peer review only

## Author contributions:

SS conceptualised the study and wrote the first draft of the paper. GH and TS contributed to study design and will be collecting and analysing data across the study. JD, JE, EA and ME have contributed to understanding surgical pathways, developing decision making maps (Figures 1-3) and approaches to recruitment into the study. RA has contributed to theoretical approach, particularly on decision making. RP and JP are co-directors of the OSIRIS programme, of which this study is part and which the OSIRIS Programme Group oversees. LE is lay chair of the OSIRIS shadow steering group. Both the OSIRIS Programme Group and shadow steering group have fed into the design and conduct of the study. All authors had input to revisions of the paper and approved the final manuscript.

## Funding statement:

The OSIRIS Programme is supported by the National Institute of Health Research [grant number RP-PG-0218-20001]. SS is also supported via the National Institute for Health Research Biomedical Research Centre, Oxford [grant number BRC-1215-20008] to the Oxford University Hospitals NHS Foundation Trust and the University of Oxford. The views expressed are those of the author(s) and not necessarily those of the NIHR or the Department of Health and Social Care.

## Competing interests statement:

We have read and understood the BMJ Group policy on declaration of interests and declare the following interests: SES, GH, TS, JP, EA, JD, ME, JE, LE declare no interests. RP has received research grants and/or honoraria from Edwards Lifesciences, Intersurgical, BBraun and GlaxoSmithkline.

## REFERENCES

1. Katz J: **The silent world of doctor and patient**. Baltimore, MD: John Hopkins University Press; 1984.
2. Charles C, Gafni A, Whelan T: **Decision-making in the physician–patient encounter: revisiting the shared treatment decision-making model**. *Social Science & Medicine* 1999, **49**(5):651-661.
3. Coulter A, Collins A: **Making shared decision making a reality: no decision about me without me**. In. London: King's Fund; 2011.
4. Sturgess J, Clapp JT, Fleisher LA: **Shared decision-making in peri-operative medicine: a narrative review**. *Anaesthesia* 2019, **74** Suppl 1:13-19.
5. Mongan D, Long J, Farragher L: **Models of Patient Advocacy: Evidence Brief**. In. Dublin: Health Research Board; 2016.
6. Epstein RM, Street RL, Jr.: **The values and value of patient-centered care**. *Annals of family medicine* 2011, **9**(2):100-103.
7. Committee on Quality of Health Care in America. Institute of Medicine: **Crossing the Quality Chasm: A New Health System for the 21st Century**. In. Washington, DC: National Academy Press; 2001.
8. Institute of Medicine: **Dying in America: Improving Quality and Honoring Individual Preferences Near the End of Life**. Washington, DC: The National Academies Press; 2015.
9. **Choosing Wisely** [<https://www.choosingwisely.org/>]
10. **Montgomery (Appellant) v Lanarkshire Health Board (Respondent) [2015] UKSC11 on appeal from [2013] CSIH 3**. In.
11. General Medical Council: **Good medical practice**. In. London: GMC; 2013, updated 2014.
12. Department of Health: **NHS Constitution: the NHS belongs to us all**. In. London: DH; 2009, updated 2015.
13. Key W, Stewart M: **Guidelines for the Provision of Anaesthesia Services**. In. London: Royal College of Anaesthetists; 2016.
14. Abbott TEF, Fowler AJ, Dobbs TD, Harrison EM, Gillies MA, Pearse RM: **Frequency of surgical treatment and related hospital procedures in the UK: a national ecological study using hospital episode statistics**. *Br J Anaesth* 2017, **119**(2):249-257.
15. Pearse RM, Moreno RP, Bauer P, Pelosi P, Metnitz P, Spies C, Vallet B, Vincent J-L, Hoefft A, Rhodes A: **Mortality after surgery in Europe: a 7 day cohort study**. *The Lancet* 2012, **380**(9847):1059-1065.
16. International Surgical Outcomes Study Group: **Global patient outcomes after elective surgery: prospective cohort study in 27 low-, middle- and high-income countries**. *British Journal of Anaesthesia* 2016, **117**(5):601-609.
17. Khuri SF, Daley J, Henderson W, Hur K, Demakis J, Aust JB, Chong V, Fabri PJ, Gibbs JO, Grover F *et al*: **The Department of Veterans Affairs' NSQIP: the first national, validated, outcome-based, risk-adjusted, and peer-controlled program for the measurement and enhancement of the quality of surgical care. National VA Surgical Quality Improvement Program**. *Annals of Surgery* 1998, **228**(4):491-507.
18. Doherty C, Saunders MNK: **Elective surgical patients' narratives of hospitalization: The co-construction of safety**. *Social Science & Medicine* 2013, **98**:29-36.
19. Bougeard A-M, Brent A, Swart M, Snowden C: **A survey of UK peri-operative medicine: pre-operative care**. *Anaesthesia* 2017, **72**(8):1010-1015.
20. de Mik SML, Stubenruch FE, Balm R, Ubbink DT: **Systematic review of shared decision-making in surgery**. *BJS* 2018, **105**(13):1721-1730.

- 1
  - 2
  - 3
  - 4
  - 5
  - 6
  - 7
  - 8
  - 9
  - 10
  - 11
  - 12
  - 13
  - 14
  - 15
  - 16
  - 17
  - 18
  - 19
  - 20
  - 21
  - 22
  - 23
  - 24
  - 25
  - 26
  - 27
  - 28
  - 29
  - 30
  - 31
  - 32
  - 33
  - 34
  - 35
  - 36
  - 37
  - 38
  - 39
  - 40
  - 41
  - 42
  - 43
  - 44
  - 45
  - 46
  - 47
  - 48
  - 49
  - 50
  - 51
  - 52
  - 53
  - 54
  - 55
  - 56
  - 57
  - 58
  - 59
  - 60
21. Boss EF, Mehta N, Nagarajan N, Links A, Benke JR, Berger Z, Espinel A, Meier J, Lipstein EA: **Shared Decision Making and Choice for Elective Surgical Care:A Systematic Review.** *Otolaryngology–Head and Neck Surgery* 2016, **154**(3):405-420.
22. Joseph-Williams N, Elwyn G, Edwards A: **Knowledge is not power for patients: A systematic review and thematic synthesis of patient-reported barriers and facilitators to shared decision making.** *Patient Education and Counseling* 2014, **94**(3):291-309.
23. Clapp JT, Arriaga AF, Murthy S, Raper SE, Schwartz JS, Barg FK, Fleisher LA: **Surgical Consultation as Social Process: Implications for Shared Decision Making.** *Ann Surg* 2019, **269**(3):446-452.
24. Scholl I, LaRussa A, Hahlweg P, Kobrin S, Elwyn G: **Organizational- and system-level characteristics that influence implementation of shared decision-making and strategies to address them - a scoping review.** *Implement Sci* 2018, **13**(1):40.
25. Müller E, Hahlweg P, Scholl I: **What do stakeholders need to implement shared decision making in routine cancer care? A qualitative needs assessment.** *Acta Oncologica* 2016, **55**(12):1484-1491.
26. King E, Taylor J, Williams R, Vanson: **The MAGIC programme: evaluation. An independent evaluation of the MAGIC (Making good decisions in collaboration) improvement programme.** In. London: Health Foundation; 2013.
27. McNair AGK, MacKichan F, Donovan JL, Brookes ST, Avery KNL, Griffin SM, Crosby T, Blazeby JM: **What surgeons tell patients and what patients want to know before major cancer surgery: a qualitative study.** *BMC Cancer* 2016, **16**:258.
28. Braddock CI, Hudak PL, Feldman JJ, Bereknyei S, Frankel RM, Levinson W: **“Surgery Is Certainly One Good Option”: Quality and Time-Efficiency of Informed Decision-Making in Surgery.** *JBJS* 2008, **90**(9):1830-1838.
29. Kruser JM, Pecanac KE, Brasel KJ, Cooper Z, Steffens N, McKneally M, Schwarze ML: **“And I think that we can fix it”: Mental Models used in High-Risk Surgical Decision Making.** *Annals of surgery* 2015, **261**(4):678-684.
30. Taylor LJ, Rathouz PJ, Berlin A, Brasel KJ, Mosenthal AC, Finlayson E, Cooper Z, Steffens NM, Jacobson N, Buffington A *et al*: **Navigating high-risk surgery: protocol for a multisite, stepped wedge, cluster-randomised trial of a question prompt list intervention to empower older adults to ask questions that inform treatment decisions.** *BMJ Open* 2017, **7**(5).
31. Pecanac KE, Kehler JM, Brasel KJ, Cooper Z, Steffens NM, McKneally MF, Schwarze ML: **It's big surgery: preoperative expressions of risk, responsibility, and commitment to treatment after high-risk operations.** *Ann Surg* 2014, **259**(3):458-463.
32. Nabozny MJ, Kruser JM, Steffens NM, Brasel KJ, Campbell TC, Gaines ME, Schwarze ML: **Constructing High-stakes Surgical Decisions: It's Better to Die Trying.** *Ann Surg* 2016, **263**(1):64-70.
33. Nabozny MJ, Kruser JM, Steffens NM, Pecanac KE, Brasel KJ, Chittenden EH, Cooper Z, McKneally MF, Schwarze ML: **Patient-reported Limitations to Surgical Buy-in: A Qualitative Study of Patients Facing High-risk Surgery.** *Ann Surg* 2017, **265**(1):97-102.
34. Steffens NM, Tucholka JL, Nabozny MJ, Schmick AE, Brasel KJ, Schwarze ML: **Engaging patients, health care professionals, and community members to improve preoperative decision making for older adults facing high-risk surgery.** *JAMA Surgery* 2016, **151**(10):938-945.
35. Fovargue S, Miola J: **One step forward, two steps back? The GMC, the common law and ‘informed’ consent.** *Journal of Medical Ethics* 2010, **36**(8):494-497.
36. Rapley T: **Distributed decision making: the anatomy of decisions-in-action.** *Sociol Health Illn* 2008, **30**(3):429-444.



- 1  
2  
3 37. Elwyn G, Lloyd A, May C, van der Weijden T, Stiggelbout A, Edwards A, Frosch DL, Rapley T,  
4 Barr P, Walsh T *et al*: **Collaborative deliberation: a model for patient care**. *Patient Educ*  
5 *Couns* 2014, **97**(2):158-164.  
6 38. Feldman MS, Orlikowski WJ: **Theorizing Practice and Practicing Theory**. *Organization Science*  
7 2011, **22**(5):1240-1253.  
8 39. Gumperz J, Hymes D: **Directions in Sociolinguistics: The Ethnography of Communication**.  
9 New York: Basil Blackwell; 1972.  
10 40. Feldman MS, Pentland BT: **Reconceptualizing Organizational Routines as a Source of**  
11 **Flexibility and Change**. *Administrative Science Quarterly* 2003, **48**(1):94-118.  
12 41. Feldman MS, Pentland BT, D'Adderio L, Lazaric N: **Beyond Routines as Things: Introduction**  
13 **to the Special Issue on Routine Dynamics**. *Organization Science* 2016, **27**(3):505-513.  
14 42. Charlson M, Szatrowski TP, Peterson J, Gold J: **Validation of a combined comorbidity index**.  
15 *Journal of Clinical Epidemiology* 1994, **47**:1245-1251.  
16 43. Greenhalgh T, Russell J, Swinglehurst D: **Narrative methods in quality improvement**  
17 **research**. *Quality and Safety in Health Care* 2005, **14**(6):443.  
18 44. Bezemer J, Cope A, Korikiakangas T, Kress G, Murtagh G, Weldon SM, Kneebone R:  
19 **Microanalysis of video from the operating room: an underused approach to patient safety**  
20 **research**. *BMJ Qual Saf* 2017, **26**(7):583-587.  
21 45. Pearce C: **Doctors, Patients and Computers, the New Consultation (PhD thesis)**. .  
22 Melbourne, Australia: Department of General Practice, The University of Melbourne; 2007.  
23 46. Hymes D: **On communicative competence**. In: *Sociolinguistics: Selected Readings*. edn.  
24 Edited by Pride JB, Holmes J. Harmondsworth: Penguin; 1972: 269-293.  
25 47. Miles M, Huberman M, Saldana J: **Qualitative Data Analysis: A Methods Sourcebook**.  
26 London: Sage; 2014.  
27  
28  
29  
30  
31  
32  
33  
34  
35  
36  
37  
38  
39  
40  
41  
42  
43  
44  
45  
46  
47  
48  
49  
50  
51  
52  
53  
54  
55  
56  
57  
58  
59  
60

**Table 1: Overview of data structure and planned analysis**

| Data source                                                                     | Data collected                                                                                                                                                                                                                                                                                                      | First order interpretations                                                                                                                                                                                                                                                                                                         | Higher-order interpretations                                                                                                                                                                                                                                                                                                                                                                                                                                                                                                  |
|---------------------------------------------------------------------------------|---------------------------------------------------------------------------------------------------------------------------------------------------------------------------------------------------------------------------------------------------------------------------------------------------------------------|-------------------------------------------------------------------------------------------------------------------------------------------------------------------------------------------------------------------------------------------------------------------------------------------------------------------------------------|-------------------------------------------------------------------------------------------------------------------------------------------------------------------------------------------------------------------------------------------------------------------------------------------------------------------------------------------------------------------------------------------------------------------------------------------------------------------------------------------------------------------------------|
| Case studies of decision making for surgery (Jun-19 to Feb-20)                  | <ul style="list-style-type: none"> <li>Video-recordings of 15 consultations across three different surgical areas</li> <li>Researcher field notes, including clinical pathways</li> </ul>                                                                                                                           | <ul style="list-style-type: none"> <li>Key exchanges shaping decision making about surgery between clinicians, patients (and potentially carers/family members)</li> <li>Unfolding interaction, and use of decision making aids/tools</li> <li>Clinic workflows, 'decision points' for surgery and key interdependencies</li> </ul> | <ul style="list-style-type: none"> <li>How patients, clinicians and carers relate; and how/when they come together to discuss – and make decisions about – surgery</li> <li>'Scripts' held by patients/clinicians about how they should behave and interact</li> <li>When a meaningful decision about surgery is made, by whom and how</li> <li>Organisational and clinic context to decision making</li> </ul>                                                                                                               |
| Pre-operative narratives about decision making about surgery (Sep-19 to Feb-20) | Follow-up interviews (up to 45) with <ul style="list-style-type: none"> <li>the same 15 consulting patients and their clinicians and, where relevant, carer/family member</li> <li>other members of the clinical team (eg, anaesthetists, specialist nurses) involved in shaping decisions about surgery</li> </ul> | <ul style="list-style-type: none"> <li>Reflections on decisions made about surgery</li> <li>Perceptions on the decision making process over time, including strategies for communication and sharing information</li> <li>Experiences of decision making, and expectations going forward</li> </ul>                                 | <ul style="list-style-type: none"> <li>Internal social structures (what actors 'know', how they understand and interpret about surgery, including what 'a decision' about surgery means to actors</li> <li>'Scripts' held about decision making and how they change over time, including assumptions about:               <ul style="list-style-type: none"> <li>capability of users</li> <li>how people interact</li> <li>consent</li> <li>clinical work and routines</li> <li>how these all interact</li> </ul> </li> </ul> |
| Post-hoc reflections on decision making about surgery (Dec-19 to Jun-20)        | <ul style="list-style-type: none"> <li>Follow-up interviews (up to 45) with the same 15 consulting patients and their clinicians and, where relevant, carer/family member</li> <li>Focus group interviews with (up to 90) patients/carers and (up to 30) clinicians</li> </ul>                                      | <ul style="list-style-type: none"> <li>Key organisational and clinic strategies, and how these change over time</li> <li>How participants felt</li> </ul>                                                                                                                                                                           |                                                                                                                                                                                                                                                                                                                                                                                                                                                                                                                               |

1  
2  
3  
4  
5  
6  
7  
8  
9  
10  
11  
12  
13  
14  
15  
16  
17  
18  
19  
20  
21  
22  
23  
24  
25  
26  
27  
28  
29  
30  
31  
32  
33  
34  
35  
36  
37  
38  
39  
40  
41  
42  
43  
44  
45  
46

For peer review only

Table 2: Anticipated outputs and impact

|                                                                     | <b>Planned outputs</b>                                                                                                                                                                                                                                                                                       | <b>Anticipated impact</b>                                                                                                                                                                                                                                                                                                                                             |
|---------------------------------------------------------------------|--------------------------------------------------------------------------------------------------------------------------------------------------------------------------------------------------------------------------------------------------------------------------------------------------------------|-----------------------------------------------------------------------------------------------------------------------------------------------------------------------------------------------------------------------------------------------------------------------------------------------------------------------------------------------------------------------|
| <b>Phase 1</b><br>Video recording of consultations, plus interviews | 15 detailed vignettes of decision making for high risk surgery<br><br>3-5 draft decision making scenarios, summarising patient pathways and decision making                                                                                                                                                  | Increased understanding (within and beyond OSIRIS) of the process of decision making.<br><br>Identification of the long-term outcomes that matter most to patients contemplating major surgery                                                                                                                                                                        |
| <b>Phase 2</b><br>Focus groups with patients, carers and clinicians | Typology of decision making scenarios<br><br>Exemplar vignettes and videos (with consent) providing insights into decision making for high risk surgery<br><br>Research publications and presentations, plus accessible summaries of key findings<br><br>Leaflet and web download for patients and families. | Inform co-design, with patients and doctors, of a decision support intervention to be tested in a clinical trial<br><br>Refined theory of shared decision making relevant to high-risk surgical patients<br><br>Improved guidance for clinicians, patients and providers<br><br>Increased understanding of what to expect when making a decision about major surgery. |

Figure 1 - Example decision-making map for orthopaedic surgery



Figure 1: Example decision-making map for orthopaedic surgery

90x129mm (300 x 300 DPI)

Figure 2 – Example decision-making map for colorectal surgery



Figure 2: Example decision-making map for colorectal surgery

190x275mm (300 x 300 DPI)

Figure 3 – Example decision-making map for cardiac surgery



Figure 3: Example decision-making map for cardiac surgery

190x275mm (300 x 300 DPI)

# OSIRIS

## Programme group list

3<sup>rd</sup> February 2020





Important note: 'bartshealth.nhs.uk' are liable to change to 'nhs.net' email addresses in the near future. Update these when possible, as peoples emails might change.

**Programme Directors:**

| First Name | Last name | Role in OSIRIS        | Contact details     | Background/Affiliations                                                                                     |
|------------|-----------|-----------------------|---------------------|-------------------------------------------------------------------------------------------------------------|
| Rupert     | Pearse    | Programme Director    | r.pearse@qmul.ac.uk | Professor and consultant in Intensive Care Medicine - Queen Mary University London / Barts Health NHS Trust |
| John       | Prowle    | Programme Co-director | j.prowle@qmul.ac.uk | Senior Clinical Lecturer in Intensive Care Medicine - Queen Mary University London / Barts Health NHS Trust |

**Management group:**

| First Name | Last name  | Role in OSIRIS             | Contact details                | Background/Affiliations                                                                                                                 |
|------------|------------|----------------------------|--------------------------------|-----------------------------------------------------------------------------------------------------------------------------------------|
| Rupert     | Pearse     | Programme Director         | r.pearse@qmul.ac.uk            | Professor and consultant in Intensive Care Medicine - Queen Mary University London / Barts Health NHS Trust                             |
| John       | Prowle     | Programme Co-director      | j.prowle@qmul.ac.uk            | Senior Clinical Lecturer in Intensive Care Medicine - Queen Mary University London / Barts Health NHS Trust                             |
| Tim        | Stephens   | Investigator               | t.t.stephens@qmul.ac.uk        | Nurse Researcher with special interest critical care and perioperative medicine - Queen Mary University London / Barts Health NHS Trust |
| Alex       | Fowler     | Investigator               | a.fowler@qmul.ac.uk            | Research Fellow with special interest in data analysis and systematic reviews - Queen Mary University London / Barts Health NHS Trust   |
| Ruzena     | Uddin      | Senior trials co-ordinator | ruzena.uddin@qmul.ac.uk        | Senior Trial Co-ordinator - Queen Mary University London                                                                                |
| Bethan     | O'Connor   | Trials co-ordinator        | b.griffiths@qmul.ac.uk         | Trial Co-ordinator - Queen Mary University London                                                                                       |
| Mari-Liis  | Pakats     | Research co-ordinator      | m.pakats@qmul.ac.uk            | Senior Trial Co-ordinator - Queen Mary University London                                                                                |
| Alastair   | Somerville | Trials co-ordinator        | alastair.somerville@qmul.ac.uk | Trial Co-ordinator - Queen Mary University London                                                                                       |

**Project 1: Phase 1: Interviews and video recordings of shared decision making encounters between doctors and patients considering major surgery, & Phase 2: Qualitative focus group discussions with patients and doctors after surgery:**

| First Name | Last name      | Role in OSIRIS             | Contact details                       | Background/Affiliations                                                                                                                 |
|------------|----------------|----------------------------|---------------------------------------|-----------------------------------------------------------------------------------------------------------------------------------------|
| Rupert     | Pearse         | Programme Director         | r.pearse@qmul.ac.uk                   | Professor and consultant in Intensive Care Medicine - Queen Mary University London / Barts Health NHS Trust                             |
| John       | Prowle         | Programme Co-director      | j.prowle@qmul.ac.uk                   | Senior Clinical Lecturer in Intensive Care Medicine - Queen Mary University London / Barts Health NHS Trust                             |
| Sara       | Shaw           | Project Chief Investigator | sara.shaw@phc.ox.ac.uk                | Professor of Health & Social Policy with a background in sociology - Oxford University                                                  |
| Tim        | Stephens       | Investigator               | t.t.stephens@qmul.ac.uk               | Nurse Researcher with special interest critical care and perioperative medicine - Queen Mary University London / Barts Health NHS Trust |
| Gemma      | Hughes         | Investigator               | gemma.hughes@phc.ox.ac.uk             | Health services researcher with a background in sociology and NHS management - Oxford University                                        |
| Charlotte  | Thompson-Grant | Administrator              | charlotte.thompson-grant@phc.ox.ac.uk | Personal Assistant and administrator - Oxford University                                                                                |

|          |           |                                       |                                   |                                                                                                             |
|----------|-----------|---------------------------------------|-----------------------------------|-------------------------------------------------------------------------------------------------------------|
| James    | Day       | Local Investigator                    | James.Day@ouh.nhs.uk              | Consultant anaesthetist and intensive care specialist - <i>Oxford University Hospital</i>                   |
| Jennifer | Edwards   | Local Investigator                    | j.edwards10@nhs.net               | Consultant anaesthetist - <i>Royal Alexandra Hospital</i>                                                   |
| Mark     | Edsel     | Local Investigator (until 20/06/2019) | Mark.Edsell@stgeorges.nhs.uk      | Consultant anaesthetist with a special interest in cardiothoracic anaesthesia - <i>St George's Hospital</i> |
| Ester    | Avagliano | Local Investigator (from 11/07/2019)  | Esther.Avagliano@stgeorges.nhs.uk | Consultant anaesthetist with a special interest in cardiothoracic anaesthesia - <i>St George's Hospital</i> |
| Joseph   | Wherton   | Senior Co-Investigator                | joseph.wherton@phc.ox.ac.uk       | Senior researcher with a background in psychology and human-computer interaction - <i>Oxford University</i> |
| Andrew   | Wragg     | Consultant Cardiologist               | Andrew.wragg2@nhs.net             | Honorary Senior Lecturer in Cardiology and Consultant Cardiologist - <i>Barts Health</i>                    |

### **Project 1.3: Comparison of patient and doctor decision making frameworks**

| First Name | Last name  | Role in OSIRIS             | Contact details                      | Background/Affiliations                                                                                                                        |
|------------|------------|----------------------------|--------------------------------------|------------------------------------------------------------------------------------------------------------------------------------------------|
| Rupert     | Pearse     | Programme Director         | r.pearse@qmul.ac.uk                  | Professor and consultant in Intensive Care Medicine - <i>Queen Mary University London / Barts Health NHS Trust</i>                             |
| John       | Prowle     | Programme Co-director      | j.prowle@qmul.ac.uk                  | Senior Clinical Lecturer in Intensive Care Medicine - <i>Queen Mary University London / Barts Health NHS Trust</i>                             |
| Magda      | Osman      | Project Chief Investigator | m.osman@qmul.ac.uk                   | Reader in Experimental Psychology with special interest in decision-making and learning - <i>Queen Mary University London</i>                  |
| Tim        | Stephens   | Investigator               | t.t.stephens@qmul.ac.uk              | Nurse Researcher with special interest critical care and perioperative medicine - <i>Queen Mary University London / Barts Health NHS Trust</i> |
| Agata      | Ludwiczak  | Post-doc researcher        | a.ryterska@qmul.ac.uk                | Post-doctoral researcher with special interest in decision making - <i>Queen Mary University London</i>                                        |
| Joseph     | Wherton    | Senior Co-Investigator     | joseph.wherton@phc.ox.ac.uk          | Senior researcher with a background in psychology and human-computer interaction - <i>Oxford University</i>                                    |
| Steven     | Millington | Clinical advisor           | Steven.Millington@bartshealth.nhs.uk | Consultant Trauma and Orthopaedic Surgeon - <i>Barts Health NHS Trust</i>                                                                      |
| Sammy      | Hanna      | Clinical advisor           | Sammy.Hanna@bartshealth.nhs.uk       | Consultant orthopaedic surgeon with a specialist interest in hip and knee disorders - <i>Barts Health NHS Trust</i>                            |
| Neil       | Roberts    | Clinical advisor           |                                      | Consultant cardiac surgeon - <i>Barts Health NHS Trust</i>                                                                                     |
| Charles    | Knowles    | Clinical advisor           | c.h.knowles@qmul.ac.uk               | Professor of Surgery, Deputy Director of Research and Director of National Bowel Research Centre - <i>Barts Health NHS Trust</i>               |

### **Project 1.4: Discrete choice surgical decision making experiments**

| First Name | Last name | Role in OSIRIS             | Contact details         | Background/Affiliations                                                                                                                        |
|------------|-----------|----------------------------|-------------------------|------------------------------------------------------------------------------------------------------------------------------------------------|
| Rupert     | Pearse    | Programme Director         | r.pearse@qmul.ac.uk     | Professor and consultant in Intensive Care Medicine - <i>Queen Mary University London / Barts Health NHS Trust</i>                             |
| John       | Prowle    | Programme Co-director      | j.prowle@qmul.ac.uk     | Senior Clinical Lecturer in Intensive Care Medicine - <i>Queen Mary University London / Barts Health NHS Trust</i>                             |
| Francesca  | Cornaglia | Project Chief Investigator | f.cornaglia@qmul.ac.uk  | Reader in Economics with a special interest in health economics - <i>Queen Mary University London</i>                                          |
| Tim        | Stephens  | Investigator               | t.t.stephens@qmul.ac.uk | Nurse Researcher with special interest critical care and perioperative medicine - <i>Queen Mary University London / Barts Health NHS Trust</i> |
| Joseph     | Wherton   | Senior Co-                 | joseph.wherton@phc.     | Senior researcher with a background in psychology                                                                                              |



|            |            |                  |                                      |                                                                                                                     |
|------------|------------|------------------|--------------------------------------|---------------------------------------------------------------------------------------------------------------------|
|            |            | Investigator     | ox.ac.uk                             | and human-computer interaction - <i>Oxford University</i>                                                           |
| Steven     | Millington | Clinical advisor | Steven.Millington@bartshealth.nhs.uk | Consultant Trauma and Orthopaedic Surgeon - <i>Barts Health NHS Trust</i>                                           |
| Sammy      | Hanna      | Clinical advisor | Sammy.Hanna@bartshealth.nhs.uk       | Consultant orthopaedic surgeon with a specialist interest in hip and knee disorders - <i>Barts Health NHS Trust</i> |
| Alessandro | Iaria      | Collaborator     | alessandro.iaria@bristol.ac.uk       | Lecturer in economics with a special interest in applied econometrics - <i>Bristol University</i>                   |
| Eugenio    | Merlano    | Collaborator     | e.f.merlanolombana@qmul.ac.uk        | PhD student in the School of Economics and Finance - <i>Queen Mary University London</i>                            |

### **Project 2.1: Long-term surgical outcomes in the UK population**

| First Name | Last name | Role in OSIRIS        | Contact details          | Background/Affiliations                                                                                                                                      |
|------------|-----------|-----------------------|--------------------------|--------------------------------------------------------------------------------------------------------------------------------------------------------------|
| Rupert     | Pearse    | Programme Director    | r.pearse@qmul.ac.uk      | Professor and consultant in Intensive Care Medicine - <i>Queen Mary University London / Barts Health NHS Trust</i>                                           |
| John       | Prowle    | Programme Co-director | j.prowle@qmul.ac.uk      | Senior Clinical Lecturer in Intensive Care Medicine - <i>Queen Mary University London / Barts Health NHS Trust</i>                                           |
| Alex       | Fowler    | Lead Investigator     | a.fowler@qmul.ac.uk      | Research Fellow with special interest in data analysis and systematic reviews - <i>Queen Mary University London / Barts Health NHS Trust</i>                 |
| David      | Cromwell  | Senior Investigator   | dcromwell@rcseng.ac.uk   | Professor of Health Services Research – <i>LSHTM/Royal College of Surgeons</i>                                                                               |
| Kambiz     | Boomla    | Senior Investigator   | k.boomla@qmul.ac.uk      | Clinical Senior Lecturer and GP, Clinical Lead in the Clinical Effectiveness Group - <i>Queen Mary University London</i>                                     |
| Michael    | Gillies   | Collaborator          | michael.gillies@ed.ac.uk | Honorary Clinical Reader, Consultant and Associate Medical Director with special interest in perioperative intensive care - <i>Royal Infirmary Edinburgh</i> |
| Ewen       | Harrison  | Collaborator          | ewen.harrison@gmail.com  | Professor of Surgery and Data Science and Honorary Consultant Surgeon - <i>University of Edinburgh</i>                                                       |

### **Project 2.2: Burden of primary and secondary care for high-risk patients before and after major**

| First Name | Last name | Role in OSIRIS        | Contact details                  | Background/Affiliations                                                                                                                      |
|------------|-----------|-----------------------|----------------------------------|----------------------------------------------------------------------------------------------------------------------------------------------|
| Rupert     | Pearse    | Programme Director    | r.pearse@qmul.ac.uk              | Professor and consultant in Intensive Care Medicine - <i>Queen Mary University London / Barts Health NHS Trust</i>                           |
| John       | Prowle    | Programme Co-director | j.prowle@qmul.ac.uk              | Senior Clinical Lecturer in Intensive Care Medicine - <i>Queen Mary University London / Barts Health NHS Trust</i>                           |
| Alex       | Fowler    | Lead Investigator     | a.fowler@qmul.ac.uk              | Research Fellow with special interest in data analysis and systematic reviews - <i>Queen Mary University London / Barts Health NHS Trust</i> |
| David      | Cromwell  | Senior Investigator   | dcromwell@rcseng.ac.uk           | Professor of Health Services Research – <i>LSHTM/Royal College of Surgeons</i>                                                               |
| Kambiz     | Boomla    | Senior Investigator   | k.boomla@qmul.ac.uk              | Clinical Senior Lecturer and GP, Clinical Lead in the Clinical Effectiveness Group - <i>Queen Mary University London</i>                     |
| Adam       | Brayne    | Collaborator          | abrayne@doctors.org.uk           | Department of infection - <i>Barts Health NHS Trust</i>                                                                                      |
| Bhavi      | Trivedi   | Collaborator          | Bhavi.Trivedi@bartshealth.nhs.uk | Clinical Research Fellow - <i>Barts Health NHS Trust</i>                                                                                     |

### **Project 2.3: Collation of quality of life dataset**

| First Name | Last name | Role in OSIRIS | Contact details     | Background/Affiliations                               |
|------------|-----------|----------------|---------------------|-------------------------------------------------------|
| Rupert     | Pearse    | Programme      | r.pearse@qmul.ac.uk | Professor and consultant in Intensive Care Medicine - |

|        |          |                       |                        |                                                                                                                                              |
|--------|----------|-----------------------|------------------------|----------------------------------------------------------------------------------------------------------------------------------------------|
|        |          | Director              |                        | <i>Queen Mary University London / Barts Health NHS Trust</i>                                                                                 |
| John   | Prowle   | Programme Co-director | j.prowle@qmul.ac.uk    | Senior Clinical Lecturer in Intensive Care Medicine - <i>Queen Mary University London / Barts Health NHS Trust</i>                           |
| Alex   | Fowler   | Lead Investigator     | a.fowler@qmul.ac.uk    | Research Fellow with special interest in data analysis and systematic reviews - <i>Queen Mary University London / Barts Health NHS Trust</i> |
| David  | Cromwell | Senior Investigator   | dcromwell@rcseng.ac.uk | Professor of Health Services Research – <i>LSHTM/Royal College of Surgeons</i>                                                               |
| Kambiz | Boomla   | Senior Investigator   | k.boomla@qmul.ac.uk    | Clinical Senior Lecturer and GP, Clinical Lead in the Clinical Effectiveness Group - <i>Queen Mary University London</i>                     |

### **Project 3.1: Modelling outcomes for high-risk patients contemplating major surgery**

| First Name | Last name | Role in OSIRIS         | Contact details                   | Background/Affiliations                                                                                                          |
|------------|-----------|------------------------|-----------------------------------|----------------------------------------------------------------------------------------------------------------------------------|
| Rupert     | Pearse    | Programme Director     | r.pearse@qmul.ac.uk               | Professor and consultant in Intensive Care Medicine - <i>Queen Mary University London / Barts Health NHS Trust</i>               |
| John       | Prowle    | Programme Co-director  | j.prowle@qmul.ac.uk               | Senior Clinical Lecturer in Intensive Care Medicine - <i>Queen Mary University London / Barts Health NHS Trust</i>               |
| William    | Marsh     | Lead Investigator      | d.w.r.marsh@qmul.ac.uk            | Senior lecturer with special interest in decision support models - <i>Queen Mary University London</i>                           |
| Charles    | Knowles   | Clinical Advisor       | c.h.knowles@qmul.ac.uk            | Professor of Surgery, Deputy Director of Research and Director of National Bowel Research Centre - <i>Barts Health NHS Trust</i> |
| Joseph     | Wherton   | Senior Co-Investigator | joseph.wherton@phc.ox.ac.uk       | Senior researcher with a background in psychology and human-computer interaction - <i>Oxford University</i>                      |
| Neil       | MacDonald | Clinical Advisor       | Neil.Macdonald@bartshealth.nhs.uk | Consultant anaesthetist - <i>Barts Health NHS Trust</i>                                                                          |
| Sara       | Shaw      | Senior Co-Investigator | sara.shaw@phc.ox.ac.uk            | Professor of Health & Social Policy with a background in sociology - <i>Oxford University</i>                                    |

### **Project 3.2: Co-design of the decision support intervention and implementation planning**

| First Name | Last name | Role in OSIRIS         | Contact details                   | Background/Affiliations                                                                                                          |
|------------|-----------|------------------------|-----------------------------------|----------------------------------------------------------------------------------------------------------------------------------|
| Rupert     | Pearse    | Programme Director     | r.pearse@qmul.ac.uk               | Professor and consultant in Intensive Care Medicine - <i>Queen Mary University London / Barts Health NHS Trust</i>               |
| John       | Prowle    | Programme Co-director  | j.prowle@qmul.ac.uk               | Senior Clinical Lecturer in Intensive Care Medicine - <i>Queen Mary University London / Barts Health NHS Trust</i>               |
| William    | Marsh     | Lead Investigator      | d.w.r.marsh@qmul.ac.uk            | Senior lecturer with special interest in decision support models - <i>Queen Mary University London</i>                           |
| Charles    | Knowles   | Clinical Advisor       | c.h.knowles@qmul.ac.uk            | Professor of Surgery, Deputy Director of Research and Director of National Bowel Research Centre - <i>Barts Health NHS Trust</i> |
| Joseph     | Wherton   | Senior Co-Investigator | joseph.wherton@phc.ox.ac.uk       | Senior researcher with a background in psychology and human-computer interaction - <i>Oxford University</i>                      |
| Neil       | MacDonald | Clinical Advisor       | Neil.Macdonald@bartshealth.nhs.uk | Consultant anaesthetist - <i>Barts Health NHS Trust</i>                                                                          |
| Sara       | Shaw      | Senior Co-Investigator | sara.shaw@phc.ox.ac.uk            | Professor of Health & Social Policy with a background in sociology - <i>Oxford University</i>                                    |

### **Project 4.1: Testing the feasibility of the decision support intervention**

| First Name | Last name | Role      | Contact details     | Affiliations                                          |
|------------|-----------|-----------|---------------------|-------------------------------------------------------|
| Rupert     | Pearse    | Programme | r.pearse@qmul.ac.uk | Professor and consultant in Intensive Care Medicine - |



|         |           |                            |                                  |                                                                                                                                                |
|---------|-----------|----------------------------|----------------------------------|------------------------------------------------------------------------------------------------------------------------------------------------|
|         |           | Director                   |                                  | <i>Queen Mary University London / Barts Health NHS Trust</i>                                                                                   |
| John    | Prowle    | Programme Co-director      | j.prowle@qmul.ac.uk              | Senior Clinical Lecturer in Intensive Care Medicine - <i>Queen Mary University London / Barts Health NHS Trust</i>                             |
| Tim     | Stephens  | Investigator               | t.t.stephens@qmul.ac.uk          | Nurse Researcher with special interest critical care and perioperative medicine - <i>Queen Mary University London / Barts Health NHS Trust</i> |
| Ann     | Thomson   | Senior trials co-ordinator | ann.thomson@qmul.ac.uk           | Senior Trial Manager - <i>Queen Mary University London</i>                                                                                     |
| Mel     | Smuk      | Statistician               | m.smuk@qmul.ac.uk                | Senior Statistician and Lecturer in Medical Statistics - <i>Queen Mary University London</i>                                                   |
| Charles | Knowles   | Clinical Advisor           | c.h.knowles@qmul.ac.uk           | Professor of Surgery, Deputy Director of Research and Director of National Bowel Research Centre - <i>Barts Health NHS Trust</i>               |
| Neil    | MacDonald | Clinical Advisor           | Neil.Macdonald@barthealth.nhs.uk | Consultant anaesthetist - <i>Barts Health NHS Trust</i>                                                                                        |
| Sandra  | Eldridge  | Senior Co-Investigator     | s.eldridge@qmul.ac.uk            | Professor of Biostatistics and Director of the Pragmatic Clinical Trials Unit, QMUL - <i>Queen Mary University London</i>                      |
| Sara    | Shaw      | Senior Co-Investigator     | sara.shaw@phc.ox.ac.uk           | Professor of Health & Social Policy with a background in sociology - <i>Oxford University</i>                                                  |

#### **Project 4.2: Cluster randomised trial**

| First Name | Surname   | Role in OSIRIS             | Contact details                  | Background/Affiliations                                                                                                                        |
|------------|-----------|----------------------------|----------------------------------|------------------------------------------------------------------------------------------------------------------------------------------------|
| Rupert     | Pearse    | Programme Director         | r.pearse@qmul.ac.uk              | Professor and consultant in Intensive Care Medicine - <i>Queen Mary University London / Barts Health NHS Trust</i>                             |
| John       | Prowle    | Programme Co-director      | j.prowle@qmul.ac.uk              | Senior Clinical Lecturer in Intensive Care Medicine - <i>Queen Mary University London / Barts Health NHS Trust</i>                             |
| Tim        | Stephens  | Investigator               | t.t.stephens@qmul.ac.uk          | Nurse Researcher with special interest critical care and perioperative medicine - <i>Queen Mary University London / Barts Health NHS Trust</i> |
| Ann        | Thomson   | Senior trials co-ordinator | ann.thomson@qmul.ac.uk           | Senior Trial Manager - <i>Queen Mary University London</i>                                                                                     |
| Mel        | Smuk      | Statistician               | m.smuk@qmul.ac.uk                | Senior Statistician and Lecturer in Medical Statistics - <i>Queen Mary University London</i>                                                   |
| Charles    | Knowles   | Clinical Advisor           | c.h.knowles@qmul.ac.uk           | Professor of Surgery, Deputy Director of Research and Director of National Bowel Research Centre - <i>Barts Health NHS Trust</i>               |
| Neil       | MacDonald | Clinical Advisor           | Neil.Macdonald@barthealth.nhs.uk | Consultant anaesthetist - <i>Barts Health NHS Trust</i>                                                                                        |
| Sandra     | Eldridge  | Senior Co-Investigator     | s.eldridge@qmul.ac.uk            | Professor of Biostatistics and Director of the Pragmatic Clinical Trials Unit, QMUL - <i>Queen Mary University London</i>                      |
| Sara       | Shaw      | Senior Co-Investigator     | sara.shaw@phc.ox.ac.uk           | Professor of Health & Social Policy with a background in sociology - <i>Oxford University</i>                                                  |

#### **Project 4.3: Mixed method process evaluation of the OSIRIS cluster trial**

| First Name | Surname  | Role in OSIRIS        | Contact details         | Background/Affiliations                                                                                                                        |
|------------|----------|-----------------------|-------------------------|------------------------------------------------------------------------------------------------------------------------------------------------|
| Rupert     | Pearse   | Programme Director    | r.pearse@qmul.ac.uk     | Professor and consultant in Intensive Care Medicine - <i>Queen Mary University London / Barts Health NHS Trust</i>                             |
| John       | Prowle   | Programme Co-director | j.prowle@qmul.ac.uk     | Senior Clinical Lecturer in Intensive Care Medicine - <i>Queen Mary University London / Barts Health NHS Trust</i>                             |
| Tim        | Stephens | Investigator          | t.t.stephens@qmul.ac.uk | Nurse Researcher with special interest critical care and perioperative medicine - <i>Queen Mary University London / Barts Health NHS Trust</i> |

|         |           |                            |                                  |                                                                                                                                  |
|---------|-----------|----------------------------|----------------------------------|----------------------------------------------------------------------------------------------------------------------------------|
| Ann     | Thomson   | Senior trials co-ordinator | ann.thomson@qmul.ac.uk           | Senior Trial Manager - <i>Queen Mary University London</i>                                                                       |
| Mel     | Smuk      | Statistician               | m.smuk@qmul.ac.uk                | Senior Statistician and Lecturer in Medical Statistics - <i>Queen Mary University London</i>                                     |
| Charles | Knowles   | Clinical Advisor           | c.h.knowles@qmul.ac.uk           | Professor of Surgery, Deputy Director of Research and Director of National Bowel Research Centre - <i>Barts Health NHS Trust</i> |
| Neil    | MacDonald | Clinical Advisor           | Neil.Macdonald@barthealth.nhs.uk | Consultant anaesthetist - <i>Barts Health NHS Trust</i>                                                                          |
| Sandra  | Eldridge  | Senior Co-Investigator     | s.eldridge@qmul.ac.uk            | Professor of Biostatistics and Director of the Pragmatic Clinical Trials Unit, QMUL - <i>Queen Mary University London</i>        |
| Sara    | Shaw      | Senior Co-Investigator     | sara.shaw@phc.ox.ac.uk           | Professor of Health & Social Policy with a background in sociology - <i>Oxford University</i>                                    |

#### **Project 4.4: Health economic analyses**

| First Name | Surname   | Role in OSIRIS          | Contact details        | Background/Affiliations                                                                                                        |
|------------|-----------|-------------------------|------------------------|--------------------------------------------------------------------------------------------------------------------------------|
| Rupert     | Pearse    | Programme Director      | r.pearse@qmul.ac.uk    | Professor and consultant in Intensive Care Medicine - <i>Queen Mary University London / Barts Health NHS Trust</i>             |
| John       | Prowle    | Programme Co-director   | j.prowle@qmul.ac.uk    | Senior Clinical Lecturer in Intensive Care Medicine - <i>Queen Mary University London / Barts Health NHS Trust</i>             |
| Borislava  | Mihaylova | Senior health economist | b.mihaylova@qmul.ac.uk | Chair and Professor of Health Economics at the Centre for Primary Care and Public Health - <i>Queen Mary University London</i> |
| Vladimir   | Gordeev   | Health economist        | v.gordeev@qmul.ac.uk   | Senior Health Economist - <i>Queen Mary University London</i>                                                                  |
| Sandra     | Eldridge  | Senior Co-Investigator  | s.eldridge@qmul.ac.uk  | Professor of Biostatistics and Director of the Pragmatic Clinical Trials Unit, QMUL - <i>Queen Mary University London</i>      |

#### **Programme Steering Committee (PSC) members:**

| First Name | Surname  | Role in OSIRIS                  | Contact details           | Background/Affiliations                                                                                            |
|------------|----------|---------------------------------|---------------------------|--------------------------------------------------------------------------------------------------------------------|
| Rupert     | Pearse   | Programme Director              | r.pearse@qmul.ac.uk       | Professor and consultant in Intensive Care Medicine - <i>Queen Mary University London / Barts Health NHS Trust</i> |
| John       | Prowle   | Programme Co-director           | j.prowle@qmul.ac.uk       | Senior Clinical Lecturer in Intensive Care Medicine - <i>Queen Mary University London / Barts Health NHS Trust</i> |
| Julian     | Bion     | Chair                           | J.F.BION@bham.ac.uk       | Professor Of Intensive Care Medicine - <i>University of Birmingham</i>                                             |
| Obi        | Ukoumunn | Independent Statistician member | o.c.ukoumunn@exeter.ac.uk | Associate Professor in Medical Statistics - <i>University of Exeter</i>                                            |
| Michael    | Swart    | Independent member              | michael.swart@nhs.uk      | Consultant in Anaesthesia and Critical Care Medicine - <i>Torbay and South Devon NHS Foundation Trust</i>          |
| John       | Hitchman | Lay member                      | jmhitchman@aol.com        | N/A                                                                                                                |

#### **Patient and public involvement group (PPI) members:**

| First Name | Surname  | Role in OSIRIS | Contact details                | Background/Affiliations                                                                                                                        |
|------------|----------|----------------|--------------------------------|------------------------------------------------------------------------------------------------------------------------------------------------|
| Lesley     | Booth    | PPI organiser  | lesley@bowelcancerresearch.org | Lead in Patient and Public Involvement – <i>Bowel &amp; Cancer Research</i>                                                                    |
| Tim        | Stephens | PPI organiser  | t.t.stephens@qmul.ac.uk        | Nurse Researcher with special interest critical care and perioperative medicine - <i>Queen Mary University London / Barts Health NHS Trust</i> |
| Leslie     | Everest  | PPI Chair      | leslieeverest2017@g            | Extensive experience in decision making for high-risk                                                                                          |



|       |         |           |                                     |                                                                |
|-------|---------|-----------|-------------------------------------|----------------------------------------------------------------|
|       |         |           | mail.com                            | surgery and sat on previous PPI committees                     |
| Nigel | Horwood | PPI Chair | nigelhorwood@btinternet.com         | Extensive experience in decision making for high-risk surgery. |
| Len   | Evans   | PPI       | lenevans1@btinternet.com            | Extensive experience in decision making for high-risk surgery. |
| Gael  | Ramsey  | PPI       | gaelramsey@msn.com                  | Extensive experience in decision making for high-risk surgery. |
| Eve   | Smyth   | PPI       | fairlady@adrianjs.free-online.co.uk | Extensive experience in decision making for high-risk surgery. |
| Brian | Morris  | PPI       | bmazing@yahoo.co.uk                 | Extensive experience in decision making for high-risk surgery. |

For peer review only

## Standards for Reporting Qualitative Research (SRQR)

O'Brien B.C., Harris, I.B., Beckman, T.J., Reed, D.A., & Cook, D.A. (2014). Standards for reporting qualitative research: a synthesis of recommendations. *Academic Medicine*, 89(9), 1245-1251.

| No. | Topic                                        | Item                                                                                                                                                                                                                                                                                                                                     | Page/Line                  |
|-----|----------------------------------------------|------------------------------------------------------------------------------------------------------------------------------------------------------------------------------------------------------------------------------------------------------------------------------------------------------------------------------------------|----------------------------|
|     | <b>Title and abstract</b>                    |                                                                                                                                                                                                                                                                                                                                          |                            |
| S1  | Title                                        | Concise description of the nature and topic of the study identifying the study as qualitative or indicating the approach (e.g., ethnography, grounded theory) or data collection methods (e.g., interview, focus group) is recommended                                                                                                   | Page 1                     |
| S2  | Abstract                                     | Summary of key elements of the study using the abstract format of the intended publication; typically includes objective, methods, results, and conclusions                                                                                                                                                                              | Page 3                     |
|     | <b>Introduction</b>                          |                                                                                                                                                                                                                                                                                                                                          |                            |
| S3  | Problem formulation                          | Description and significance of the problem/phenomenon studied; review of relevant theory and empirical work; problem statement                                                                                                                                                                                                          | Pps 5-7<br>Page 9          |
| S4  | Purpose or research question                 | Purpose of the study and specific objectives or questions                                                                                                                                                                                                                                                                                | Page 8                     |
|     | <b>Methods</b>                               |                                                                                                                                                                                                                                                                                                                                          |                            |
| S5  | Qualitative approach and research paradigm   | Qualitative approach (e.g., ethnography, grounded theory, case study, phenomenology, narrative research) and guiding theory if appropriate; identifying the research paradigm (e.g., positivist, constructivist/interpretivist) is also recommended                                                                                      | Pps 8-9                    |
| S6  | Researcher characteristics and reflexivity   | Researchers' characteristics that may influence the research, including personal attributes, qualifications/experience, relationship with participants, assumptions, or presuppositions; potential or actual interaction between researchers' characteristics and the research questions, approach, methods, results, or transferability | Page 8                     |
| S7  | Context                                      | Setting/site and salient contextual factors; rationale <sup>a</sup>                                                                                                                                                                                                                                                                      | Page 9-10                  |
| S8  | Sampling strategy                            | How and why research participants, documents, or events were selected; criteria for deciding when no further sampling was necessary (e.g., sampling saturation); rationale <sup>a</sup>                                                                                                                                                  | Pps 10-12,<br>Table 1, p21 |
| S9  | Ethical issues pertaining to human subjects  | Documentation of approval by an appropriate ethics review board and participant consent, or explanation for lack thereof; other confidentiality and data security issues                                                                                                                                                                 | Page 15                    |
| S10 | Data collection methods                      | Types of data collected; details of data collection procedures including (as appropriate) start and stop dates of data collection and analysis, iterative process, triangulation of sources/methods, and modification of procedures in response to evolving study findings; rationale <sup>a</sup>                                       | Pps 10-12                  |
| S11 | Data collection instruments and technologies | Description of instruments (e.g., interview guides, questionnaires) and devices (e.g., audio recorders) used for data collection; if/how the instrument(s) changed over the course of the study                                                                                                                                          | Pps 11-12                  |
| S12 | Units of study                               | Number and relevant characteristics of participants, documents, or events included in the study; level of participation (could be reported in results)                                                                                                                                                                                   | Table 1, p21               |



|                         |                                                                                              |                                                                                                                                                                                                                                                                                                       |                            |
|-------------------------|----------------------------------------------------------------------------------------------|-------------------------------------------------------------------------------------------------------------------------------------------------------------------------------------------------------------------------------------------------------------------------------------------------------|----------------------------|
| S13                     | Data processing                                                                              | Methods for processing data prior to and during analysis, including transcription, data entry, data management and security, verification of data integrity, data coding, and anonymization/deidentification of excerpts                                                                              | Page 13<br>Table 2, p22    |
| S14                     | Data analysis                                                                                | Process by which inferences, themes, etc., were identified and developed, including researchers involved in data analysis; usually references a specific paradigm or approach; rationale <sup>a</sup>                                                                                                 | Pps 12-14                  |
| S15                     | Techniques to enhance trustworthiness                                                        | Techniques to enhance trustworthiness and credibility of data analysis (e.g., member checking, audit trail, triangulation); rationale <sup>a</sup>                                                                                                                                                    | Page 12<br>Table 2, p22    |
| <b>Results/Findings</b> |                                                                                              |                                                                                                                                                                                                                                                                                                       |                            |
| S16                     | Synthesis and interpretation                                                                 | Main findings (e.g., interpretations, inferences, and themes); might include development of a theory or model, or integration with prior research or theory                                                                                                                                           | N/a –<br>protocol<br>paper |
| S17                     | Links to empirical data                                                                      | Evidence (e.g., quotes, field notes, text excerpts, photographs) to substantiate analytic findings                                                                                                                                                                                                    | N/a protocol<br>paper      |
| <b>Discussion</b>       |                                                                                              |                                                                                                                                                                                                                                                                                                       |                            |
| S18                     | Integration with prior work, implications, transferability, and contribution(s) to the field | Short summary of main findings; explanation of how findings and conclusions connect to, support, elaborate on, or challenge conclusions of earlier scholarship; discussion of scope of application/generalizability; identification of unique contribution(s) to scholarship in a discipline or field | N/a –<br>protocol<br>paper |
| S19                     | Limitations                                                                                  | Trustworthiness and limitations of findings                                                                                                                                                                                                                                                           | N/a –<br>protocol<br>paper |
| <b>Other</b>            |                                                                                              |                                                                                                                                                                                                                                                                                                       |                            |
| S20                     | Conflicts of interest                                                                        | Potential sources of influence or perceived influence on study conduct and conclusions; how these were managed                                                                                                                                                                                        | Page 17                    |
| S21                     | Funding                                                                                      | Sources of funding and other support; role of funders in data collection, interpretation, and reporting                                                                                                                                                                                               | Page 17                    |

<sup>a</sup>The rationale should briefly discuss the justification for choosing that theory, approach, method, or technique rather than other options available, the assumptions and limitations implicit in those choices, and how those choices influence study conclusions and transferability. As appropriate, the rationale for several items might be discussed together.
