# Supplementary material for: Understanding decision making about major surgery: protocol for a qualitative study of shared decision making by high-risk patients and their clinical teams
Source: PubMed Central journal article supplement — BMJ Open. 2020 May 5;10(5):e033703. doi: 10.1136/bmjopen-2019-033703 (PMC7223149; doi:10.1136/bmjopen-2019-033703), 2020-05-05
Supplement: bmjopen-2019-033703supp001.pdf [file bmjopen-2019-033703supp001.pdf]

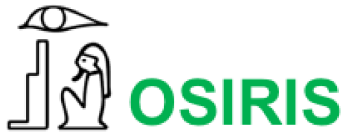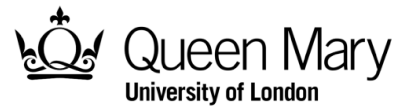

# OSIRIS

## Programme group list

3<sup>rd</sup> February 2020

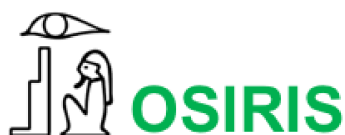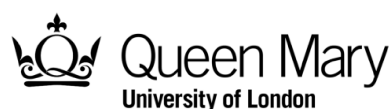

**Important note: 'bartshealth.nhs.uk' are liable to change to 'nhs.net' email addresses in the near future. Update these when possible, as peoples emails might change.**

**Programme Directors:**

| First Name | Last name | Role in OSIRIS        | Contact details     | Background/Affiliations                                                                                            |
|------------|-----------|-----------------------|---------------------|--------------------------------------------------------------------------------------------------------------------|
| Rupert     | Pearse    | Programme Director    | r.pearse@qmul.ac.uk | Professor and consultant in Intensive Care Medicine - <i>Queen Mary University London / Barts Health NHS Trust</i> |
| John       | Prowle    | Programme Co-director | j.prowle@qmul.ac.uk | Senior Clinical Lecturer in Intensive Care Medicine - <i>Queen Mary University London / Barts Health NHS Trust</i> |

**Management group:**

| First Name | Last name  | Role in OSIRIS             | Contact details                | Background/Affiliations                                                                                                                        |
|------------|------------|----------------------------|--------------------------------|------------------------------------------------------------------------------------------------------------------------------------------------|
| Rupert     | Pearse     | Programme Director         | r.pearse@qmul.ac.uk            | Professor and consultant in Intensive Care Medicine - <i>Queen Mary University London / Barts Health NHS Trust</i>                             |
| John       | Prowle     | Programme Co-director      | j.prowle@qmul.ac.uk            | Senior Clinical Lecturer in Intensive Care Medicine - <i>Queen Mary University London / Barts Health NHS Trust</i>                             |
| Tim        | Stephens   | Investigator               | t.t.stephens@qmul.ac.uk        | Nurse Researcher with special interest critical care and perioperative medicine - <i>Queen Mary University London / Barts Health NHS Trust</i> |
| Alex       | Fowler     | Investigator               | a.fowler@qmul.ac.uk            | Research Fellow with special interest in data analysis and systematic reviews - <i>Queen Mary University London / Barts Health NHS Trust</i>   |
| Ruzena     | Uddin      | Senior trials co-ordinator | ruzena.uddin@qmul.ac.uk        | Senior Trial Co-ordinator - <i>Queen Mary University London</i>                                                                                |
| Bethan     | O'Connor   | Trials co-ordinator        | b.griffiths@qmul.ac.uk         | Trial Co-ordinator - <i>Queen Mary University London</i>                                                                                       |
| Mari-Liis  | Pakats     | Research co-ordinator      | m.pakats@qmul.ac.uk            | Senior Trial Co-ordinator - <i>Queen Mary University London</i>                                                                                |
| Alastair   | Somerville | Trials co-ordinator        | alastair.somerville@qmul.ac.uk | Trial Co-ordinator - <i>Queen Mary University London</i>                                                                                       |

**Project 1: Phase 1: Interviews and video recordings of shared decision making encounters between doctors and patients considering major surgery, & Phase 2: Qualitative focus group discussions with patients and doctors after surgery:**

| First Name | Last name      | Role in OSIRIS             | Contact details                       | Background/Affiliations                                                                                                                        |
|------------|----------------|----------------------------|---------------------------------------|------------------------------------------------------------------------------------------------------------------------------------------------|
| Rupert     | Pearse         | Programme Director         | r.pearse@qmul.ac.uk                   | Professor and consultant in Intensive Care Medicine - <i>Queen Mary University London / Barts Health NHS Trust</i>                             |
| John       | Prowle         | Programme Co-director      | j.prowle@qmul.ac.uk                   | Senior Clinical Lecturer in Intensive Care Medicine - <i>Queen Mary University London / Barts Health NHS Trust</i>                             |
| Sara       | Shaw           | Project Chief Investigator | sara.shaw@phc.ox.ac.uk                | Professor of Health & Social Policy with a background in sociology - <i>Oxford University</i>                                                  |
| Tim        | Stephens       | Investigator               | t.t.stephens@qmul.ac.uk               | Nurse Researcher with special interest critical care and perioperative medicine - <i>Queen Mary University London / Barts Health NHS Trust</i> |
| Gemma      | Hughes         | Investigator               | gemma.hughes@phc.ox.ac.uk             | Health services researcher with a background in sociology and NHS management - <i>Oxford University</i>                                        |
| Charlotte  | Thompson-Grant | Administrator              | charlotte.thompson-grant@phc.ox.ac.uk | Personal Assistant and administrator - <i>Oxford University</i>                                                                                |

OSIRIS Programme Group List v1.0, 20-May-2019

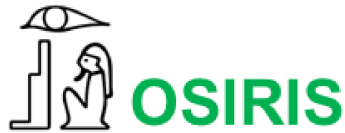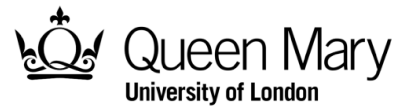

|          |           |                                       |                                   |                                                                                                             |
|----------|-----------|---------------------------------------|-----------------------------------|-------------------------------------------------------------------------------------------------------------|
| James    | Day       | Local Investigator                    | James.Day@ouh.nhs.uk              | Consultant anaesthetist and intensive care specialist - <i>Oxford University Hospital</i>                   |
| Jennifer | Edwards   | Local Investigator                    | j.edwards10@nhs.net               | Consultant anaesthetist - <i>Royal Alexandra Hospital</i>                                                   |
| Mark     | Edsel     | Local Investigator (until 20/06/2019) | Mark.Edsell@stgeorges.nhs.uk      | Consultant anaesthetist with a special interest in cardiothoracic anaesthesia - <i>St George's Hospital</i> |
| Ester    | Avagliano | Local Investigator (from 11/07/2019)  | Esther.Avagliano@stgeorges.nhs.uk | Consultant anaesthetist with a special interest in cardiothoracic anaesthesia - <i>St George's Hospital</i> |
| Joseph   | Wherton   | Senior Co-Investigator                | joseph.wherton@phc.ox.ac.uk       | Senior researcher with a background in psychology and human-computer interaction - <i>Oxford University</i> |
| Andrew   | Wragg     | Consultant Cardiologist               | Andrew.wragg2@nhs.net             | Honorary Senior Lecturer in Cardiology and Consultant Cardiologist - <i>Barts Health</i>                    |

### **Project 1.3: Comparison of patient and doctor decision making frameworks**

| First Name | Last name  | Role in OSIRIS             | Contact details                      | Background/Affiliations                                                                                                                        |
|------------|------------|----------------------------|--------------------------------------|------------------------------------------------------------------------------------------------------------------------------------------------|
| Rupert     | Pearse     | Programme Director         | r.pearse@qmul.ac.uk                  | Professor and consultant in Intensive Care Medicine - <i>Queen Mary University London / Barts Health NHS Trust</i>                             |
| John       | Prowle     | Programme Co-director      | j.prowle@qmul.ac.uk                  | Senior Clinical Lecturer in Intensive Care Medicine - <i>Queen Mary University London / Barts Health NHS Trust</i>                             |
| Magda      | Osman      | Project Chief Investigator | m.osman@qmul.ac.uk                   | Reader in Experimental Psychology with special interest in decision-making and learning - <i>Queen Mary University London</i>                  |
| Tim        | Stephens   | Investigator               | t.t.stephens@qmul.ac.uk              | Nurse Researcher with special interest critical care and perioperative medicine - <i>Queen Mary University London / Barts Health NHS Trust</i> |
| Agata      | Ludwiczak  | Post-doc researcher        | a.ryterska@qmul.ac.uk                | Post-doctoral researcher with special interest in decision making - <i>Queen Mary University London</i>                                        |
| Joseph     | Wherton    | Senior Co-Investigator     | joseph.wherton@phc.ox.ac.uk          | Senior researcher with a background in psychology and human-computer interaction - <i>Oxford University</i>                                    |
| Steven     | Millington | Clinical advisor           | Steven.Millington@bartshealth.nhs.uk | Consultant Trauma and Orthopaedic Surgeon - <i>Barts Health NHS Trust</i>                                                                      |
| Sammy      | Hanna      | Clinical advisor           | Sammy.Hanna@bartshealth.nhs.uk       | Consultant orthopaedic surgeon with a specialist interest in hip and knee disorders - <i>Barts Health NHS Trust</i>                            |
| Neil       | Roberts    | Clinical advisor           |                                      | Consultant cardiac surgeon - <i>Barts Health NHS Trust</i>                                                                                     |
| Charles    | Knowles    | Clinical advisor           | c.h.knowles@qmul.ac.uk               | Professor of Surgery, Deputy Director of Research and Director of National Bowel Research Centre - <i>Barts Health NHS Trust</i>               |

### **Project 1.4: Discrete choice surgical decision making experiments**

| First Name | Last name | Role in OSIRIS             | Contact details         | Background/Affiliations                                                                                                                        |
|------------|-----------|----------------------------|-------------------------|------------------------------------------------------------------------------------------------------------------------------------------------|
| Rupert     | Pearse    | Programme Director         | r.pearse@qmul.ac.uk     | Professor and consultant in Intensive Care Medicine - <i>Queen Mary University London / Barts Health NHS Trust</i>                             |
| John       | Prowle    | Programme Co-director      | j.prowle@qmul.ac.uk     | Senior Clinical Lecturer in Intensive Care Medicine - <i>Queen Mary University London / Barts Health NHS Trust</i>                             |
| Francesca  | Cornaglia | Project Chief Investigator | f.cornaglia@qmul.ac.uk  | Reader in Economics with a special interest in health economics - <i>Queen Mary University London</i>                                          |
| Tim        | Stephens  | Investigator               | t.t.stephens@qmul.ac.uk | Nurse Researcher with special interest critical care and perioperative medicine - <i>Queen Mary University London / Barts Health NHS Trust</i> |
| Joseph     | Wherton   | Senior Co-                 | joseph.wherton@phc.     | Senior researcher with a background in psychology                                                                                              |

OSIRIS Programme Group List v1.0, 20-May-2019



|            |            |                  |                                      |                                                                                                                     |
|------------|------------|------------------|--------------------------------------|---------------------------------------------------------------------------------------------------------------------|
|            |            | Investigator     | ox.ac.uk                             | and human-computer interaction - <i>Oxford University</i>                                                           |
| Steven     | Millington | Clinical advisor | Steven.Millington@bartshealth.nhs.uk | Consultant Trauma and Orthopaedic Surgeon - <i>Barts Health NHS Trust</i>                                           |
| Sammy      | Hanna      | Clinical advisor | Sammy.Hanna@bartshealth.nhs.uk       | Consultant orthopaedic surgeon with a specialist interest in hip and knee disorders - <i>Barts Health NHS Trust</i> |
| Alessandro | Iaria      | Collaborator     | alessandro.iaria@bristol.ac.uk       | Lecturer in economics with a special interest in applied econometrics - <i>Bristol University</i>                   |
| Eugenio    | Merlano    | Collaborator     | e.f.merlanolombana@qmul.ac.uk        | PhD student in the School of Economics and Finance - <i>Queen Mary University London</i>                            |

### **Project 2.1: Long-term surgical outcomes in the UK population**

| First Name | Last name | Role in OSIRIS        | Contact details          | Background/Affiliations                                                                                                                                      |
|------------|-----------|-----------------------|--------------------------|--------------------------------------------------------------------------------------------------------------------------------------------------------------|
| Rupert     | Pearse    | Programme Director    | r.pearse@qmul.ac.uk      | Professor and consultant in Intensive Care Medicine - <i>Queen Mary University London / Barts Health NHS Trust</i>                                           |
| John       | Prowle    | Programme Co-director | j.prowle@qmul.ac.uk      | Senior Clinical Lecturer in Intensive Care Medicine - <i>Queen Mary University London / Barts Health NHS Trust</i>                                           |
| Alex       | Fowler    | Lead Investigator     | a.fowler@qmul.ac.uk      | Research Fellow with special interest in data analysis and systematic reviews - <i>Queen Mary University London / Barts Health NHS Trust</i>                 |
| David      | Cromwell  | Senior Investigator   | dcromwell@rcseng.ac.uk   | Professor of Health Services Research – <i>LSHTM/Royal College of Surgeons</i>                                                                               |
| Kambiz     | Boomla    | Senior Investigator   | k.boomla@qmul.ac.uk      | Clinical Senior Lecturer and GP, Clinical Lead in the Clinical Effectiveness Group - <i>Queen Mary University London</i>                                     |
| Michael    | Gillies   | Collaborator          | michael.gillies@ed.ac.uk | Honorary Clinical Reader, Consultant and Associate Medical Director with special interest in perioperative intensive care - <i>Royal Infirmary Edinburgh</i> |
| Ewen       | Harrison  | Collaborator          | ewen.harrison@gmail.com  | Professor of Surgery and Data Science and Honorary Consultant Surgeon - <i>University of Edinburgh</i>                                                       |

### **Project 2.2: Burden of primary and secondary care for high-risk patients before and after major**

| First Name | Last name | Role in OSIRIS        | Contact details                  | Background/Affiliations                                                                                                                      |
|------------|-----------|-----------------------|----------------------------------|----------------------------------------------------------------------------------------------------------------------------------------------|
| Rupert     | Pearse    | Programme Director    | r.pearse@qmul.ac.uk              | Professor and consultant in Intensive Care Medicine - <i>Queen Mary University London / Barts Health NHS Trust</i>                           |
| John       | Prowle    | Programme Co-director | j.prowle@qmul.ac.uk              | Senior Clinical Lecturer in Intensive Care Medicine - <i>Queen Mary University London / Barts Health NHS Trust</i>                           |
| Alex       | Fowler    | Lead Investigator     | a.fowler@qmul.ac.uk              | Research Fellow with special interest in data analysis and systematic reviews - <i>Queen Mary University London / Barts Health NHS Trust</i> |
| David      | Cromwell  | Senior Investigator   | dcromwell@rcseng.ac.uk           | Professor of Health Services Research – <i>LSHTM/Royal College of Surgeons</i>                                                               |
| Kambiz     | Boomla    | Senior Investigator   | k.boomla@qmul.ac.uk              | Clinical Senior Lecturer and GP, Clinical Lead in the Clinical Effectiveness Group - <i>Queen Mary University London</i>                     |
| Adam       | Brayne    | Collaborator          | abrayne@doctors.org.uk           | Department of infection - <i>Barts Health NHS Trust</i>                                                                                      |
| Bhavi      | Trivedi   | Collaborator          | Bhavi.Trivedi@bartshealth.nhs.uk | Clinical Research Fellow - <i>Barts Health NHS Trust</i>                                                                                     |

### **Project 2.3: Collation of quality of life dataset**

| First Name | Last name | Role in OSIRIS | Contact details     | Background/Affiliations                               |
|------------|-----------|----------------|---------------------|-------------------------------------------------------|
| Rupert     | Pearse    | Programme      | r.pearse@qmul.ac.uk | Professor and consultant in Intensive Care Medicine - |

OSIRIS Programme Group List v1.0, 20-May-2019



|        |          |                       |                        |                                                                                                                                              |
|--------|----------|-----------------------|------------------------|----------------------------------------------------------------------------------------------------------------------------------------------|
|        |          | Director              |                        | <i>Queen Mary University London / Barts Health NHS Trust</i>                                                                                 |
| John   | Prowle   | Programme Co-director | j.prowle@qmul.ac.uk    | Senior Clinical Lecturer in Intensive Care Medicine - <i>Queen Mary University London / Barts Health NHS Trust</i>                           |
| Alex   | Fowler   | Lead Investigator     | a.fowler@qmul.ac.uk    | Research Fellow with special interest in data analysis and systematic reviews - <i>Queen Mary University London / Barts Health NHS Trust</i> |
| David  | Cromwell | Senior Investigator   | dcromwell@rcseng.ac.uk | Professor of Health Services Research – <i>LSHTM/Royal College of Surgeons</i>                                                               |
| Kambiz | Boomla   | Senior Investigator   | k.boomla@qmul.ac.uk    | Clinical Senior Lecturer and GP, Clinical Lead in the Clinical Effectiveness Group - <i>Queen Mary University London</i>                     |

### **Project 3.1: Modelling outcomes for high-risk patients contemplating major surgery**

| First Name | Last name | Role in OSIRIS         | Contact details                  | Background/Affiliations                                                                                                          |
|------------|-----------|------------------------|----------------------------------|----------------------------------------------------------------------------------------------------------------------------------|
| Rupert     | Pearse    | Programme Director     | r.pearse@qmul.ac.uk              | Professor and consultant in Intensive Care Medicine - <i>Queen Mary University London / Barts Health NHS Trust</i>               |
| John       | Prowle    | Programme Co-director  | j.prowle@qmul.ac.uk              | Senior Clinical Lecturer in Intensive Care Medicine - <i>Queen Mary University London / Barts Health NHS Trust</i>               |
| William    | Marsh     | Lead Investigator      | d.w.r.marsh@qmul.ac.uk           | Senior lecturer with special interest in decision support models - <i>Queen Mary University London</i>                           |
| Charles    | Knowles   | Clinical Advisor       | c.h.knowles@qmul.ac.uk           | Professor of Surgery, Deputy Director of Research and Director of National Bowel Research Centre - <i>Barts Health NHS Trust</i> |
| Joseph     | Wherton   | Senior Co-Investigator | joseph.wherton@phc.ox.ac.uk      | Senior researcher with a background in psychology and human-computer interaction - <i>Oxford University</i>                      |
| Neil       | MacDonald | Clinical Advisor       | Neil.Macdonald@barthealth.nhs.uk | Consultant anaesthetist - <i>Barts Health NHS Trust</i>                                                                          |
| Sara       | Shaw      | Senior Co-Investigator | sara.shaw@phc.ox.ac.uk           | Professor of Health & Social Policy with a background in sociology - <i>Oxford University</i>                                    |

### **Project 3.2: Co-design of the decision support intervention and implementation planning**

| First Name | Last name | Role in OSIRIS         | Contact details                  | Background/Affiliations                                                                                                          |
|------------|-----------|------------------------|----------------------------------|----------------------------------------------------------------------------------------------------------------------------------|
| Rupert     | Pearse    | Programme Director     | r.pearse@qmul.ac.uk              | Professor and consultant in Intensive Care Medicine - <i>Queen Mary University London / Barts Health NHS Trust</i>               |
| John       | Prowle    | Programme Co-director  | j.prowle@qmul.ac.uk              | Senior Clinical Lecturer in Intensive Care Medicine - <i>Queen Mary University London / Barts Health NHS Trust</i>               |
| William    | Marsh     | Lead Investigator      | d.w.r.marsh@qmul.ac.uk           | Senior lecturer with special interest in decision support models - <i>Queen Mary University London</i>                           |
| Charles    | Knowles   | Clinical Advisor       | c.h.knowles@qmul.ac.uk           | Professor of Surgery, Deputy Director of Research and Director of National Bowel Research Centre - <i>Barts Health NHS Trust</i> |
| Joseph     | Wherton   | Senior Co-Investigator | joseph.wherton@phc.ox.ac.uk      | Senior researcher with a background in psychology and human-computer interaction - <i>Oxford University</i>                      |
| Neil       | MacDonald | Clinical Advisor       | Neil.Macdonald@barthealth.nhs.uk | Consultant anaesthetist - <i>Barts Health NHS Trust</i>                                                                          |
| Sara       | Shaw      | Senior Co-Investigator | sara.shaw@phc.ox.ac.uk           | Professor of Health & Social Policy with a background in sociology - <i>Oxford University</i>                                    |

### **Project 4.1: Testing the feasibility of the decision support intervention**

| First Name | Last name | Role      | Contact details     | Affiliations                                          |
|------------|-----------|-----------|---------------------|-------------------------------------------------------|
| Rupert     | Pearse    | Programme | r.pearse@qmul.ac.uk | Professor and consultant in Intensive Care Medicine - |

OSIRIS Programme Group List v1.0, 20-May-2019



|         |           |                            |                                    |                                                                                                                                                |
|---------|-----------|----------------------------|------------------------------------|------------------------------------------------------------------------------------------------------------------------------------------------|
|         |           | Director                   |                                    | <i>Queen Mary University London / Barts Health NHS Trust</i>                                                                                   |
| John    | Prowle    | Programme Co-director      | j.prowle@qmul.ac.uk                | Senior Clinical Lecturer in Intensive Care Medicine - <i>Queen Mary University London / Barts Health NHS Trust</i>                             |
| Tim     | Stephens  | Investigator               | t.t.stephens@qmul.ac.uk            | Nurse Researcher with special interest critical care and perioperative medicine - <i>Queen Mary University London / Barts Health NHS Trust</i> |
| Ann     | Thomson   | Senior trials co-ordinator | ann.thomson@qmul.ac.uk             | Senior Trial Manager - <i>Queen Mary University London</i>                                                                                     |
| Mel     | Smuk      | Statistician               | m.smuk@qmul.ac.uk                  | Senior Statistician and Lecturer in Medical Statistics - <i>Queen Mary University London</i>                                                   |
| Charles | Knowles   | Clinical Advisor           | c.h.knowles@qmul.ac.uk             | Professor of Surgery, Deputy Director of Research and Director of National Bowel Research Centre - <i>Barts Health NHS Trust</i>               |
| Neil    | MacDonald | Clinical Advisor           | Neil.Macdonald@bartshhealth.nhs.uk | Consultant anaesthetist - <i>Barts Health NHS Trust</i>                                                                                        |
| Sandra  | Eldridge  | Senior Co-Investigator     | s.eldridge@qmul.ac.uk              | Professor of Biostatistics and Director of the Pragmatic Clinical Trials Unit, QMUL - <i>Queen Mary University London</i>                      |
| Sara    | Shaw      | Senior Co-Investigator     | sara.shaw@phc.ox.ac.uk             | Professor of Health & Social Policy with a background in sociology - <i>Oxford University</i>                                                  |

#### **Project 4.2: Cluster randomised trial**

| <b>First Name</b> | <b>Surname</b> | <b>Role in OSIRIS</b>      | <b>Contact details</b>             | <b>Background/Affiliations</b>                                                                                                                 |
|-------------------|----------------|----------------------------|------------------------------------|------------------------------------------------------------------------------------------------------------------------------------------------|
| Rupert            | Pearse         | Programme Director         | r.pearse@qmul.ac.uk                | Professor and consultant in Intensive Care Medicine - <i>Queen Mary University London / Barts Health NHS Trust</i>                             |
| John              | Prowle         | Programme Co-director      | j.prowle@qmul.ac.uk                | Senior Clinical Lecturer in Intensive Care Medicine - <i>Queen Mary University London / Barts Health NHS Trust</i>                             |
| Tim               | Stephens       | Investigator               | t.t.stephens@qmul.ac.uk            | Nurse Researcher with special interest critical care and perioperative medicine - <i>Queen Mary University London / Barts Health NHS Trust</i> |
| Ann               | Thomson        | Senior trials co-ordinator | ann.thomson@qmul.ac.uk             | Senior Trial Manager - <i>Queen Mary University London</i>                                                                                     |
| Mel               | Smuk           | Statistician               | m.smuk@qmul.ac.uk                  | Senior Statistician and Lecturer in Medical Statistics - <i>Queen Mary University London</i>                                                   |
| Charles           | Knowles        | Clinical Advisor           | c.h.knowles@qmul.ac.uk             | Professor of Surgery, Deputy Director of Research and Director of National Bowel Research Centre - <i>Barts Health NHS Trust</i>               |
| Neil              | MacDonald      | Clinical Advisor           | Neil.Macdonald@bartshhealth.nhs.uk | Consultant anaesthetist - <i>Barts Health NHS Trust</i>                                                                                        |
| Sandra            | Eldridge       | Senior Co-Investigator     | s.eldridge@qmul.ac.uk              | Professor of Biostatistics and Director of the Pragmatic Clinical Trials Unit, QMUL - <i>Queen Mary University London</i>                      |
| Sara              | Shaw           | Senior Co-Investigator     | sara.shaw@phc.ox.ac.uk             | Professor of Health & Social Policy with a background in sociology - <i>Oxford University</i>                                                  |

#### **Project 4.3: Mixed method process evaluation of the OSIRIS cluster trial**

| <b>First Name</b> | <b>Surname</b> | <b>Role in OSIRIS</b> | <b>Contact details</b>  | <b>Background/Affiliations</b>                                                                                                                 |
|-------------------|----------------|-----------------------|-------------------------|------------------------------------------------------------------------------------------------------------------------------------------------|
| Rupert            | Pearse         | Programme Director    | r.pearse@qmul.ac.uk     | Professor and consultant in Intensive Care Medicine - <i>Queen Mary University London / Barts Health NHS Trust</i>                             |
| John              | Prowle         | Programme Co-director | j.prowle@qmul.ac.uk     | Senior Clinical Lecturer in Intensive Care Medicine - <i>Queen Mary University London / Barts Health NHS Trust</i>                             |
| Tim               | Stephens       | Investigator          | t.t.stephens@qmul.ac.uk | Nurse Researcher with special interest critical care and perioperative medicine - <i>Queen Mary University London / Barts Health NHS Trust</i> |

OSIRIS Programme Group List v1.0, 20-May-2019



|         |           |                            |                                    |                                                                                                                                  |
|---------|-----------|----------------------------|------------------------------------|----------------------------------------------------------------------------------------------------------------------------------|
| Ann     | Thomson   | Senior trials co-ordinator | ann.thomson@qmul.ac.uk             | Senior Trial Manager - <i>Queen Mary University London</i>                                                                       |
| Mel     | Smuk      | Statistician               | m.smuk@qmul.ac.uk                  | Senior Statistician and Lecturer in Medical Statistics - <i>Queen Mary University London</i>                                     |
| Charles | Knowles   | Clinical Advisor           | c.h.knowles@qmul.ac.uk             | Professor of Surgery, Deputy Director of Research and Director of National Bowel Research Centre - <i>Barts Health NHS Trust</i> |
| Neil    | MacDonald | Clinical Advisor           | Neil.Macdonald@bartshhealth.nhs.uk | Consultant anaesthetist - <i>Barts Health NHS Trust</i>                                                                          |
| Sandra  | Eldridge  | Senior Co-Investigator     | s.eldridge@qmul.ac.uk              | Professor of Biostatistics and Director of the Pragmatic Clinical Trials Unit, QMUL - <i>Queen Mary University London</i>        |
| Sara    | Shaw      | Senior Co-Investigator     | sara.shaw@phc.ox.ac.uk             | Professor of Health & Social Policy with a background in sociology - <i>Oxford University</i>                                    |

#### **Project 4.4: Health economic analyses**

| First Name | Surname   | Role in OSIRIS          | Contact details        | Background/Affiliations                                                                                                        |
|------------|-----------|-------------------------|------------------------|--------------------------------------------------------------------------------------------------------------------------------|
| Rupert     | Pearse    | Programme Director      | r.pearse@qmul.ac.uk    | Professor and consultant in Intensive Care Medicine - <i>Queen Mary University London / Barts Health NHS Trust</i>             |
| John       | Prowle    | Programme Co-director   | j.prowle@qmul.ac.uk    | Senior Clinical Lecturer in Intensive Care Medicine - <i>Queen Mary University London / Barts Health NHS Trust</i>             |
| Borislava  | Mihaylova | Senior health economist | b.mihaylova@qmul.ac.uk | Chair and Professor of Health Economics at the Centre for Primary Care and Public Health - <i>Queen Mary University London</i> |
| Vladimir   | Gordeev   | Health economist        | v.gordeev@qmul.ac.uk   | Senior Health Economist - <i>Queen Mary University London</i>                                                                  |
| Sandra     | Eldridge  | Senior Co-Investigator  | s.eldridge@qmul.ac.uk  | Professor of Biostatistics and Director of the Pragmatic Clinical Trials Unit, QMUL - <i>Queen Mary University London</i>      |

#### **Programme Steering Committee (PSC) members:**

| First Name | Surname  | Role in OSIRIS                  | Contact details           | Background/Affiliations                                                                                            |
|------------|----------|---------------------------------|---------------------------|--------------------------------------------------------------------------------------------------------------------|
| Rupert     | Pearse   | Programme Director              | r.pearse@qmul.ac.uk       | Professor and consultant in Intensive Care Medicine - <i>Queen Mary University London / Barts Health NHS Trust</i> |
| John       | Prowle   | Programme Co-director           | j.prowle@qmul.ac.uk       | Senior Clinical Lecturer in Intensive Care Medicine - <i>Queen Mary University London / Barts Health NHS Trust</i> |
| Julian     | Bion     | Chair                           | J.F.BION@bham.ac.uk       | Professor Of Intensive Care Medicine - <i>University of Birmingham</i>                                             |
| Obi        | Ukoumune | Independent Statistician member | o.c.ukoumune@exeter.ac.uk | Associate Professor in Medical Statistics - <i>University of Exeter</i>                                            |
| Michael    | Swart    | Independent member              | michael.swart@nhs.net     | Consultant in Anaesthesia and Critical Care Medicine - <i>Torbay and South Devon NHS Foundation Trust</i>          |
| John       | Hitchman | Lay member                      | jmhitchman@aol.com        | N/A                                                                                                                |

#### **Patient and public involvement group (PPI) members:**

| First Name | Surname  | Role in OSIRIS | Contact details                | Background/Affiliations                                                                                                                        |
|------------|----------|----------------|--------------------------------|------------------------------------------------------------------------------------------------------------------------------------------------|
| Lesley     | Booth    | PPI organiser  | lesley@bowelcancerresearch.org | Lead in Patient and Public Involvement – <i>Bowel &amp; Cancer Research</i>                                                                    |
| Tim        | Stephens | PPI organiser  | t.t.stephens@qmul.ac.uk        | Nurse Researcher with special interest critical care and perioperative medicine - <i>Queen Mary University London / Barts Health NHS Trust</i> |
| Leslie     | Everest  | PPI Chair      | leslieeverest2017@g            | Extensive experience in decision making for high-risk                                                                                          |

OSIRIS Programme Group List v1.0, 20-May-2019

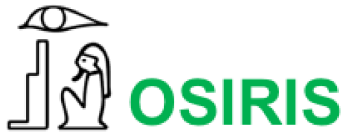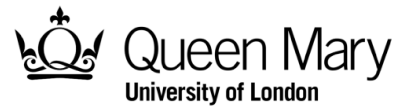

|       |         |           |                                     |                                                                |
|-------|---------|-----------|-------------------------------------|----------------------------------------------------------------|
|       |         |           | mail.com                            | surgery and sat on previous PPI committees                     |
| Nigel | Horwood | PPI Chair | nigelhorwood@btinternet.com         | Extensive experience in decision making for high-risk surgery. |
| Len   | Evans   | PPI       | lenevans1@btinternet.com            | Extensive experience in decision making for high-risk surgery. |
| Gael  | Ramsey  | PPI       | gaelramsey@msn.com                  | Extensive experience in decision making for high-risk surgery. |
| Eve   | Smyth   | PPI       | fairlady@adrianjs.free-online.co.uk | Extensive experience in decision making for high-risk surgery. |
| Brian | Morris  | PPI       | bmazing@yahoo.co.uk                 | Extensive experience in decision making for high-risk surgery. |

OSIRIS Programme Group List v1.0, 20-May-2019
